# Supplementary material for: The Neural-Fuzzy Approach as a Way of Preventing a Maritime Vessel Accident in a Heavy Traffic Zone
Source: Hindawi journal article supplement (doi:10.1155/2018/2367096), 2018-08-15
Supplement: f1 [file 2367096.f1.xlsx]

## Sheet: Лист1
1 input LV	2 input LV	3 input LV	4 input LV	Known value LV output	out	(output-out)	G1^2	sum	RMSE	|output-out|	sum	MAE	output+out	sum	SMAPE
90	330	0	0	0	4.3537e-16	-4.3537e-16	1.89547e-31	1.93006e-06	6.06325e-05	4.3537e-16	0.00611787	1.16531e-05	4.3537e-16	9779.99	6.25549e-07
270	330	0	0	0	1.1762e-07	-1.1762e-07	1.38345e-14	1.93006e-06		1.1762e-07			1.1762e-07
330	330	0	0	30	30	0	0	1.93006e-06		0			60
30	330	0	0	0	1.0167e-19	-1.0167e-19	1.03368e-38	1.93006e-06		1.0167e-19			1.0167e-19
180	330	0	0	0	-4.9393e-12	4.9393e-12	2.43967e-23	1.93006e-06		4.9393e-12			-4.9393e-12
90	30	0	0	0	5.2863e-09	-5.2863e-09	2.7945e-17	1.93006e-06		5.2863e-09			5.2863e-09
270	30	0	0	0	-2.6833e-14	2.6833e-14	7.2001e-28	1.93006e-06		2.6833e-14			-2.6833e-14
330	30	0	0	0	2.4357e-10	-2.4357e-10	5.93263e-20	1.93006e-06		2.4357e-10			2.4357e-10
30	30	0	0	30	30	0	0	1.93006e-06		0			60
180	30	0	0	0	-1.2894e-12	1.2894e-12	1.66255e-24	1.93006e-06		1.2894e-12			-1.2894e-12
90	90	0	0	30	30	0	0	1.93006e-06		0			60
270	90	0	0	0	-7.6322e-12	7.6322e-12	5.82505e-23	1.93006e-06		7.6322e-12			-7.6322e-12
330	90	0	0	0	4.4203e-14	-4.4203e-14	1.95391e-27	1.93006e-06		4.4203e-14			4.4203e-14
30	90	0	0	0	5.2879e-09	-5.2879e-09	2.79619e-17	1.93006e-06		5.2879e-09			5.2879e-09
180	90	0	0	0	2.9197e-08	-2.9197e-08	8.52465e-16	1.93006e-06		2.9197e-08			2.9197e-08
90	180	0	0	0	2.9201e-08	-2.9201e-08	8.52698e-16	1.93006e-06		2.9201e-08			2.9201e-08
270	180	0	0	0	8.0606e-09	-8.0606e-09	6.49733e-17	1.93006e-06		8.0606e-09			8.0606e-09
330	180	0	0	0	-1.1798e-12	1.1798e-12	1.39193e-24	1.93006e-06		1.1798e-12			-1.1798e-12
30	180	0	0	0	-4.7502e-12	4.7502e-12	2.25644e-23	1.93006e-06		4.7502e-12			-4.7502e-12
180	180	0	0	30	30	0	0	1.93006e-06		0			60
90	270	0	0	0	-6.5972e-12	6.5972e-12	4.3523e-23	1.93006e-06		6.5972e-12			-6.5972e-12
270	270	0	0	30	30	0	0	1.93006e-06		0			60
330	270	0	0	0	5.372e-09	-5.372e-09	2.88584e-17	1.93006e-06		5.372e-09			5.372e-09
30	270	0	0	0	1.0706e-15	-1.0706e-15	1.14618e-30	1.93006e-06		1.0706e-15			1.0706e-15
180	270	0	0	0	7.9902e-09	-7.9902e-09	6.38433e-17	1.93006e-06		7.9902e-09			7.9902e-09
90	30	330	5	-30	-30	0	0	1.93006e-06		0			-60
270	330	30	5	0	-7.4125e-06	7.4125e-06	5.49452e-11	1.93006e-06		7.4125e-06			-7.4125e-06
330	90	90	5	0	1.1543e-08	-1.1543e-08	1.33241e-16	1.93e-06		1.1543e-08			1.1543e-08
30	180	180	5	0	2.6088e-08	-2.6088e-08	6.80584e-16	1.93e-06		2.6088e-08			2.6088e-08
180	270	270	5	0	-5.119e-09	5.119e-09	2.62042e-17	1.93e-06		5.119e-09			-5.119e-09
90	330	30	5	0	-9.3035e-15	9.3035e-15	8.65551e-29	1.93e-06		9.3035e-15			-9.3035e-15
90	90	90	5	30	30	0	0	1.93e-06		0			60
90	180	180	5	0	-2.4983e-08	2.4983e-08	6.2415e-16	1.93e-06		2.4983e-08			-2.4983e-08
90	270	270	5	0	-1.1295e-11	1.1295e-11	1.27577e-22	1.93e-06		1.1295e-11			-1.1295e-11
270	30	330	5	0	8.08e-13	-8.08e-13	6.52864e-25	1.93e-06		8.08e-13			8.08e-13
270	90	90	5	0	-1.4058e-11	1.4058e-11	1.97627e-22	1.93e-06		1.4058e-11			-1.4058e-11
270	180	180	5	0	7.312e-09	-7.312e-09	5.34653e-17	1.93e-06		7.312e-09			7.312e-09
270	270	270	5	30	30	0	0	1.93e-06		0			60
330	30	330	5	0	-3.6376e-16	3.6376e-16	1.32321e-31	1.93e-06		3.6376e-16			-3.6376e-16
330	330	30	5	0	5.4131e-07	-5.4131e-07	2.93017e-13	1.93e-06		5.4131e-07			5.4131e-07
330	180	180	5	0	-6.2122e-09	6.2122e-09	3.85914e-17	1.93e-06		6.2122e-09			-6.2122e-09
330	270	270	5	0	3.86e-09	-3.86e-09	1.48996e-17	1.93e-06		3.86e-09			3.86e-09
30	30	330	5	0	-2.2299e-09	2.2299e-09	4.97245e-18	1.93e-06		2.2299e-09			-2.2299e-09
30	330	30	5	0	-8.7756e-18	8.7756e-18	7.70112e-35	1.93e-06		8.7756e-18			-8.7756e-18
30	90	90	5	0	3.5972e-09	-3.5972e-09	1.29398e-17	1.93e-06		3.5972e-09			3.5972e-09
30	270	270	5	0	-1.5499e-09	1.5499e-09	2.40219e-18	1.93e-06		1.5499e-09			-1.5499e-09
180	30	330	5	0	-1.5559e-09	1.5559e-09	2.42082e-18	1.93e-06		1.5559e-09			-1.5559e-09
180	330	30	5	0	2.9353e-10	-2.9353e-10	8.61599e-20	1.93e-06		2.9353e-10			2.9353e-10
180	90	90	5	0	2.719e-08	-2.719e-08	7.39296e-16	1.93e-06		2.719e-08			2.719e-08
180	180	180	5	30	30	0	0	1.93e-06		0			60
90	330	330	5	0	8.6782e-13	-8.6782e-13	7.53112e-25	1.93e-06		8.6782e-13			8.6782e-13
90	330	90	5	0	2.6984e-16	-2.6984e-16	7.28136e-32	1.93e-06		2.6984e-16			2.6984e-16
90	330	180	5	0	1.1025e-13	-1.1025e-13	1.21551e-26	1.93e-06		1.1025e-13			1.1025e-13
90	330	270	5	0	-3.0054e-09	3.0054e-09	9.03243e-18	1.93e-06		3.0054e-09			-3.0054e-09
270	330	330	5	0	1.275e-09	-1.275e-09	1.62563e-18	1.93e-06		1.275e-09			1.275e-09
270	330	90	5	0	8.6444e-09	-8.6444e-09	7.47257e-17	1.93e-06		8.6444e-09			8.6444e-09
270	330	180	5	0	4.8743e-09	-4.8743e-09	2.37588e-17	1.93e-06		4.8743e-09			4.8743e-09
270	330	270	5	0	4.8751e-09	-4.8751e-09	2.37666e-17	1.93e-06		4.8751e-09			4.8751e-09
330	330	330	5	30	30	0	0	1.93e-06		0			60
330	330	90	5	30	30	0	0	1.93e-06		0			60
330	330	180	5	30	30	0	0	1.93e-06		0			60
330	330	270	5	30	30	0	0	1.93e-06		0			60
30	330	330	5	0	-2.2784e-09	2.2784e-09	5.19111e-18	1.93e-06		2.2784e-09			-2.2784e-09
30	330	90	5	0	4.2654e-14	-4.2654e-14	1.81936e-27	1.93e-06		4.2654e-14			4.2654e-14
30	330	180	5	0	-8.7897e-10	8.7897e-10	7.72588e-19	1.93e-06		8.7897e-10			-8.7897e-10
30	330	270	5	-30	-30	0	0	1.93e-06		0			-60
180	330	330	5	0	-1.4441e-08	1.4441e-08	2.08542e-16	1.93e-06		1.4441e-08			-1.4441e-08
180	330	90	5	0	-6.0097e-13	6.0097e-13	3.61165e-25	1.93e-06		6.0097e-13			-6.0097e-13
180	330	180	5	0	-4.517e-13	4.517e-13	2.04033e-25	1.93e-06		4.517e-13			-4.517e-13
180	330	270	5	0	1.5795e-12	-1.5795e-12	2.49482e-24	1.93e-06		1.5795e-12			1.5795e-12
90	30	30	5	0	4.8329e-09	-4.8329e-09	2.33569e-17	1.93e-06		4.8329e-09			4.8329e-09
90	30	90	5	0	-2.024e-09	2.024e-09	4.09658e-18	1.93e-06		2.024e-09			-2.024e-09
90	30	180	5	0	-4.9236e-09	4.9236e-09	2.42418e-17	1.93e-06		4.9236e-09			-4.9236e-09
90	30	270	5	0	2.6765e-09	-2.6765e-09	7.16365e-18	1.93e-06		2.6765e-09			2.6765e-09
270	30	30	5	0	1.6342e-12	-1.6342e-12	2.67061e-24	1.93e-06		1.6342e-12			1.6342e-12
270	30	90	5	0	-6.1529e-09	6.1529e-09	3.78582e-17	1.93e-06		6.1529e-09			-6.1529e-09
270	30	180	5	0	9.9998e-12	-9.9998e-12	9.9996e-23	1.93e-06		9.9998e-12			9.9998e-12
270	30	270	5	0	-2.4793e-16	2.4793e-16	6.14693e-32	1.93e-06		2.4793e-16			-2.4793e-16
330	30	30	5	0	-1.4673e-08	1.4673e-08	2.15297e-16	1.93e-06		1.4673e-08			-1.4673e-08
330	30	90	5	-60	-59.9999	-0.0001	1e-08	1.93e-06		0.0001			-120
330	30	180	5	0	-8.9796e-08	8.9796e-08	8.06332e-15	1.92e-06		8.9796e-08			-8.9796e-08
330	30	270	5	0	3.2829e-12	-3.2829e-12	1.07774e-23	1.92e-06		3.2829e-12			3.2829e-12
30	30	30	5	30	30	0	0	1.92e-06		0			60
30	30	90	5	-30	-30	0	0	1.92e-06		0			-60
30	30	180	5	-30	-30	0	0	1.92e-06		0			-60
30	30	270	5	30	30	0	0	1.92e-06		0			60
180	30	30	5	0	-1.1799e-12	1.1799e-12	1.39216e-24	1.92e-06		1.1799e-12			-1.1799e-12
180	30	90	5	0	-7.1689e-13	7.1689e-13	5.13931e-25	1.92e-06		7.1689e-13			-7.1689e-13
180	30	180	5	0	-1.2018e-12	1.2018e-12	1.44432e-24	1.92e-06		1.2018e-12			-1.2018e-12
180	30	270	5	0	1.293e-14	-1.293e-14	1.67185e-28	1.92e-06		1.293e-14			1.293e-14
90	90	330	5	30	30	0	0	1.92e-06		0			60
90	90	30	5	30	30	0	0	1.92e-06		0			60
90	90	180	5	-30	-30	0	0	1.92e-06		0			-60
90	90	270	5	60	59.9999	0.0001	1e-08	1.92e-06		0.0001			120
270	90	330	5	0	-1.4437e-08	1.4437e-08	2.08427e-16	1.91e-06		1.4437e-08			-1.4437e-08
270	90	30	5	0	4.9237e-12	-4.9237e-12	2.42428e-23	1.91e-06		4.9237e-12			4.9237e-12
270	90	180	5	0	-7.1373e-12	7.1373e-12	5.09411e-23	1.91e-06		7.1373e-12			-7.1373e-12
270	90	270	5	0	-3.5119e-12	3.5119e-12	1.23334e-23	1.91e-06		3.5119e-12			-3.5119e-12
330	90	330	5	0	1.6076e-12	-1.6076e-12	2.58438e-24	1.91e-06		1.6076e-12			1.6076e-12
330	90	30	5	0	-3.0669e-12	3.0669e-12	9.40588e-24	1.91e-06		3.0669e-12			-3.0669e-12
330	90	180	5	0	9.7431e-12	-9.7431e-12	9.4928e-23	1.91e-06		9.7431e-12			9.7431e-12
330	90	270	5	0	2.9321e-16	-2.9321e-16	8.59721e-32	1.91e-06		2.9321e-16			2.9321e-16
30	90	330	5	0	3.4813e-09	-3.4813e-09	1.21194e-17	1.91e-06		3.4813e-09			3.4813e-09
30	90	30	5	0	4.8315e-09	-4.8315e-09	2.33434e-17	1.91e-06		4.8315e-09			4.8315e-09
30	90	180	5	30	30	0	0	1.91e-06		0			60
30	90	270	5	0	-7.7248e-08	7.7248e-08	5.96725e-15	1.91e-06		7.7248e-08			-7.7248e-08
180	90	330	5	0	-2.4964e-08	2.4964e-08	6.23201e-16	1.91e-06		2.4964e-08			-2.4964e-08
180	90	30	5	0	2.6707e-08	-2.6707e-08	7.13264e-16	1.91e-06		2.6707e-08			2.6707e-08
180	90	180	5	0	3.2192e-08	-3.2192e-08	1.03632e-15	1.91e-06		3.2192e-08			3.2192e-08
180	90	270	5	0	-2.3858e-08	2.3858e-08	5.69204e-16	1.91e-06		2.3858e-08			-2.3858e-08
90	180	330	5	0	2.4969e-08	-2.4969e-08	6.23451e-16	1.91e-06		2.4969e-08			2.4969e-08
90	180	30	5	0	2.6681e-08	-2.6681e-08	7.11876e-16	1.91e-06		2.6681e-08			2.6681e-08
90	180	90	5	0	2.7187e-08	-2.7187e-08	7.39133e-16	1.91e-06		2.7187e-08			2.7187e-08
90	180	270	5	0	5.1054e-08	-5.1054e-08	2.60651e-15	1.91e-06		5.1054e-08			5.1054e-08
270	180	330	5	0	-7.2946e-09	7.2946e-09	5.32112e-17	1.91e-06		7.2946e-09			-7.2946e-09
270	180	30	5	0	-5.2681e-09	5.2681e-09	2.77529e-17	1.91e-06		5.2681e-09			-5.2681e-09
270	180	90	5	0	1.3521e-08	-1.3521e-08	1.82817e-16	1.91e-06		1.3521e-08			1.3521e-08
270	180	270	5	0	5.1183e-09	-5.1183e-09	2.6197e-17	1.91e-06		5.1183e-09			5.1183e-09
330	180	330	5	0	5.3192e-13	-5.3192e-13	2.82939e-25	1.91e-06		5.3192e-13			5.3192e-13
330	180	30	5	0	6.0483e-13	-6.0483e-13	3.65819e-25	1.91e-06		6.0483e-13			6.0483e-13
330	180	90	5	0	-1.3027e-11	1.3027e-11	1.69703e-22	1.91e-06		1.3027e-11			-1.3027e-11
330	180	270	5	0	-6.2162e-13	6.2162e-13	3.86411e-25	1.91e-06		6.2162e-13			-6.2162e-13
30	180	330	5	0	1.6334e-11	-1.6334e-11	2.668e-22	1.91e-06		1.6334e-11			1.6334e-11
30	180	30	5	0	-4.3397e-12	4.3397e-12	1.8833e-23	1.91e-06		4.3397e-12			-4.3397e-12
30	180	90	5	0	-3.8864e-12	3.8864e-12	1.51041e-23	1.91e-06		3.8864e-12			-3.8864e-12
30	180	270	5	0	7.3675e-11	-7.3675e-11	5.42801e-21	1.91e-06		7.3675e-11			7.3675e-11
180	180	330	5	-30	-30	0	0	1.91e-06		0			-60
180	180	30	5	30	30	0	0	1.91e-06		0			60
180	180	90	5	30	30	0	0	1.91e-06		0			60
180	180	270	5	-30	-30	0	0	1.91e-06		0			-60
90	270	330	5	0	5.3342e-12	-5.3342e-12	2.84537e-23	1.91e-06		5.3342e-12			5.3342e-12
90	270	30	5	0	-5.6616e-12	5.6616e-12	3.20537e-23	1.91e-06		5.6616e-12			-5.6616e-12
90	270	90	5	0	-6.1718e-12	6.1718e-12	3.80911e-23	1.91e-06		6.1718e-12			-6.1718e-12
90	270	180	5	0	5.567e-12	-5.567e-12	3.09915e-23	1.91e-06		5.567e-12			5.567e-12
270	270	330	5	-30	-30	0	0	1.91e-06		0			-60
270	270	30	5	-30	-30	0	0	1.91e-06		0			-60
270	270	90	5	60	59.9999	0.0001	1e-08	1.91e-06		0.0001			120
270	270	180	5	30	30	0	0	1.9e-06		0			60
330	270	330	5	0	-1.2762e-09	1.2762e-09	1.62869e-18	1.9e-06		1.2762e-09			-1.2762e-09
330	270	30	5	0	-3.1732e-09	3.1732e-09	1.00692e-17	1.9e-06		3.1732e-09			-3.1732e-09
330	270	90	5	0	6.3742e-09	-6.3742e-09	4.06304e-17	1.9e-06		6.3742e-09			6.3742e-09
330	270	180	5	-30	-30	0	0	1.9e-06		0			-60
30	270	330	5	0	-8.6647e-08	8.6647e-08	7.5077e-15	1.9e-06		8.6647e-08			-8.6647e-08
30	270	30	5	0	9.3524e-16	-9.3524e-16	8.74674e-31	1.9e-06		9.3524e-16			9.3524e-16
30	270	90	5	0	8.7756e-16	-8.7756e-16	7.70112e-31	1.9e-06		8.7756e-16			8.7756e-16
30	270	180	5	0	-5.795e-12	5.795e-12	3.3582e-23	1.9e-06		5.795e-12			-5.795e-12
180	270	330	5	0	-7.2692e-09	7.2692e-09	5.28413e-17	1.9e-06		7.2692e-09			-7.2692e-09
180	270	30	5	0	-2.2477e-09	2.2477e-09	5.05216e-18	1.9e-06		2.2477e-09			-2.2477e-09
180	270	90	5	0	8.4023e-09	-8.4023e-09	7.05986e-17	1.9e-06		8.4023e-09			8.4023e-09
180	270	180	5	0	7.306e-09	-7.306e-09	5.33776e-17	1.9e-06		7.306e-09			7.306e-09
90	30	330	10	60	59.9999	0.0001	1e-08	1.9e-06		0.0001			120
270	330	30	10	-60	-59.9999	-0.0001	1e-08	1.89e-06		0.0001			-120
330	90	90	10	0	-1.4932e-07	1.4932e-07	2.22965e-14	1.88e-06		1.4932e-07			-1.4932e-07
30	180	180	10	0	3.1395e-08	-3.1395e-08	9.85646e-16	1.88e-06		3.1395e-08			3.1395e-08
180	270	270	10	0	-6.1611e-09	6.1611e-09	3.79592e-17	1.88e-06		6.1611e-09			-6.1611e-09
90	330	30	10	0	9.5858e-14	-9.5858e-14	9.18876e-27	1.88e-06		9.5858e-14			9.5858e-14
90	90	90	10	30	30	0	0	1.88e-06		0			60
90	180	180	10	0	-3.0058e-08	3.0058e-08	9.03483e-16	1.88e-06		3.0058e-08			-3.0058e-08
90	270	270	10	0	-1.3242e-11	1.3242e-11	1.75351e-22	1.88e-06		1.3242e-11			-1.3242e-11
270	30	330	10	0	-7.7582e-12	7.7582e-12	6.01897e-23	1.88e-06		7.7582e-12			-7.7582e-12
270	90	90	10	0	1.2556e-12	-1.2556e-12	1.57653e-24	1.88e-06		1.2556e-12			1.2556e-12
270	180	180	10	0	8.7636e-09	-8.7636e-09	7.68007e-17	1.88e-06		8.7636e-09			8.7636e-09
270	270	270	10	30	30	0	0	1.88e-06		0			60
330	30	330	10	0	3.5397e-15	-3.5397e-15	1.25295e-29	1.88e-06		3.5397e-15			3.5397e-15
330	330	30	10	0	-5.5426e-08	5.5426e-08	3.07204e-15	1.88e-06		5.5426e-08			-5.5426e-08
330	180	180	10	0	-7.478e-09	7.478e-09	5.59205e-17	1.88e-06		7.478e-09			-7.478e-09
330	270	270	10	0	4.6404e-09	-4.6404e-09	2.15333e-17	1.88e-06		4.6404e-09			4.6404e-09
30	30	330	10	0	1.2918e-08	-1.2918e-08	1.66875e-16	1.88e-06		1.2918e-08			1.2918e-08
30	330	30	10	0	-4.0078e-17	4.0078e-17	1.60625e-33	1.88e-06		4.0078e-17			-4.0078e-17
30	90	90	10	0	4.331e-09	-4.331e-09	1.87576e-17	1.88e-06		4.331e-09			4.331e-09
30	270	270	10	0	-4.6551e-09	4.6551e-09	2.167e-17	1.88e-06		4.6551e-09			-4.6551e-09
180	30	330	10	0	3.1163e-09	-3.1163e-09	9.71133e-18	1.88e-06		3.1163e-09			3.1163e-09
180	330	30	10	0	-2.9349e-09	2.9349e-09	8.61364e-18	1.88e-06		2.9349e-09			-2.9349e-09
180	90	90	10	0	3.2654e-08	-3.2654e-08	1.06628e-15	1.88e-06		3.2654e-08			3.2654e-08
180	180	180	10	30	30	0	0	1.88e-06		0			60
90	330	330	10	0	-5.0155e-12	5.0155e-12	2.51552e-23	1.88e-06		5.0155e-12			-5.0155e-12
90	330	90	10	0	2.8707e-16	-2.8707e-16	8.24092e-32	1.88e-06		2.8707e-16			2.8707e-16
90	330	180	10	0	3.2523e-13	-3.2523e-13	1.05775e-25	1.88e-06		3.2523e-13			3.2523e-13
90	330	270	10	0	-8.8551e-09	8.8551e-09	7.84128e-17	1.88e-06		8.8551e-09			-8.8551e-09
270	330	330	10	0	1.5286e-09	-1.5286e-09	2.33662e-18	1.88e-06		1.5286e-09			1.5286e-09
270	330	90	10	0	-1.1655e-08	1.1655e-08	1.35839e-16	1.88e-06		1.1655e-08			-1.1655e-08
270	330	180	10	0	5.8576e-09	-5.8576e-09	3.43115e-17	1.88e-06		5.8576e-09			5.8576e-09
270	330	270	10	0	5.8582e-09	-5.8582e-09	3.43185e-17	1.88e-06		5.8582e-09			5.8582e-09
330	330	330	10	30	30	0	0	1.88e-06		0			60
330	330	90	10	30	30	0	0	1.88e-06		0			60
330	330	180	10	30	30	0	0	1.88e-06		0			60
330	330	270	10	30	30	0	0	1.88e-06		0			60
30	330	330	10	0	-6.7574e-09	6.7574e-09	4.56625e-17	1.88e-06		6.7574e-09			-6.7574e-09
30	330	90	10	0	1.2515e-13	-1.2515e-13	1.56625e-26	1.88e-06		1.2515e-13			1.2515e-13
30	330	180	10	0	-2.5784e-09	2.5784e-09	6.64815e-18	1.88e-06		2.5784e-09			-2.5784e-09
30	330	270	10	-60	-59.9999	-0.0001	1e-08	1.88e-06		0.0001			-120
180	330	330	10	0	1.4582e-07	-1.4582e-07	2.12635e-14	1.87e-06		1.4582e-07			1.4582e-07
180	330	90	10	0	1.518e-13	-1.518e-13	2.30432e-26	1.87e-06		1.518e-13			1.518e-13
180	330	180	10	0	-5.4279e-13	5.4279e-13	2.94621e-25	1.87e-06		5.4279e-13			-5.4279e-13
180	330	270	10	0	-1.3488e-11	1.3488e-11	1.81926e-22	1.87e-06		1.3488e-11			-1.3488e-11
90	30	30	10	0	5.9378e-09	-5.9378e-09	3.52575e-17	1.87e-06		5.9378e-09			5.9378e-09
90	30	90	10	0	-2.4367e-09	2.4367e-09	5.93751e-18	1.87e-06		2.4367e-09			-2.4367e-09
90	30	180	10	0	-5.927e-09	5.927e-09	3.51293e-17	1.87e-06		5.927e-09			-5.927e-09
90	30	270	10	0	1.5105e-09	-1.5105e-09	2.28161e-18	1.87e-06		1.5105e-09			1.5105e-09
270	30	30	10	0	1.9577e-12	-1.9577e-12	3.83259e-24	1.87e-06		1.9577e-12			1.9577e-12
270	30	90	10	0	-7.3716e-09	7.3716e-09	5.43405e-17	1.87e-06		7.3716e-09			-7.3716e-09
270	30	180	10	0	-9.7001e-11	9.7001e-11	9.40919e-21	1.87e-06		9.7001e-11			-9.7001e-11
270	30	270	10	0	4.5429e-15	-4.5429e-15	2.06379e-29	1.87e-06		4.5429e-15			4.5429e-15
330	30	30	10	0	-1.7655e-08	1.7655e-08	3.11699e-16	1.87e-06		1.7655e-08			-1.7655e-08
330	30	90	10	-60	-59.9999	-0.0001	1e-08	1.87e-06		0.0001			-120
330	30	180	10	0	8.7108e-07	-8.7108e-07	7.5878e-13	1.86e-06		8.7108e-07			8.7108e-07
330	30	270	10	0	-3.2034e-11	3.2034e-11	1.02618e-21	1.86e-06		3.2034e-11			-3.2034e-11
30	30	30	10	30	30	0	0	1.86e-06		0			60
30	30	90	10	-30	-30	0	0	1.86e-06		0			-60
30	30	180	10	-30	-30	0	0	1.86e-06		0			-60
30	30	270	10	30	30	0	0	1.86e-06		0			60
180	30	30	10	0	-1.4323e-12	1.4323e-12	2.05148e-24	1.86e-06		1.4323e-12			-1.4323e-12
180	30	90	10	0	-8.6137e-13	8.6137e-13	7.41958e-25	1.86e-06		8.6137e-13			-8.6137e-13
180	30	180	10	0	2.8423e-12	-2.8423e-12	8.07867e-24	1.86e-06		2.8423e-12			2.8423e-12
180	30	270	10	0	6.2049e-13	-6.2049e-13	3.85008e-25	1.86e-06		6.2049e-13			6.2049e-13
90	90	330	10	30	30	0	0	1.86e-06		0			60
90	90	30	10	30	30	0	0	1.86e-06		0			60
90	90	180	10	-30	-30	0	0	1.86e-06		0			-60
90	90	270	10	60	59.9999	0.0001	1e-08	1.86e-06		0.0001			120
270	90	330	10	0	1.4585e-07	-1.4585e-07	2.12722e-14	1.85e-06		1.4585e-07			1.4585e-07
270	90	30	10	0	5.7563e-12	-5.7563e-12	3.3135e-23	1.85e-06		5.7563e-12			5.7563e-12
270	90	180	10	0	-5.3208e-12	5.3208e-12	2.83109e-23	1.85e-06		5.3208e-12			-5.3208e-12
270	90	270	10	0	-1.9816e-11	1.9816e-11	3.92674e-22	1.85e-06		1.9816e-11			-1.9816e-11
330	90	330	10	0	-1.6238e-11	1.6238e-11	2.63673e-22	1.85e-06		1.6238e-11			-1.6238e-11
330	90	30	10	0	3.9658e-11	-3.9658e-11	1.57276e-21	1.85e-06		3.9658e-11			3.9658e-11
330	90	180	10	0	-3.0383e-11	3.0383e-11	9.23127e-22	1.85e-06		3.0383e-11			-3.0383e-11
330	90	270	10	0	3.6854e-15	-3.6854e-15	1.35822e-29	1.85e-06		3.6854e-15			3.6854e-15
30	90	330	10	0	4.096e-09	-4.096e-09	1.67772e-17	1.85e-06		4.096e-09			4.096e-09
30	90	30	10	0	5.9377e-09	-5.9377e-09	3.52563e-17	1.85e-06		5.9377e-09			5.9377e-09
30	90	180	10	30	30	0	0	1.85e-06		0			60
30	90	270	10	0	8.8635e-07	-8.8635e-07	7.85616e-13	1.85e-06		8.8635e-07			8.8635e-07
180	90	330	10	0	-3.0053e-08	3.0053e-08	9.03183e-16	1.85e-06		3.0053e-08			-3.0053e-08
180	90	30	10	0	3.2504e-08	-3.2504e-08	1.05651e-15	1.85e-06		3.2504e-08			3.2504e-08
180	90	180	10	0	-4.2864e-08	4.2864e-08	1.83732e-15	1.85e-06		4.2864e-08			-4.2864e-08
180	90	270	10	0	-2.8713e-08	2.8713e-08	8.24436e-16	1.85e-06		2.8713e-08			-2.8713e-08
90	180	330	10	0	3.0041e-08	-3.0041e-08	9.02462e-16	1.85e-06		3.0041e-08			3.0041e-08
90	180	30	10	0	3.28e-08	-3.28e-08	1.07584e-15	1.85e-06		3.28e-08			3.28e-08
90	180	90	10	0	3.2724e-08	-3.2724e-08	1.07086e-15	1.85e-06		3.2724e-08			3.2724e-08
90	180	270	10	0	6.1456e-08	-6.1456e-08	3.77684e-15	1.85e-06		6.1456e-08			6.1456e-08
270	180	330	10	0	-8.9327e-09	8.9327e-09	7.97931e-17	1.85e-06		8.9327e-09			-8.9327e-09
270	180	30	10	0	-6.1481e-09	6.1481e-09	3.77991e-17	1.85e-06		6.1481e-09			-6.1481e-09
270	180	90	10	0	1.6275e-08	-1.6275e-08	2.64876e-16	1.85e-06		1.6275e-08			1.6275e-08
270	180	270	10	0	6.1595e-09	-6.1595e-09	3.79394e-17	1.85e-06		6.1595e-09			6.1595e-09
330	180	330	10	0	6.5758e-13	-6.5758e-13	4.32411e-25	1.85e-06		6.5758e-13			6.5758e-13
330	180	30	10	0	6.5952e-13	-6.5952e-13	4.34967e-25	1.85e-06		6.5952e-13			6.5952e-13
330	180	90	10	0	1.3846e-10	-1.3846e-10	1.91712e-20	1.85e-06		1.3846e-10			1.3846e-10
330	180	270	10	0	-7.4746e-13	7.4746e-13	5.58696e-25	1.85e-06		7.4746e-13			-7.4746e-13
30	180	330	10	0	-2.0051e-10	2.0051e-10	4.02043e-20	1.85e-06		2.0051e-10			-2.0051e-10
30	180	30	10	0	-5.3346e-12	5.3346e-12	2.8458e-23	1.85e-06		5.3346e-12			-5.3346e-12
30	180	90	10	0	-4.6775e-12	4.6775e-12	2.1879e-23	1.85e-06		4.6775e-12			-4.6775e-12
30	180	270	10	0	-8.3579e-10	8.3579e-10	6.98545e-19	1.85e-06		8.3579e-10			-8.3579e-10
180	180	330	10	-30	-30	0	0	1.85e-06		0			-60
180	180	30	10	30	30	0	0	1.85e-06		0			60
180	180	90	10	30	30	0	0	1.85e-06		0			60
180	180	270	10	-30	-30	0	0	1.85e-06		0			-60
90	270	330	10	0	-1.1674e-10	1.1674e-10	1.36282e-20	1.85e-06		1.1674e-10			-1.1674e-10
90	270	30	10	0	-1.025e-11	1.025e-11	1.05062e-22	1.85e-06		1.025e-11			-1.025e-11
90	270	90	10	0	-7.4268e-12	7.4268e-12	5.51574e-23	1.85e-06		7.4268e-12			-7.4268e-12
90	270	180	10	0	6.701e-12	-6.701e-12	4.49034e-23	1.85e-06		6.701e-12			6.701e-12
270	270	330	10	-30	-30	0	0	1.85e-06		0			-60
270	270	30	10	-30	-30	0	0	1.85e-06		0			-60
270	270	90	10	60	59.9999	0.0001	1e-08	1.85e-06		0.0001			120
270	270	180	10	30	30	0	0	1.84e-06		0			60
330	270	330	10	0	-1.5363e-09	1.5363e-09	2.36022e-18	1.84e-06		1.5363e-09			-1.5363e-09
330	270	30	10	0	-3.6938e-09	3.6938e-09	1.36442e-17	1.84e-06		3.6938e-09			-3.6938e-09
330	270	90	10	0	7.6742e-09	-7.6742e-09	5.88933e-17	1.84e-06		7.6742e-09			7.6742e-09
330	270	180	10	-30	-30	0	0	1.84e-06		0			-60
30	270	330	10	0	8.7487e-07	-8.7487e-07	7.65398e-13	1.84e-06		8.7487e-07			8.7487e-07
30	270	30	10	0	1.5376e-15	-1.5376e-15	2.36421e-30	1.84e-06		1.5376e-15			1.5376e-15
30	270	90	10	0	1.0511e-15	-1.0511e-15	1.10481e-30	1.84e-06		1.0511e-15			1.0511e-15
30	270	180	10	0	-6.8721e-12	6.8721e-12	4.72258e-23	1.84e-06		6.8721e-12			-6.8721e-12
180	270	330	10	0	-9.1522e-09	9.1522e-09	8.37628e-17	1.84e-06		9.1522e-09			-9.1522e-09
180	270	30	10	0	7.9138e-08	-7.9138e-08	6.26282e-15	1.84e-06		7.9138e-08			7.9138e-08
180	270	90	10	0	1.0068e-08	-1.0068e-08	1.01365e-16	1.84e-06		1.0068e-08			1.0068e-08
180	270	180	10	0	8.7828e-09	-8.7828e-09	7.71376e-17	1.84e-06		8.7828e-09			8.7828e-09
90	30	330	15	60	59.9999	0.0001	1e-08	1.84e-06		0.0001			120
270	330	30	15	60	59.9999	0.0001	1e-08	1.83e-06		0.0001			120
330	90	90	15	-60	-59.9999	-0.0001	1e-08	1.82e-06		0.0001			-120
30	180	180	15	0	-2.2677e-10	2.2677e-10	5.14246e-20	1.81e-06		2.2677e-10			-2.2677e-10
180	270	270	15	0	-3.674e-12	3.674e-12	1.34983e-23	1.81e-06		3.674e-12			-3.674e-12
90	330	30	15	0	-1.5665e-13	1.5665e-13	2.45392e-26	1.81e-06		1.5665e-13			-1.5665e-13
90	90	90	15	0	6.5685e-08	-6.5685e-08	4.31452e-15	1.81e-06		6.5685e-08			6.5685e-08
90	180	180	15	0	6.0525e-11	-6.0525e-11	3.66328e-21	1.81e-06		6.0525e-11			6.0525e-11
90	270	270	15	0	-5.1751e-12	5.1751e-12	2.67817e-23	1.81e-06		5.1751e-12			-5.1751e-12
270	30	330	15	0	3.1641e-09	-3.1641e-09	1.00115e-17	1.81e-06		3.1641e-09			3.1641e-09
270	90	90	15	0	-6.7101e-09	6.7101e-09	4.50254e-17	1.81e-06		6.7101e-09			-6.7101e-09
270	180	180	15	0	1.3539e-08	-1.3539e-08	1.83305e-16	1.81e-06		1.3539e-08			1.3539e-08
270	270	270	15	0	6.7925e-08	-6.7925e-08	4.61381e-15	1.81e-06		6.7925e-08			6.7925e-08
330	30	330	15	0	-1.4624e-12	1.4624e-12	2.13861e-24	1.81e-06		1.4624e-12			-1.4624e-12
330	330	30	15	0	6.803e-09	-6.803e-09	4.62808e-17	1.81e-06		6.803e-09			6.803e-09
330	180	180	15	0	-3.2969e-11	3.2969e-11	1.08695e-21	1.81e-06		3.2969e-11			-3.2969e-11
330	270	270	15	0	1.9477e-09	-1.9477e-09	3.79354e-18	1.81e-06		1.9477e-09			1.9477e-09
30	30	330	15	0	4.6528e-09	-4.6528e-09	2.16485e-17	1.81e-06		4.6528e-09			4.6528e-09
30	330	30	15	0	1.8352e-17	-1.8352e-17	3.36796e-34	1.81e-06		1.8352e-17			1.8352e-17
30	90	90	15	0	-1.8396e-11	1.8396e-11	3.38413e-22	1.81e-06		1.8396e-11			-1.8396e-11
30	270	270	15	0	3.444e-08	-3.444e-08	1.18611e-15	1.81e-06		3.444e-08			3.444e-08
180	30	330	15	0	2.4121e-09	-2.4121e-09	5.81823e-18	1.81e-06		2.4121e-09			2.4121e-09
180	330	30	15	0	4.3491e-09	-4.3491e-09	1.89147e-17	1.81e-06		4.3491e-09			4.3491e-09
180	90	90	15	0	2.6635e-08	-2.6635e-08	7.09423e-16	1.81e-06		2.6635e-08			2.6635e-08
180	180	180	15	0	3.9114e-08	-3.9114e-08	1.5299e-15	1.81e-06		3.9114e-08			3.9114e-08
90	330	330	15	0	2.4203e-09	-2.4203e-09	5.85785e-18	1.81e-06		2.4203e-09			2.4203e-09
90	330	90	15	0	9.4008e-17	-9.4008e-17	8.8375e-33	1.81e-06		9.4008e-17			9.4008e-17
90	330	180	15	0	-4.9346e-13	4.9346e-13	2.43503e-25	1.81e-06		4.9346e-13			-4.9346e-13
90	330	270	15	0	1.3428e-08	-1.3428e-08	1.80311e-16	1.81e-06		1.3428e-08			1.3428e-08
270	330	330	15	0	2.3811e-09	-2.3811e-09	5.66964e-18	1.81e-06		2.3811e-09			2.3811e-09
270	330	90	15	0	2.9414e-08	-2.9414e-08	8.65183e-16	1.81e-06		2.9414e-08			2.9414e-08
270	330	180	15	0	3.9113e-09	-3.9113e-09	1.52983e-17	1.81e-06		3.9113e-09			3.9113e-09
270	330	270	15	0	3.3425e-09	-3.3425e-09	1.11723e-17	1.81e-06		3.3425e-09			3.3425e-09
330	330	330	15	0	6.8549e-08	-6.8549e-08	4.69897e-15	1.81e-06		6.8549e-08			6.8549e-08
330	330	90	15	0	6.5685e-08	-6.5685e-08	4.31452e-15	1.81e-06		6.5685e-08			6.5685e-08
330	330	180	15	0	8.0196e-08	-8.0196e-08	6.4314e-15	1.81e-06		8.0196e-08			8.0196e-08
330	330	270	15	30	30	0	0	1.81e-06		0			60
30	330	330	15	0	2.3546e-08	-2.3546e-08	5.54414e-16	1.81e-06		2.3546e-08			2.3546e-08
30	330	90	15	0	4.0204e-17	-4.0204e-17	1.61636e-33	1.81e-06		4.0204e-17			4.0204e-17
30	330	180	15	0	-8.2765e-13	8.2765e-13	6.85005e-25	1.81e-06		8.2765e-13			-8.2765e-13
30	330	270	15	0	2.2524e-08	-2.2524e-08	5.07331e-16	1.81e-06		2.2524e-08			2.2524e-08
180	330	330	15	60	59.9999	0.0001	1e-08	1.81e-06		0.0001			120
180	330	90	15	0	-1.9788e-12	1.9788e-12	3.91565e-24	1.8e-06		1.9788e-12			-1.9788e-12
180	330	180	15	0	-3.3949e-13	3.3949e-13	1.15253e-25	1.8e-06		3.3949e-13			-3.3949e-13
180	330	270	15	0	5.7525e-09	-5.7525e-09	3.30913e-17	1.8e-06		5.7525e-09			5.7525e-09
90	30	30	15	0	-1.1738e-11	1.1738e-11	1.37781e-22	1.8e-06		1.1738e-11			-1.1738e-11
90	30	90	15	0	4.8163e-12	-4.8163e-12	2.31967e-23	1.8e-06		4.8163e-12			4.8163e-12
90	30	180	15	0	1.3917e-11	-1.3917e-11	1.93683e-22	1.8e-06		1.3917e-11			1.3917e-11
90	30	270	15	0	-1.1514e-08	1.1514e-08	1.32572e-16	1.8e-06		1.1514e-08			-1.1514e-08
270	30	30	15	0	3.5686e-12	-3.5686e-12	1.27349e-23	1.8e-06		3.5686e-12			3.5686e-12
270	30	90	15	0	-1.3435e-08	1.3435e-08	1.80499e-16	1.8e-06		1.3435e-08			-1.3435e-08
270	30	180	15	0	4.0248e-08	-4.0248e-08	1.6199e-15	1.8e-06		4.0248e-08			4.0248e-08
270	30	270	15	0	-1.7814e-12	1.7814e-12	3.17339e-24	1.8e-06		1.7814e-12			-1.7814e-12
330	30	30	15	0	-1.1927e-11	1.1927e-11	1.42253e-22	1.8e-06		1.1927e-11			-1.1927e-11
330	30	90	15	0	4.721e-08	-4.721e-08	2.22878e-15	1.8e-06		4.721e-08			4.721e-08
330	30	180	15	360	360	0.0004	1.6e-07	1.8e-06		0.0004			720
330	30	270	15	0	1.3285e-08	-1.3285e-08	1.76491e-16	1.64e-06		1.3285e-08			1.3285e-08
30	30	30	15	0	6.5848e-08	-6.5848e-08	4.33596e-15	1.64e-06		6.5848e-08			6.5848e-08
30	30	90	15	0	-6.5691e-08	6.5691e-08	4.31531e-15	1.64e-06		6.5691e-08			-6.5691e-08
30	30	180	15	0	-8.0223e-08	8.0223e-08	6.43573e-15	1.64e-06		8.0223e-08			-8.0223e-08
30	30	270	15	-30	-30	0	0	1.64e-06		0			-60
180	30	30	15	0	-7.3572e-12	7.3572e-12	5.41284e-23	1.64e-06		7.3572e-12			-7.3572e-12
180	30	90	15	0	-4.7763e-13	4.7763e-13	2.2813e-25	1.64e-06		4.7763e-13			-4.7763e-13
180	30	180	15	0	-1.5835e-09	1.5835e-09	2.50747e-18	1.64e-06		1.5835e-09			-1.5835e-09
180	30	270	15	0	5.0935e-13	-5.0935e-13	2.59437e-25	1.64e-06		5.0935e-13			5.0935e-13
90	90	330	15	0	6.8816e-08	-6.8816e-08	4.73564e-15	1.64e-06		6.8816e-08			6.8816e-08
90	90	30	15	0	6.5827e-08	-6.5827e-08	4.33319e-15	1.64e-06		6.5827e-08			6.5827e-08
90	90	180	15	0	-6.6964e-08	6.6964e-08	4.48418e-15	1.64e-06		6.6964e-08			-6.6964e-08
90	90	270	15	0	2.0373e-07	-2.0373e-07	4.15059e-14	1.64e-06		2.0373e-07			2.0373e-07
270	90	330	15	60	59.9999	0.0001	1e-08	1.64e-06		0.0001			120
270	90	30	15	0	-3.4817e-12	3.4817e-12	1.21222e-23	1.63e-06		3.4817e-12			-3.4817e-12
270	90	180	15	0	-1.2069e-09	1.2069e-09	1.45661e-18	1.63e-06		1.2069e-09			-1.2069e-09
270	90	270	15	0	5.7553e-09	-5.7553e-09	3.31235e-17	1.63e-06		5.7553e-09			5.7553e-09
330	90	330	15	0	6.7093e-09	-6.7093e-09	4.50147e-17	1.63e-06		6.7093e-09			6.7093e-09
330	90	30	15	0	-1.6006e-08	1.6006e-08	2.56192e-16	1.63e-06		1.6006e-08			-1.6006e-08
330	90	180	15	0	1.5544e-08	-1.5544e-08	2.41616e-16	1.63e-06		1.5544e-08			1.5544e-08
330	90	270	15	0	-1.2304e-12	1.2304e-12	1.51388e-24	1.63e-06		1.2304e-12			-1.2304e-12
30	90	330	15	0	3.4439e-08	-3.4439e-08	1.18604e-15	1.63e-06		3.4439e-08			3.4439e-08
30	90	30	15	0	-1.1735e-11	1.1735e-11	1.3771e-22	1.63e-06		1.1735e-11			-1.1735e-11
30	90	180	15	0	2.4011e-07	-2.4011e-07	5.76528e-14	1.63e-06		2.4011e-07			2.4011e-07
30	90	270	15	360	360	0.0004	1.6e-07	1.63e-06		0.0004			720
180	90	330	15	0	2.4568e-09	-2.4568e-09	6.03587e-18	1.47e-06		2.4568e-09			2.4568e-09
180	90	30	15	0	1.3265e-07	-1.3265e-07	1.7596e-14	1.47e-06		1.3265e-07			1.3265e-07
180	90	180	15	-30	-30	0	0	1.47e-06		0			-60
180	90	270	15	0	-1.0534e-09	1.0534e-09	1.10965e-18	1.47e-06		1.0534e-09			-1.0534e-09
90	180	330	15	0	-7.1259e-11	7.1259e-11	5.07785e-21	1.47e-06		7.1259e-11			-7.1259e-11
90	180	30	15	0	-1.2817e-09	1.2817e-09	1.64275e-18	1.47e-06		1.2817e-09			-1.2817e-09
90	180	90	15	0	1.151e-09	-1.151e-09	1.3248e-18	1.47e-06		1.151e-09			1.151e-09
90	180	270	15	0	-1.8979e-10	1.8979e-10	3.60202e-20	1.47e-06		1.8979e-10			-1.8979e-10
270	180	330	15	0	5.6913e-08	-5.6913e-08	3.23909e-15	1.47e-06		5.6913e-08			5.6913e-08
270	180	30	15	0	-1.185e-09	1.185e-09	1.40423e-18	1.47e-06		1.185e-09			-1.185e-09
270	180	90	15	0	1.1628e-09	-1.1628e-09	1.3521e-18	1.47e-06		1.1628e-09			1.1628e-09
270	180	270	15	0	-1.8109e-11	1.8109e-11	3.27936e-22	1.47e-06		1.8109e-11			-1.8109e-11
330	180	330	15	0	-6.3375e-12	6.3375e-12	4.01639e-23	1.47e-06		6.3375e-12			-6.3375e-12
330	180	30	15	0	1.5232e-11	-1.5232e-11	2.32014e-22	1.47e-06		1.5232e-11			1.5232e-11
330	180	90	15	0	-5.6917e-08	5.6917e-08	3.23954e-15	1.47e-06		5.6917e-08			-5.6917e-08
330	180	270	15	0	-2.9002e-13	2.9002e-13	8.41116e-26	1.47e-06		2.9002e-13			-2.9002e-13
30	180	330	15	0	8.1266e-08	-8.1266e-08	6.60416e-15	1.47e-06		8.1266e-08			8.1266e-08
30	180	30	15	0	1.5379e-13	-1.5379e-13	2.36514e-26	1.47e-06		1.5379e-13			1.5379e-13
30	180	90	15	0	-1.2456e-13	1.2456e-13	1.55152e-26	1.47e-06		1.2456e-13			-1.2456e-13
30	180	270	15	0	3.4142e-07	-3.4142e-07	1.16568e-13	1.47e-06		3.4142e-07			3.4142e-07
180	180	330	15	0	-7.9317e-08	7.9317e-08	6.29119e-15	1.47e-06		7.9317e-08			-7.9317e-08
180	180	30	15	-30	-30	0	0	1.47e-06		0			-60
180	180	90	15	30	30	0	0	1.47e-06		0			60
180	180	270	15	0	-6.5845e-08	6.5845e-08	4.33556e-15	1.47e-06		6.5845e-08			-6.5845e-08
90	270	330	15	0	4.5467e-08	-4.5467e-08	2.06725e-15	1.47e-06		4.5467e-08			4.5467e-08
90	270	30	15	0	1.2133e-09	-1.2133e-09	1.4721e-18	1.47e-06		1.2133e-09			1.2133e-09
90	270	90	15	0	-5.802e-13	5.802e-13	3.36632e-25	1.47e-06		5.802e-13			-5.802e-13
90	270	180	15	0	-9.0895e-14	9.0895e-14	8.2619e-27	1.47e-06		9.0895e-14			-9.0895e-14
270	270	330	15	0	-6.5727e-08	6.5727e-08	4.32004e-15	1.47e-06		6.5727e-08			-6.5727e-08
270	270	30	15	0	-6.0562e-08	6.0562e-08	3.66776e-15	1.47e-06		6.0562e-08			-6.0562e-08
270	270	90	15	0	1.6171e-07	-1.6171e-07	2.61501e-14	1.47e-06		1.6171e-07			1.6171e-07
270	270	180	15	60	59.9999	0.0001	1e-08	1.47e-06		0.0001			120
330	270	330	15	0	2.8513e-12	-2.8513e-12	8.12991e-24	1.46e-06		2.8513e-12			2.8513e-12
330	270	30	15	0	6.746e-12	-6.746e-12	4.55085e-23	1.46e-06		6.746e-12			6.746e-12
330	270	90	15	0	-1.4962e-11	1.4962e-11	2.23861e-22	1.46e-06		1.4962e-11			-1.4962e-11
330	270	180	15	0	1.0214e-07	-1.0214e-07	1.04326e-14	1.46e-06		1.0214e-07			1.0214e-07
30	270	330	15	360	360	0.0004	1.6e-07	1.46e-06		0.0004			720
30	270	30	15	0	-1.4284e-13	1.4284e-13	2.04033e-26	1.3e-06		1.4284e-13			-1.4284e-13
30	270	90	15	0	1.1979e-16	-1.1979e-16	1.43496e-32	1.3e-06		1.1979e-16			1.1979e-16
30	270	180	15	0	-1.0594e-12	1.0594e-12	1.12233e-24	1.3e-06		1.0594e-12			-1.0594e-12
180	270	330	15	0	1.6507e-07	-1.6507e-07	2.72481e-14	1.3e-06		1.6507e-07			1.6507e-07
180	270	30	15	30	30	0	0	1.3e-06		0			60
180	270	90	15	0	1.476e-08	-1.476e-08	2.17858e-16	1.3e-06		1.476e-08			1.476e-08
180	270	180	15	0	2.3736e-09	-2.3736e-09	5.63398e-18	1.3e-06		2.3736e-09			2.3736e-09
90	30	330	25	360	360	0.0004	1.6e-07	1.3e-06		0.0004			720
270	330	30	25	360	360	0.0004	1.6e-07	1.14e-06		0.0004			720
330	90	90	25	0	-7.9252e-09	7.9252e-09	6.28088e-17	9.8e-07		7.9252e-09			-7.9252e-09
30	180	180	25	0	3.4038e-07	-3.4038e-07	1.15859e-13	9.8e-07		3.4038e-07			3.4038e-07
180	270	270	25	0	3.442e-08	-3.442e-08	1.18474e-15	9.8e-07		3.442e-08			3.442e-08
90	330	30	25	0	-4.6416e-13	4.6416e-13	2.15445e-25	9.8e-07		4.6416e-13			-4.6416e-13
90	90	90	25	0	-3.2949e-11	3.2949e-11	1.08564e-21	9.8e-07		3.2949e-11			-3.2949e-11
90	180	180	25	0	-4.4927e-11	4.4927e-11	2.01844e-21	9.8e-07		4.4927e-11			-4.4927e-11
90	270	270	25	0	1.9402e-09	-1.9402e-09	3.76438e-18	9.8e-07		1.9402e-09			1.9402e-09
270	30	330	25	0	-1.8743e-12	1.8743e-12	3.513e-24	9.8e-07		1.8743e-12			-1.8743e-12
270	90	90	25	0	-1.5929e-09	1.5929e-09	2.53733e-18	9.8e-07		1.5929e-09			-1.5929e-09
270	180	180	25	0	-1.5835e-11	1.5835e-11	2.50747e-22	9.8e-07		1.5835e-11			-1.5835e-11
270	270	270	25	0	-3.0352e-11	3.0352e-11	9.21244e-22	9.8e-07		3.0352e-11			-3.0352e-11
330	30	330	25	0	7.5212e-16	-7.5212e-16	5.65684e-31	9.8e-07		7.5212e-16			7.5212e-16
330	330	30	25	0	4.014e-08	-4.014e-08	1.61122e-15	9.8e-07		4.014e-08			4.014e-08
330	180	180	25	0	8.1059e-08	-8.1059e-08	6.57056e-15	9.8e-07		8.1059e-08			8.1059e-08
330	270	270	25	0	1.3244e-08	-1.3244e-08	1.75404e-16	9.8e-07		1.3244e-08			1.3244e-08
30	30	330	25	0	4.5323e-08	-4.5323e-08	2.05417e-15	9.8e-07		4.5323e-08			4.5323e-08
30	330	30	25	0	2.0249e-16	-2.0249e-16	4.10022e-32	9.8e-07		2.0249e-16			2.0249e-16
30	90	90	25	0	2.0557e-08	-2.0557e-08	4.2259e-16	9.8e-07		2.0557e-08			2.0557e-08
30	270	270	25	0	2.3468e-08	-2.3468e-08	5.50747e-16	9.8e-07		2.3468e-08			2.3468e-08
180	30	330	25	0	1.4505e-08	-1.4505e-08	2.10395e-16	9.8e-07		1.4505e-08			1.4505e-08
180	330	30	25	0	1.4269e-08	-1.4269e-08	2.03604e-16	9.8e-07		1.4269e-08			1.4269e-08
180	90	90	25	0	9.5713e-08	-9.5713e-08	9.16098e-15	9.8e-07		9.5713e-08			9.5713e-08
180	180	180	25	0	-1.4858e-11	1.4858e-11	2.2076e-22	9.8e-07		1.4858e-11			-1.4858e-11
90	330	330	25	0	2.8625e-09	-2.8625e-09	8.19391e-18	9.8e-07		2.8625e-09			2.8625e-09
90	330	90	25	0	-9.2049e-14	9.2049e-14	8.47302e-27	9.8e-07		9.2049e-14			-9.2049e-14
90	330	180	25	0	1.1024e-09	-1.1024e-09	1.21529e-18	9.8e-07		1.1024e-09			1.1024e-09
90	330	270	25	30	30	0	0	9.8e-07		0			60
270	330	330	25	0	-1.9907e-12	1.9907e-12	3.96289e-24	9.8e-07		1.9907e-12			-1.9907e-12
270	330	90	25	30	30	0	0	9.8e-07		0			60
270	330	180	25	0	5.0481e-09	-5.0481e-09	2.54833e-17	9.8e-07		5.0481e-09			5.0481e-09
270	330	270	25	0	-1.7056e-12	1.7056e-12	2.90907e-24	9.8e-07		1.7056e-12			-1.7056e-12
330	330	330	25	0	-2.7771e-11	2.7771e-11	7.71228e-22	9.8e-07		2.7771e-11			-2.7771e-11
330	330	90	25	0	5.0187e-09	-5.0187e-09	2.51873e-17	9.8e-07		5.0187e-09			5.0187e-09
330	330	180	25	30	30	0	0	9.8e-07		0			60
330	330	270	25	0	1.4505e-08	-1.4505e-08	2.10395e-16	9.8e-07		1.4505e-08			1.4505e-08
30	330	330	25	0	3.4405e-08	-3.4405e-08	1.1837e-15	9.8e-07		3.4405e-08			3.4405e-08
30	330	90	25	0	-6.4268e-13	6.4268e-13	4.13038e-25	9.8e-07		6.4268e-13			-6.4268e-13
30	330	180	25	0	1.3246e-08	-1.3246e-08	1.75457e-16	9.8e-07		1.3246e-08			1.3246e-08
30	330	270	25	360	360	0.0004	1.6e-07	9.8e-07		0.0004			720
180	330	330	25	0	5.0336e-08	-5.0336e-08	2.53371e-15	8.2e-07		5.0336e-08			5.0336e-08
180	330	90	25	0	1.1848e-09	-1.1848e-09	1.40375e-18	8.2e-07		1.1848e-09			1.1848e-09
180	330	180	25	0	-2.3243e-13	2.3243e-13	5.40237e-26	8.2e-07		2.3243e-13			-2.3243e-13
180	330	270	25	0	1.2023e-09	-1.2023e-09	1.44553e-18	8.2e-07		1.2023e-09			1.2023e-09
90	30	30	25	0	-7.573e-13	7.573e-13	5.73503e-25	8.2e-07		7.573e-13			-7.573e-13
90	30	90	25	0	3.0629e-13	-3.0629e-13	9.38136e-26	8.2e-07		3.0629e-13			3.0629e-13
90	30	180	25	0	-4.8862e-09	4.8862e-09	2.3875e-17	8.2e-07		4.8862e-09			-4.8862e-09
90	30	270	25	-30	-30	0	0	8.2e-07		0			-60
270	30	30	25	0	-7.9883e-09	7.9883e-09	6.38129e-17	8.2e-07		7.9883e-09			-7.9883e-09
270	30	90	25	-30	-30	0	0	8.2e-07		0			-60
270	30	180	25	0	-1.7336e-09	1.7336e-09	3.00537e-18	8.2e-07		1.7336e-09			-1.7336e-09
270	30	270	25	0	9.3164e-14	-9.3164e-14	8.67953e-27	8.2e-07		9.3164e-14			9.3164e-14
330	30	30	25	0	9.5728e-08	-9.5728e-08	9.16385e-15	8.2e-07		9.5728e-08			9.5728e-08
330	30	90	25	360	360	0.0004	1.6e-07	8.2e-07		0.0004			720
330	30	180	25	0	1.8172e-07	-1.8172e-07	3.30222e-14	6.6e-07		1.8172e-07			1.8172e-07
330	30	270	25	0	-6.5639e-12	6.5639e-12	4.30848e-23	6.6e-07		6.5639e-12			-6.5639e-12
30	30	30	25	0	-2.6056e-11	2.6056e-11	6.78915e-22	6.6e-07		2.6056e-11			-2.6056e-11
30	30	90	25	0	-1.6877e-09	1.6877e-09	2.84833e-18	6.6e-07		1.6877e-09			-1.6877e-09
30	30	180	25	-30	-30	0	0	6.6e-07		0			-60
30	30	270	25	0	-1.8351e-08	1.8351e-08	3.36759e-16	6.6e-07		1.8351e-08			-1.8351e-08
180	30	30	25	0	1.8934e-08	-1.8934e-08	3.58496e-16	6.6e-07		1.8934e-08			1.8934e-08
180	30	90	25	0	-1.195e-09	1.195e-09	1.42803e-18	6.6e-07		1.195e-09			-1.195e-09
180	30	180	25	0	9.6081e-13	-9.6081e-13	9.23156e-25	6.6e-07		9.6081e-13			9.6081e-13
180	30	270	25	0	-1.2104e-09	1.2104e-09	1.46507e-18	6.6e-07		1.2104e-09			-1.2104e-09
90	90	330	25	0	2.4639e-08	-2.4639e-08	6.0708e-16	6.6e-07		2.4639e-08			2.4639e-08
90	90	30	25	0	1.4485e-08	-1.4485e-08	2.09815e-16	6.6e-07		1.4485e-08			1.4485e-08
90	90	180	25	0	4.7574e-08	-4.7574e-08	2.26329e-15	6.6e-07		4.7574e-08			4.7574e-08
90	90	270	25	60	59.9999	0.0001	1e-08	6.6e-07		0.0001			120
270	90	330	25	0	2.6865e-08	-2.6865e-08	7.21728e-16	6.5e-07		2.6865e-08			2.6865e-08
270	90	30	25	0	1.4269e-08	-1.4269e-08	2.03604e-16	6.5e-07		1.4269e-08			1.4269e-08
270	90	180	25	0	6.3752e-13	-6.3752e-13	4.06432e-25	6.5e-07		6.3752e-13			6.3752e-13
270	90	270	25	0	-2.6425e-12	2.6425e-12	6.98281e-24	6.5e-07		2.6425e-12			-2.6425e-12
330	90	330	25	0	-2.9904e-12	2.9904e-12	8.94249e-24	6.5e-07		2.9904e-12			-2.9904e-12
330	90	30	25	0	6.5661e-13	-6.5661e-13	4.31137e-25	6.5e-07		6.5661e-13			6.5661e-13
330	90	180	25	0	-8.4365e-11	8.4365e-11	7.11745e-21	6.5e-07		8.4365e-11			-8.4365e-11
330	90	270	25	0	3.3963e-15	-3.3963e-15	1.15349e-29	6.5e-07		3.3963e-15			3.3963e-15
30	90	330	25	0	-1.956e-11	1.956e-11	3.82594e-22	6.5e-07		1.956e-11			-1.956e-11
30	90	30	25	0	-6.554e-12	6.554e-12	4.29549e-23	6.5e-07		6.554e-12			-6.554e-12
30	90	180	25	360	360	0.0004	1.6e-07	6.5e-07		0.0004			720
30	90	270	25	0	1.8198e-07	-1.8198e-07	3.31167e-14	4.9e-07		1.8198e-07			1.8198e-07
180	90	330	25	0	-2.8442e-08	2.8442e-08	8.08947e-16	4.9e-07		2.8442e-08			-2.8442e-08
180	90	30	25	360	360	0.0004	1.6e-07	4.9e-07		0.0004			720
180	90	180	25	0	-1.3433e-08	1.3433e-08	1.80445e-16	3.3e-07		1.3433e-08			-1.3433e-08
180	90	270	25	0	2.4215e-09	-2.4215e-09	5.86366e-18	3.3e-07		2.4215e-09			2.4215e-09
90	180	330	25	0	-1.2333e-09	1.2333e-09	1.52103e-18	3.3e-07		1.2333e-09			-1.2333e-09
90	180	30	25	0	1.1988e-09	-1.1988e-09	1.43712e-18	3.3e-07		1.1988e-09			1.1988e-09
90	180	90	25	0	-8.3153e-13	8.3153e-13	6.91442e-25	3.3e-07		8.3153e-13			-8.3153e-13
90	180	270	25	0	5.6743e-08	-5.6743e-08	3.21977e-15	3.3e-07		5.6743e-08			5.6743e-08
270	180	330	25	0	-1.22e-09	1.22e-09	1.4884e-18	3.3e-07		1.22e-09			-1.22e-09
270	180	30	25	0	1.1716e-09	-1.1716e-09	1.37265e-18	3.3e-07		1.1716e-09			1.1716e-09
270	180	90	25	0	1.3517e-08	-1.3517e-08	1.82709e-16	3.3e-07		1.3517e-08			1.3517e-08
270	180	270	25	0	1.2203e-13	-1.2203e-13	1.48913e-26	3.3e-07		1.2203e-13			1.2203e-13
330	180	330	25	0	1.2444e-13	-1.2444e-13	1.54853e-26	3.3e-07		1.2444e-13			1.2444e-13
330	180	30	25	0	-1.2114e-13	1.2114e-13	1.46749e-26	3.3e-07		1.2114e-13			-1.2114e-13
330	180	90	25	0	6.0321e-12	-6.0321e-12	3.63862e-23	3.3e-07		6.0321e-12			6.0321e-12
330	180	270	25	0	-2.9793e-12	2.9793e-12	8.87623e-24	3.3e-07		2.9793e-12			-2.9793e-12
30	180	330	25	0	-3.608e-11	3.608e-11	1.30177e-21	3.3e-07		3.608e-11			-3.608e-11
30	180	30	25	0	-1.3655e-13	1.3655e-13	1.86459e-26	3.3e-07		1.3655e-13			-1.3655e-13
30	180	90	25	0	-1.9414e-11	1.9414e-11	3.76903e-22	3.3e-07		1.9414e-11			-1.9414e-11
30	180	270	25	0	-1.7537e-10	1.7537e-10	3.07546e-20	3.3e-07		1.7537e-10			-1.7537e-10
180	180	330	25	-30	-30	0	0	3.3e-07		0			-60
180	180	30	25	30	30	0	0	3.3e-07		0			60
180	180	90	25	0	2.1339e-08	-2.1339e-08	4.55353e-16	3.3e-07		2.1339e-08			2.1339e-08
180	180	270	25	0	-2.8582e-09	2.8582e-09	8.16931e-18	3.3e-07		2.8582e-09			-2.8582e-09
90	270	330	25	0	1.4484e-08	-1.4484e-08	2.09786e-16	3.3e-07		1.4484e-08			1.4484e-08
90	270	30	25	0	-8.0974e-13	8.0974e-13	6.55679e-25	3.3e-07		8.0974e-13			-8.0974e-13
90	270	90	25	0	-7.7013e-14	7.7013e-14	5.931e-27	3.3e-07		7.7013e-14			-7.7013e-14
90	270	180	25	0	-6.1605e-14	6.1605e-14	3.79518e-27	3.3e-07		6.1605e-14			-6.1605e-14
270	270	330	25	0	1.429e-08	-1.429e-08	2.04204e-16	3.3e-07		1.429e-08			1.429e-08
270	270	30	25	0	3.9484e-08	-3.9484e-08	1.55899e-15	3.3e-07		3.9484e-08			3.9484e-08
270	270	90	25	60	59.9999	0.0001	1e-08	3.3e-07		0.0001			120
270	270	180	25	0	7.0388e-08	-7.0388e-08	4.95447e-15	3.2e-07		7.0388e-08			7.0388e-08
330	270	330	25	0	-2.5573e-12	2.5573e-12	6.53978e-24	3.2e-07		2.5573e-12			-2.5573e-12
330	270	30	25	0	-9.2459e-12	9.2459e-12	8.54867e-23	3.2e-07		9.2459e-12			-9.2459e-12
330	270	90	25	0	2.7245e-08	-2.7245e-08	7.4229e-16	3.2e-07		2.7245e-08			2.7245e-08
330	270	180	25	360	360	0.0004	1.6e-07	3.2e-07		0.0004			720
30	270	330	25	0	1.6113e-07	-1.6113e-07	2.59629e-14	1.6e-07		1.6113e-07			1.6113e-07
30	270	30	25	0	9.4285e-17	-9.4285e-17	8.88966e-33	1.6e-07		9.4285e-17			9.4285e-17
30	270	90	25	0	4.4064e-15	-4.4064e-15	1.94164e-29	1.6e-07		4.4064e-15			4.4064e-15
30	270	180	25	0	-7.7232e-11	7.7232e-11	5.96478e-21	1.6e-07		7.7232e-11			-7.7232e-11
180	270	330	25	360	360	0.0004	1.6e-07	1.6e-07		0.0004			720
180	270	30	25	0	2.012e-08	-2.012e-08	4.04814e-16	4.10428e-16		2.012e-08			2.012e-08
180	270	90	25	0	2.3693e-09	-2.3693e-09	5.61358e-18	5.6136e-18		2.3693e-09			2.3693e-09
180	270	180	25	0	-3.7505e-12	3.7505e-12	1.40663e-23	1.40663e-23		3.7505e-12			-3.7505e-12
