# Supplementary material for: The Neural-Fuzzy Approach as a Way of Preventing a Maritime Vessel Accident in a Heavy Traffic Zone
Source: Hindawi journal article supplement (doi:10.1155/2018/2367096), 2018-08-15
Supplement: f4 [file 2367096.f4.xlsx]

## Sheet: Лист1
1 input LV	2 input LV	3 input LV	4 input LV	Known value LV output	out	(output-out)	G1^2	sum	RMSE	|output-out|	sum	MAE	output+out	sum	SMAPE
90	330	0	0	0	5.5067e-16	-5.5067e-16	3.03237e-31	1.93007e-06	6.06327e-05	5.5067e-16	0.00611936	1.16559e-05	5.5067e-16	9779.99	6.25702e-07
270	330	0	0	0	1.3073e-07	-1.3073e-07	1.70903e-14	1.93007e-06		1.3073e-07			1.3073e-07
330	330	0	0	30	30	0	0	1.93007e-06		0			60
30	330	0	0	0	1.3195e-19	-1.3195e-19	1.74108e-38	1.93007e-06		1.3195e-19			1.3195e-19
180	330	0	0	0	-5.9721e-12	5.9721e-12	3.5666e-23	1.93007e-06		5.9721e-12			-5.9721e-12
90	30	0	0	0	5.7714e-09	-5.7714e-09	3.33091e-17	1.93007e-06		5.7714e-09			5.7714e-09
270	30	0	0	0	-3.2898e-14	3.2898e-14	1.08228e-27	1.93007e-06		3.2898e-14			-3.2898e-14
330	30	0	0	0	2.8323e-10	-2.8323e-10	8.02192e-20	1.93007e-06		2.8323e-10			2.8323e-10
30	30	0	0	30	30	0	0	1.93007e-06		0			60
180	30	0	0	0	-1.4771e-12	1.4771e-12	2.18182e-24	1.93007e-06		1.4771e-12			-1.4771e-12
90	90	0	0	30	30	0	0	1.93007e-06		0			60
270	90	0	0	0	-8.6324e-12	8.6324e-12	7.45183e-23	1.93007e-06		8.6324e-12			-8.6324e-12
330	90	0	0	0	6.0251e-14	-6.0251e-14	3.63018e-27	1.93007e-06		6.0251e-14			6.0251e-14
30	90	0	0	0	5.7717e-09	-5.7717e-09	3.33125e-17	1.93007e-06		5.7717e-09			5.7717e-09
180	90	0	0	0	3.0507e-08	-3.0507e-08	9.30677e-16	1.93007e-06		3.0507e-08			3.0507e-08
90	180	0	0	0	3.0514e-08	-3.0514e-08	9.31104e-16	1.93007e-06		3.0514e-08			3.0514e-08
270	180	0	0	0	8.7383e-09	-8.7383e-09	7.63579e-17	1.93007e-06		8.7383e-09			8.7383e-09
330	180	0	0	0	-1.3965e-12	1.3965e-12	1.95021e-24	1.93007e-06		1.3965e-12			-1.3965e-12
30	180	0	0	0	-5.4184e-12	5.4184e-12	2.93591e-23	1.93007e-06		5.4184e-12			-5.4184e-12
180	180	0	0	30	30	0	0	1.93007e-06		0			60
90	270	0	0	0	-7.4642e-12	7.4642e-12	5.57143e-23	1.93007e-06		7.4642e-12			-7.4642e-12
270	270	0	0	30	30	0	0	1.93007e-06		0			60
330	270	0	0	0	5.8698e-09	-5.8698e-09	3.44546e-17	1.93007e-06		5.8698e-09			5.8698e-09
30	270	0	0	0	1.3222e-15	-1.3222e-15	1.74821e-30	1.93007e-06		1.3222e-15			1.3222e-15
180	270	0	0	0	8.6731e-09	-8.6731e-09	7.52227e-17	1.93007e-06		8.6731e-09			8.6731e-09
90	30	330	5	-30	-30	0	0	1.93007e-06		0			-60
270	330	30	5	0	-7.9672e-06	7.9672e-06	6.34763e-11	1.93007e-06		7.9672e-06			-7.9672e-06
330	90	90	5	0	1.3857e-08	-1.3857e-08	1.92016e-16	1.93e-06		1.3857e-08			1.3857e-08
30	180	180	5	0	2.7028e-08	-2.7028e-08	7.30513e-16	1.93e-06		2.7028e-08			2.7028e-08
180	270	270	5	0	-5.4962e-09	5.4962e-09	3.02082e-17	1.93e-06		5.4962e-09			-5.4962e-09
90	330	30	5	0	-1.1912e-14	1.1912e-14	1.41896e-28	1.93e-06		1.1912e-14			-1.1912e-14
90	90	90	5	30	30	0	0	1.93e-06		0			60
90	180	180	5	0	-2.5822e-08	2.5822e-08	6.66776e-16	1.93e-06		2.5822e-08			-2.5822e-08
90	270	270	5	0	-1.2649e-11	1.2649e-11	1.59997e-22	1.93e-06		1.2649e-11			-1.2649e-11
270	30	330	5	0	1.0337e-12	-1.0337e-12	1.06854e-24	1.93e-06		1.0337e-12			1.0337e-12
270	90	90	5	0	-1.6022e-11	1.6022e-11	2.56704e-22	1.93e-06		1.6022e-11			-1.6022e-11
270	180	180	5	0	7.8692e-09	-7.8692e-09	6.19243e-17	1.93e-06		7.8692e-09			7.8692e-09
270	270	270	5	30	30	0	0	1.93e-06		0			60
330	30	330	5	0	-5.0793e-16	5.0793e-16	2.57993e-31	1.93e-06		5.0793e-16			-5.0793e-16
330	330	30	5	0	5.601e-07	-5.601e-07	3.13712e-13	1.93e-06		5.601e-07			5.601e-07
330	180	180	5	0	-6.6792e-09	6.6792e-09	4.46117e-17	1.93e-06		6.6792e-09			-6.6792e-09
330	270	270	5	0	4.1893e-09	-4.1893e-09	1.75502e-17	1.93e-06		4.1893e-09			4.1893e-09
30	30	330	5	0	-2.5516e-09	2.5516e-09	6.51066e-18	1.93e-06		2.5516e-09			-2.5516e-09
30	330	30	5	0	-1.1128e-17	1.1128e-17	1.23832e-34	1.93e-06		1.1128e-17			-1.1128e-17
30	90	90	5	0	3.9097e-09	-3.9097e-09	1.52858e-17	1.93e-06		3.9097e-09			3.9097e-09
30	270	270	5	0	-1.6574e-09	1.6574e-09	2.74697e-18	1.93e-06		1.6574e-09			-1.6574e-09
180	30	330	5	0	-1.7227e-09	1.7227e-09	2.9677e-18	1.93e-06		1.7227e-09			-1.7227e-09
180	330	30	5	0	3.4372e-10	-3.4372e-10	1.18143e-19	1.93e-06		3.4372e-10			3.4372e-10
180	90	90	5	0	2.8225e-08	-2.8225e-08	7.96651e-16	1.93e-06		2.8225e-08			2.8225e-08
180	180	180	5	30	30	0	0	1.93e-06		0			60
90	330	330	5	0	1.0795e-12	-1.0795e-12	1.16532e-24	1.93e-06		1.0795e-12			1.0795e-12
90	330	90	5	0	3.3149e-16	-3.3149e-16	1.09886e-31	1.93e-06		3.3149e-16			3.3149e-16
90	330	180	5	0	1.2877e-13	-1.2877e-13	1.65817e-26	1.93e-06		1.2877e-13			1.2877e-13
90	330	270	5	0	-3.2199e-09	3.2199e-09	1.03678e-17	1.93e-06		3.2199e-09			-3.2199e-09
270	330	330	5	0	1.3862e-09	-1.3862e-09	1.92155e-18	1.93e-06		1.3862e-09			1.3862e-09
270	330	90	5	0	9.5551e-09	-9.5551e-09	9.12999e-17	1.93e-06		9.5551e-09			9.5551e-09
270	330	180	5	0	5.2886e-09	-5.2886e-09	2.79693e-17	1.93e-06		5.2886e-09			5.2886e-09
270	330	270	5	0	5.2886e-09	-5.2886e-09	2.79693e-17	1.93e-06		5.2886e-09			5.2886e-09
330	330	330	5	30	30	0	0	1.93e-06		0			60
330	330	90	5	30	30	0	0	1.93e-06		0			60
330	330	180	5	30	30	0	0	1.93e-06		0			60
330	330	270	5	30	30	0	0	1.93e-06		0			60
30	330	330	5	0	-2.4329e-09	2.4329e-09	5.919e-18	1.93e-06		2.4329e-09			-2.4329e-09
30	330	90	5	0	5e-14	-5e-14	2.5e-27	1.93e-06		5e-14			5e-14
30	330	180	5	0	-9.4003e-10	9.4003e-10	8.83656e-19	1.93e-06		9.4003e-10			-9.4003e-10
30	330	270	5	-30	-30	0	0	1.93e-06		0			-60
180	330	330	5	0	-1.6997e-08	1.6997e-08	2.88898e-16	1.93e-06		1.6997e-08			-1.6997e-08
180	330	90	5	0	-7.1543e-13	7.1543e-13	5.1184e-25	1.93e-06		7.1543e-13			-7.1543e-13
180	330	180	5	0	-5.314e-13	5.314e-13	2.82386e-25	1.93e-06		5.314e-13			-5.314e-13
180	330	270	5	0	2.0014e-12	-2.0014e-12	4.0056e-24	1.93e-06		2.0014e-12			2.0014e-12
90	30	30	5	0	5.2383e-09	-5.2383e-09	2.74398e-17	1.93e-06		5.2383e-09			5.2383e-09
90	30	90	5	0	-2.1985e-09	2.1985e-09	4.8334e-18	1.93e-06		2.1985e-09			-2.1985e-09
90	30	180	5	0	-5.3403e-09	5.3403e-09	2.85188e-17	1.93e-06		5.3403e-09			-5.3403e-09
90	30	270	5	0	2.8148e-09	-2.8148e-09	7.9231e-18	1.93e-06		2.8148e-09			2.8148e-09
270	30	30	5	0	1.94e-12	-1.94e-12	3.7636e-24	1.93e-06		1.94e-12			1.94e-12
270	30	90	5	0	-6.6794e-09	6.6794e-09	4.46144e-17	1.93e-06		6.6794e-09			-6.6794e-09
270	30	180	5	0	1.2828e-11	-1.2828e-11	1.64558e-22	1.93e-06		1.2828e-11			1.2828e-11
270	30	270	5	0	-3.8077e-16	3.8077e-16	1.44986e-31	1.93e-06		3.8077e-16			-3.8077e-16
330	30	30	5	0	-1.5941e-08	1.5941e-08	2.54115e-16	1.93e-06		1.5941e-08			-1.5941e-08
330	30	90	5	-60	-59.9999	-0.0001	1e-08	1.93e-06		0.0001			-120
330	30	180	5	0	-1.054e-07	1.054e-07	1.11092e-14	1.92e-06		1.054e-07			-1.054e-07
330	30	270	5	0	4.2048e-12	-4.2048e-12	1.76803e-23	1.92e-06		4.2048e-12			4.2048e-12
30	30	30	5	30	30	0	0	1.92e-06		0			60
30	30	90	5	-30	-30	0	0	1.92e-06		0			-60
30	30	180	5	-30	-30	0	0	1.92e-06		0			-60
30	30	270	5	30	30	0	0	1.92e-06		0			60
180	30	30	5	0	-1.3422e-12	1.3422e-12	1.8015e-24	1.92e-06		1.3422e-12			-1.3422e-12
180	30	90	5	0	-7.9459e-13	7.9459e-13	6.31373e-25	1.92e-06		7.9459e-13			-7.9459e-13
180	30	180	5	0	-1.4068e-12	1.4068e-12	1.97909e-24	1.92e-06		1.4068e-12			-1.4068e-12
180	30	270	5	0	1.0304e-12	-1.0304e-12	1.06172e-24	1.92e-06		1.0304e-12			1.0304e-12
90	90	330	5	30	30	0	0	1.92e-06		0			60
90	90	30	5	30	30	0	0	1.92e-06		0			60
90	90	180	5	-30	-30	0	0	1.92e-06		0			-60
90	90	270	5	60	59.9999	0.0001	1e-08	1.92e-06		0.0001			120
270	90	330	5	0	-1.6993e-08	1.6993e-08	2.88762e-16	1.91e-06		1.6993e-08			-1.6993e-08
270	90	30	5	0	5.5197e-12	-5.5197e-12	3.04671e-23	1.91e-06		5.5197e-12			5.5197e-12
270	90	180	5	0	-8.057e-12	8.057e-12	6.49152e-23	1.91e-06		8.057e-12			-8.057e-12
270	90	270	5	0	-3.7141e-12	3.7141e-12	1.37945e-23	1.91e-06		3.7141e-12			-3.7141e-12
330	90	330	5	0	2.0679e-12	-2.0679e-12	4.27621e-24	1.91e-06		2.0679e-12			2.0679e-12
330	90	30	5	0	-4.0275e-12	4.0275e-12	1.62208e-23	1.91e-06		4.0275e-12			-4.0275e-12
330	90	180	5	0	1.154e-11	-1.154e-11	1.33172e-22	1.91e-06		1.154e-11			1.154e-11
330	90	270	5	0	3.0614e-16	-3.0614e-16	9.37217e-32	1.91e-06		3.0614e-16			3.0614e-16
30	90	330	5	0	3.7793e-09	-3.7793e-09	1.42831e-17	1.91e-06		3.7793e-09			3.7793e-09
30	90	30	5	0	5.2358e-09	-5.2358e-09	2.74136e-17	1.91e-06		5.2358e-09			5.2358e-09
30	90	180	5	30	30	0	0	1.91e-06		0			60
30	90	270	5	0	-9.1787e-08	9.1787e-08	8.42485e-15	1.91e-06		9.1787e-08			-9.1787e-08
180	90	330	5	0	-2.5816e-08	2.5816e-08	6.66466e-16	1.91e-06		2.5816e-08			-2.5816e-08
180	90	30	5	0	2.7708e-08	-2.7708e-08	7.67733e-16	1.91e-06		2.7708e-08			2.7708e-08
180	90	180	5	0	3.4317e-08	-3.4317e-08	1.17766e-15	1.91e-06		3.4317e-08			3.4317e-08
180	90	270	5	0	-2.4619e-08	2.4619e-08	6.06095e-16	1.91e-06		2.4619e-08			-2.4619e-08
90	180	330	5	0	2.5823e-08	-2.5823e-08	6.66827e-16	1.91e-06		2.5823e-08			2.5823e-08
90	180	30	5	0	2.7687e-08	-2.7687e-08	7.6657e-16	1.91e-06		2.7687e-08			2.7687e-08
90	180	90	5	0	2.8233e-08	-2.8233e-08	7.97102e-16	1.91e-06		2.8233e-08			2.8233e-08
90	180	270	5	0	5.2839e-08	-5.2839e-08	2.79196e-15	1.91e-06		5.2839e-08			5.2839e-08
270	180	330	5	0	-7.8499e-09	7.8499e-09	6.16209e-17	1.91e-06		7.8499e-09			-7.8499e-09
270	180	30	5	0	-5.663e-09	5.663e-09	3.20696e-17	1.91e-06		5.663e-09			-5.663e-09
270	180	90	5	0	1.4548e-08	-1.4548e-08	2.11644e-16	1.91e-06		1.4548e-08			1.4548e-08
270	180	270	5	0	5.495e-09	-5.495e-09	3.0195e-17	1.91e-06		5.495e-09			5.495e-09
330	180	330	5	0	6.2614e-13	-6.2614e-13	3.92051e-25	1.91e-06		6.2614e-13			6.2614e-13
330	180	30	5	0	7.1159e-13	-7.1159e-13	5.0636e-25	1.91e-06		7.1159e-13			7.1159e-13
330	180	90	5	0	-1.6121e-11	1.6121e-11	2.59887e-22	1.91e-06		1.6121e-11			-1.6121e-11
330	180	270	5	0	-7.2977e-13	7.2977e-13	5.32564e-25	1.91e-06		7.2977e-13			-7.2977e-13
30	180	330	5	0	2.1265e-11	-2.1265e-11	4.522e-22	1.91e-06		2.1265e-11			2.1265e-11
30	180	30	5	0	-4.9146e-12	4.9146e-12	2.41533e-23	1.91e-06		4.9146e-12			-4.9146e-12
30	180	90	5	0	-4.4134e-12	4.4134e-12	1.94781e-23	1.91e-06		4.4134e-12			-4.4134e-12
30	180	270	5	0	9.1271e-11	-9.1271e-11	8.3304e-21	1.91e-06		9.1271e-11			9.1271e-11
180	180	330	5	-30	-30	0	0	1.91e-06		0			-60
180	180	30	5	30	30	0	0	1.91e-06		0			60
180	180	90	5	30	30	0	0	1.91e-06		0			60
180	180	270	5	-30	-30	0	0	1.91e-06		0			-60
90	270	330	5	0	7.7876e-12	-7.7876e-12	6.06467e-23	1.91e-06		7.7876e-12			7.7876e-12
90	270	30	5	0	-6.3063e-12	6.3063e-12	3.97694e-23	1.91e-06		6.3063e-12			-6.3063e-12
90	270	90	5	0	-6.9405e-12	6.9405e-12	4.81705e-23	1.91e-06		6.9405e-12			-6.9405e-12
90	270	180	5	0	6.2308e-12	-6.2308e-12	3.88229e-23	1.91e-06		6.2308e-12			6.2308e-12
270	270	330	5	-30	-30	0	0	1.91e-06		0			-60
270	270	30	5	-30	-30	0	0	1.91e-06		0			-60
270	270	90	5	60	59.9999	0.0001	1e-08	1.91e-06		0.0001			120
270	270	180	5	30	30	0	0	1.9e-06		0			60
330	270	330	5	0	-1.3872e-09	1.3872e-09	1.92432e-18	1.9e-06		1.3872e-09			-1.3872e-09
330	270	30	5	0	-3.4483e-09	3.4483e-09	1.18908e-17	1.9e-06		3.4483e-09			-3.4483e-09
330	270	90	5	0	6.9122e-09	-6.9122e-09	4.77785e-17	1.9e-06		6.9122e-09			6.9122e-09
330	270	180	5	-30	-30	0	0	1.9e-06		0			-60
30	270	330	5	0	-1.0198e-07	1.0198e-07	1.03999e-14	1.9e-06		1.0198e-07			-1.0198e-07
30	270	30	5	0	1.14e-15	-1.14e-15	1.2996e-30	1.9e-06		1.14e-15			1.14e-15
30	270	90	5	0	1.0787e-15	-1.0787e-15	1.16359e-30	1.9e-06		1.0787e-15			1.0787e-15
30	270	180	5	0	-6.4923e-12	6.4923e-12	4.215e-23	1.9e-06		6.4923e-12			-6.4923e-12
180	270	330	5	0	-7.8127e-09	7.8127e-09	6.10383e-17	1.9e-06		7.8127e-09			-7.8127e-09
180	270	30	5	0	-3.1677e-09	3.1677e-09	1.00343e-17	1.9e-06		3.1677e-09			-3.1677e-09
180	270	90	5	0	9.0474e-09	-9.0474e-09	8.18554e-17	1.9e-06		9.0474e-09			9.0474e-09
180	270	180	5	0	7.861e-09	-7.861e-09	6.17953e-17	1.9e-06		7.861e-09			7.861e-09
90	30	330	10	60	59.9999	0.0001	1e-08	1.9e-06		0.0001			120
270	330	30	10	-60	-59.9999	-0.0001	1e-08	1.89e-06		0.0001			-120
330	90	90	10	0	-1.6563e-07	1.6563e-07	2.74333e-14	1.88e-06		1.6563e-07			-1.6563e-07
30	180	180	10	0	3.2962e-08	-3.2962e-08	1.08649e-15	1.88e-06		3.2962e-08			3.2962e-08
180	270	270	10	0	-5.704e-09	5.704e-09	3.25356e-17	1.88e-06		5.704e-09			-5.704e-09
90	330	30	10	0	1.156e-13	-1.156e-13	1.33634e-26	1.88e-06		1.156e-13			1.156e-13
90	90	90	10	30	30	0	0	1.88e-06		0			60
90	180	180	10	0	-3.15e-08	3.15e-08	9.9225e-16	1.88e-06		3.15e-08			-3.15e-08
90	270	270	10	0	-1.4997e-11	1.4997e-11	2.2491e-22	1.88e-06		1.4997e-11			-1.4997e-11
270	30	330	10	0	-9.3892e-12	9.3892e-12	8.81571e-23	1.88e-06		9.3892e-12			-9.3892e-12
270	90	90	10	0	2.6719e-12	-2.6719e-12	7.13905e-24	1.88e-06		2.6719e-12			2.6719e-12
270	180	180	10	0	9.5546e-09	-9.5546e-09	9.12904e-17	1.88e-06		9.5546e-09			9.5546e-09
270	270	270	10	30	30	0	0	1.88e-06		0			60
330	30	330	10	0	4.6707e-15	-4.6707e-15	2.18154e-29	1.88e-06		4.6707e-15			4.6707e-15
330	330	30	10	0	-6.1713e-08	6.1713e-08	3.80849e-15	1.88e-06		6.1713e-08			-6.1713e-08
330	180	180	10	0	-8.1467e-09	8.1467e-09	6.63687e-17	1.88e-06		8.1467e-09			-8.1467e-09
330	270	270	10	0	5.1031e-09	-5.1031e-09	2.60416e-17	1.88e-06		5.1031e-09			5.1031e-09
30	30	330	10	0	1.4298e-08	-1.4298e-08	2.04433e-16	1.88e-06		1.4298e-08			1.4298e-08
30	330	30	10	0	-5.2925e-17	5.2925e-17	2.80106e-33	1.88e-06		5.2925e-17			-5.2925e-17
30	90	90	10	0	4.769e-09	-4.769e-09	2.27434e-17	1.88e-06		4.769e-09			4.769e-09
30	270	270	10	0	-5.1417e-09	5.1417e-09	2.64371e-17	1.88e-06		5.1417e-09			-5.1417e-09
180	30	330	10	0	3.4489e-09	-3.4489e-09	1.18949e-17	1.88e-06		3.4489e-09			3.4489e-09
180	330	30	10	0	-3.2411e-09	3.2411e-09	1.05047e-17	1.88e-06		3.2411e-09			-3.2411e-09
180	90	90	10	0	3.4343e-08	-3.4343e-08	1.17944e-15	1.88e-06		3.4343e-08			3.4343e-08
180	180	180	10	30	30	0	0	1.88e-06		0			60
90	330	330	10	0	-6.0653e-12	6.0653e-12	3.67879e-23	1.88e-06		6.0653e-12			-6.0653e-12
90	330	90	10	0	3.5396e-16	-3.5396e-16	1.25288e-31	1.88e-06		3.5396e-16			3.5396e-16
90	330	180	10	0	3.9149e-13	-3.9149e-13	1.53264e-25	1.88e-06		3.9149e-13			3.9149e-13
90	330	270	10	0	-9.777e-09	9.777e-09	9.55897e-17	1.88e-06		9.777e-09			-9.777e-09
270	330	330	10	0	1.6832e-09	-1.6832e-09	2.83316e-18	1.88e-06		1.6832e-09			1.6832e-09
270	330	90	10	0	-1.2999e-08	1.2999e-08	1.68974e-16	1.88e-06		1.2999e-08			-1.2999e-08
270	330	180	10	0	6.4387e-09	-6.4387e-09	4.14569e-17	1.88e-06		6.4387e-09			6.4387e-09
270	330	270	10	0	6.4405e-09	-6.4405e-09	4.148e-17	1.88e-06		6.4405e-09			6.4405e-09
330	330	330	10	30	30	0	0	1.88e-06		0			60
330	330	90	10	30	30	0	0	1.88e-06		0			60
330	330	180	10	30	30	0	0	1.88e-06		0			60
330	330	270	10	30	30	0	0	1.88e-06		0			60
30	330	330	10	0	-7.4426e-09	7.4426e-09	5.53923e-17	1.88e-06		7.4426e-09			-7.4426e-09
30	330	90	10	0	1.5114e-13	-1.5114e-13	2.28433e-26	1.88e-06		1.5114e-13			1.5114e-13
30	330	180	10	0	-2.8406e-09	2.8406e-09	8.06901e-18	1.88e-06		2.8406e-09			-2.8406e-09
30	330	270	10	-60	-59.9999	-0.0001	1e-08	1.88e-06		0.0001			-120
180	330	330	10	0	1.6178e-07	-1.6178e-07	2.61728e-14	1.87e-06		1.6178e-07			1.6178e-07
180	330	90	10	0	1.9306e-13	-1.9306e-13	3.72722e-26	1.87e-06		1.9306e-13			1.9306e-13
180	330	180	10	0	-6.4704e-13	6.4704e-13	4.18661e-25	1.87e-06		6.4704e-13			-6.4704e-13
180	330	270	10	0	-1.631e-11	1.631e-11	2.66016e-22	1.87e-06		1.631e-11			-1.631e-11
90	30	30	10	0	6.53e-09	-6.53e-09	4.26409e-17	1.87e-06		6.53e-09			6.53e-09
90	30	90	10	0	-2.6829e-09	2.6829e-09	7.19795e-18	1.87e-06		2.6829e-09			-2.6829e-09
90	30	180	10	0	-6.5143e-09	6.5143e-09	4.24361e-17	1.87e-06		6.5143e-09			-6.5143e-09
90	30	270	10	0	1.6663e-08	-1.6663e-08	2.77656e-16	1.87e-06		1.6663e-08			1.6663e-08
270	30	30	10	0	2.3548e-12	-2.3548e-12	5.54508e-24	1.87e-06		2.3548e-12			2.3548e-12
270	30	90	10	0	-8.1057e-09	8.1057e-09	6.57024e-17	1.87e-06		8.1057e-09			-8.1057e-09
270	30	180	10	0	-1.1762e-10	1.1762e-10	1.38345e-20	1.87e-06		1.1762e-10			-1.1762e-10
270	30	270	10	0	5.9857e-15	-5.9857e-15	3.58286e-29	1.87e-06		5.9857e-15			5.9857e-15
330	30	30	10	0	-1.943e-08	1.943e-08	3.77525e-16	1.87e-06		1.943e-08			-1.943e-08
330	30	90	10	-60	-59.9999	-0.0001	1e-08	1.87e-06		0.0001			-120
330	30	180	10	0	9.6646e-07	-9.6646e-07	9.34045e-13	1.86e-06		9.6646e-07			9.6646e-07
330	30	270	10	0	-3.8765e-11	3.8765e-11	1.50273e-21	1.86e-06		3.8765e-11			-3.8765e-11
30	30	30	10	30	30	0	0	1.86e-06		0			60
30	30	90	10	-30	-30	0	0	1.86e-06		0			-60
30	30	180	10	-30	-30	0	0	1.86e-06		0			-60
30	30	270	10	30	30	0	0	1.86e-06		0			60
180	30	30	10	0	-1.6496e-12	1.6496e-12	2.72118e-24	1.86e-06		1.6496e-12			-1.6496e-12
180	30	90	10	0	-9.6747e-13	9.6747e-13	9.35998e-25	1.86e-06		9.6747e-13			-9.6747e-13
180	30	180	10	0	3.5168e-12	-3.5168e-12	1.23679e-23	1.86e-06		3.5168e-12			3.5168e-12
180	30	270	10	0	6.7686e-13	-6.7686e-13	4.58139e-25	1.86e-06		6.7686e-13			6.7686e-13
90	90	330	10	30	30	0	0	1.86e-06		0			60
90	90	30	10	30	30	0	0	1.86e-06		0			60
90	90	180	10	-30	-30	0	0	1.86e-06		0			-60
90	90	270	10	60	59.9999	0.0001	1e-08	1.86e-06		0.0001			120
270	90	330	10	0	1.6182e-07	-1.6182e-07	2.61857e-14	1.85e-06		1.6182e-07			1.6182e-07
270	90	30	10	0	6.5316e-12	-6.5316e-12	4.26618e-23	1.85e-06		6.5316e-12			6.5316e-12
270	90	180	10	0	-5.8423e-12	5.8423e-12	3.41325e-23	1.85e-06		5.8423e-12			-5.8423e-12
270	90	270	10	0	-2.3526e-11	2.3526e-11	5.53473e-22	1.85e-06		2.3526e-11			-2.3526e-11
330	90	330	10	0	-1.9688e-11	1.9688e-11	3.87617e-22	1.85e-06		1.9688e-11			-1.9688e-11
330	90	30	10	0	4.8116e-11	-4.8116e-11	2.31515e-21	1.85e-06		4.8116e-11			4.8116e-11
330	90	180	10	0	-3.7259e-11	3.7259e-11	1.38823e-21	1.85e-06		3.7259e-11			-3.7259e-11
330	90	270	10	0	4.8088e-15	-4.8088e-15	2.31246e-29	1.85e-06		4.8088e-15			4.8088e-15
30	90	330	10	0	4.495e-09	-4.495e-09	2.0205e-17	1.85e-06		4.495e-09			4.495e-09
30	90	30	10	0	6.5276e-09	-6.5276e-09	4.26096e-17	1.85e-06		6.5276e-09			6.5276e-09
30	90	180	10	30	30	0	0	1.85e-06		0			60
30	90	270	10	0	9.8328e-07	-9.8328e-07	9.6684e-13	1.85e-06		9.8328e-07			9.8328e-07
180	90	330	10	0	-3.1497e-08	3.1497e-08	9.92061e-16	1.85e-06		3.1497e-08			-3.1497e-08
180	90	30	10	0	3.4153e-08	-3.4153e-08	1.16643e-15	1.85e-06		3.4153e-08			3.4153e-08
180	90	180	10	0	-4.94e-08	4.94e-08	2.44036e-15	1.85e-06		4.94e-08			-4.94e-08
180	90	270	10	0	-3.0026e-08	3.0026e-08	9.01561e-16	1.85e-06		3.0026e-08			-3.0026e-08
90	180	330	10	0	3.1485e-08	-3.1485e-08	9.91305e-16	1.85e-06		3.1485e-08			3.1485e-08
90	180	30	10	0	3.4521e-08	-3.4521e-08	1.1917e-15	1.85e-06		3.4521e-08			3.4521e-08
90	180	90	10	0	3.4427e-08	-3.4427e-08	1.18522e-15	1.85e-06		3.4427e-08			3.4427e-08
90	180	270	10	0	6.4479e-08	-6.4479e-08	4.15754e-15	1.85e-06		6.4479e-08			6.4479e-08
270	180	330	10	0	-9.7532e-09	9.7532e-09	9.51249e-17	1.85e-06		9.7532e-09			-9.7532e-09
270	180	30	10	0	-6.6875e-09	6.6875e-09	4.47227e-17	1.85e-06		6.6875e-09			-6.6875e-09
270	180	90	10	0	1.7739e-08	-1.7739e-08	3.14672e-16	1.85e-06		1.7739e-08			1.7739e-08
270	180	270	10	0	6.7036e-09	-6.7036e-09	4.49383e-17	1.85e-06		6.7036e-09			6.7036e-09
330	180	330	10	0	7.8576e-13	-7.8576e-13	6.17419e-25	1.85e-06		7.8576e-13			7.8576e-13
330	180	30	10	0	7.8147e-13	-7.8147e-13	6.10695e-25	1.85e-06		7.8147e-13			7.8147e-13
330	180	90	10	0	1.6019e-10	-1.6019e-10	2.56608e-20	1.85e-06		1.6019e-10			1.6019e-10
330	180	270	10	0	-8.8899e-13	8.8899e-13	7.90303e-25	1.85e-06		8.8899e-13			-8.8899e-13
30	180	330	10	0	-2.4061e-10	2.4061e-10	5.78932e-20	1.85e-06		2.4061e-10			-2.4061e-10
30	180	30	10	0	-6.1275e-12	6.1275e-12	3.75463e-23	1.85e-06		6.1275e-12			-6.1275e-12
30	180	90	10	0	-5.3809e-12	5.3809e-12	2.89541e-23	1.85e-06		5.3809e-12			-5.3809e-12
30	180	270	10	0	-9.6733e-10	9.6733e-10	9.35727e-19	1.85e-06		9.6733e-10			-9.6733e-10
180	180	330	10	-30	-30	0	0	1.85e-06		0			-60
180	180	30	10	30	30	0	0	1.85e-06		0			60
180	180	90	10	30	30	0	0	1.85e-06		0			60
180	180	270	10	-30	-30	0	0	1.85e-06		0			-60
90	270	330	10	0	-1.41e-10	1.41e-10	1.9881e-20	1.85e-06		1.41e-10			-1.41e-10
90	270	30	10	0	-1.1879e-11	1.1879e-11	1.41111e-22	1.85e-06		1.1879e-11			-1.1879e-11
90	270	90	10	0	-8.464e-12	8.464e-12	7.16393e-23	1.85e-06		8.464e-12			-8.464e-12
90	270	180	10	0	7.5998e-12	-7.5998e-12	5.7757e-23	1.85e-06		7.5998e-12			7.5998e-12
270	270	330	10	-30	-30	0	0	1.85e-06		0			-60
270	270	30	10	-30	-30	0	0	1.85e-06		0			-60
270	270	90	10	60	59.9999	0.0001	1e-08	1.85e-06		0.0001			120
270	270	180	10	30	30	0	0	1.84e-06		0			60
330	270	330	10	0	-1.6924e-09	1.6924e-09	2.86422e-18	1.84e-06		1.6924e-09			-1.6924e-09
330	270	30	10	0	-4.0633e-09	4.0633e-09	1.65104e-17	1.84e-06		4.0633e-09			-4.0633e-09
330	270	90	10	0	8.4327e-09	-8.4327e-09	7.11104e-17	1.84e-06		8.4327e-09			8.4327e-09
330	270	180	10	-30	-30	0	0	1.84e-06		0			-60
30	270	330	10	0	9.7065e-07	-9.7065e-07	9.42161e-13	1.84e-06		9.7065e-07			9.7065e-07
30	270	30	10	0	1.9376e-15	-1.9376e-15	3.75429e-30	1.84e-06		1.9376e-15			1.9376e-15
30	270	90	10	0	1.3088e-15	-1.3088e-15	1.71296e-30	1.84e-06		1.3088e-15			1.3088e-15
30	270	180	10	0	-7.8019e-12	7.8019e-12	6.08696e-23	1.84e-06		7.8019e-12			-7.8019e-12
180	270	330	10	0	-1.0023e-08	1.0023e-08	1.00461e-16	1.84e-06		1.0023e-08			-1.0023e-08
180	270	30	10	0	8.7676e-08	-8.7676e-08	7.68708e-15	1.84e-06		8.7676e-08			8.7676e-08
180	270	90	10	0	1.0984e-08	-1.0984e-08	1.20648e-16	1.84e-06		1.0984e-08			1.0984e-08
180	270	180	10	0	9.5804e-09	-9.5804e-09	9.17841e-17	1.84e-06		9.5804e-09			9.5804e-09
90	30	330	15	60	59.9999	0.0001	1e-08	1.84e-06		0.0001			120
270	330	30	15	60	59.9999	0.0001	1e-08	1.83e-06		0.0001			120
330	90	90	15	-60	-59.9999	-0.0001	1e-08	1.82e-06		0.0001			-120
30	180	180	15	0	-2.5668e-10	2.5668e-10	6.58846e-20	1.81e-06		2.5668e-10			-2.5668e-10
180	270	270	15	0	-4.1073e-12	4.1073e-12	1.68699e-23	1.81e-06		4.1073e-12			-4.1073e-12
90	330	30	15	0	-1.8641e-13	1.8641e-13	3.47487e-26	1.81e-06		1.8641e-13			-1.8641e-13
90	90	90	15	0	7.2408e-08	-7.2408e-08	5.24292e-15	1.81e-06		7.2408e-08			7.2408e-08
90	180	180	15	0	6.9415e-11	-6.9415e-11	4.81844e-21	1.81e-06		6.9415e-11			6.9415e-11
90	270	270	15	0	-6.1483e-12	6.1483e-12	3.78016e-23	1.81e-06		6.1483e-12			-6.1483e-12
270	30	330	15	0	3.4531e-09	-3.4531e-09	1.19239e-17	1.81e-06		3.4531e-09			3.4531e-09
270	90	90	15	0	-7.3369e-09	7.3369e-09	5.38301e-17	1.81e-06		7.3369e-09			-7.3369e-09
270	180	180	15	0	1.466e-08	-1.466e-08	2.14916e-16	1.81e-06		1.466e-08			1.466e-08
270	270	270	15	0	7.484e-08	-7.484e-08	5.60103e-15	1.81e-06		7.484e-08			7.484e-08
330	30	330	15	0	-1.7401e-12	1.7401e-12	3.02795e-24	1.81e-06		1.7401e-12			-1.7401e-12
330	330	30	15	0	7.4505e-09	-7.4505e-09	5.551e-17	1.81e-06		7.4505e-09			7.4505e-09
330	180	180	15	0	-3.7802e-11	3.7802e-11	1.42899e-21	1.81e-06		3.7802e-11			-3.7802e-11
330	270	270	15	0	2.1254e-09	-2.1254e-09	4.51733e-18	1.81e-06		2.1254e-09			2.1254e-09
30	30	330	15	0	5.0929e-09	-5.0929e-09	2.59376e-17	1.81e-06		5.0929e-09			5.0929e-09
30	330	30	15	0	2.3864e-17	-2.3864e-17	5.6949e-34	1.81e-06		2.3864e-17			2.3864e-17
30	90	90	15	0	-2.1933e-11	2.1933e-11	4.81056e-22	1.81e-06		2.1933e-11			-2.1933e-11
30	270	270	15	0	3.7549e-08	-3.7549e-08	1.40993e-15	1.81e-06		3.7549e-08			3.7549e-08
180	30	330	15	0	2.6269e-09	-2.6269e-09	6.9006e-18	1.81e-06		2.6269e-09			2.6269e-09
180	330	30	15	0	4.7448e-09	-4.7448e-09	2.25131e-17	1.81e-06		4.7448e-09			4.7448e-09
180	90	90	15	0	2.7703e-08	-2.7703e-08	7.67456e-16	1.81e-06		2.7703e-08			2.7703e-08
180	180	180	15	0	4.4766e-08	-4.4766e-08	2.00399e-15	1.81e-06		4.4766e-08			4.4766e-08
90	330	330	15	0	2.6371e-09	-2.6371e-09	6.9543e-18	1.81e-06		2.6371e-09			2.6371e-09
90	330	90	15	0	1.2149e-16	-1.2149e-16	1.47598e-32	1.81e-06		1.2149e-16			1.2149e-16
90	330	180	15	0	-5.7995e-13	5.7995e-13	3.36342e-25	1.81e-06		5.7995e-13			-5.7995e-13
90	330	270	15	0	1.447e-08	-1.447e-08	2.09381e-16	1.81e-06		1.447e-08			1.447e-08
270	330	330	15	0	2.5938e-09	-2.5938e-09	6.7278e-18	1.81e-06		2.5938e-09			2.5938e-09
270	330	90	15	0	3.1962e-08	-3.1962e-08	1.02157e-15	1.81e-06		3.1962e-08			3.1962e-08
270	330	180	15	0	4.2704e-09	-4.2704e-09	1.82363e-17	1.81e-06		4.2704e-09			4.2704e-09
270	330	270	15	0	3.6537e-09	-3.6537e-09	1.33495e-17	1.81e-06		3.6537e-09			3.6537e-09
330	330	330	15	0	7.5526e-08	-7.5526e-08	5.70418e-15	1.81e-06		7.5526e-08			7.5526e-08
330	330	90	15	0	7.2389e-08	-7.2389e-08	5.24017e-15	1.81e-06		7.2389e-08			7.2389e-08
330	330	180	15	0	8.8037e-08	-8.8037e-08	7.75051e-15	1.81e-06		8.8037e-08			8.8037e-08
330	330	270	15	30	30	0	0	1.81e-06		0			60
30	330	330	15	0	2.5719e-08	-2.5719e-08	6.61467e-16	1.81e-06		2.5719e-08			2.5719e-08
30	330	90	15	0	4.3404e-17	-4.3404e-17	1.88391e-33	1.81e-06		4.3404e-17			4.3404e-17
30	330	180	15	0	-8.143e-13	8.143e-13	6.63084e-25	1.81e-06		8.143e-13			-8.143e-13
30	330	270	15	0	2.0323e-08	-2.0323e-08	4.13024e-16	1.81e-06		2.0323e-08			2.0323e-08
180	330	330	15	60	59.9999	0.0001	1e-08	1.81e-06		0.0001			120
180	330	90	15	0	-2.3472e-12	2.3472e-12	5.50935e-24	1.8e-06		2.3472e-12			-2.3472e-12
180	330	180	15	0	-4.0361e-13	4.0361e-13	1.62901e-25	1.8e-06		4.0361e-13			-4.0361e-13
180	330	270	15	0	6.2698e-09	-6.2698e-09	3.93104e-17	1.8e-06		6.2698e-09			6.2698e-09
90	30	30	15	0	-1.413e-11	1.413e-11	1.99657e-22	1.8e-06		1.413e-11			-1.413e-11
90	30	90	15	0	5.8086e-12	-5.8086e-12	3.37398e-23	1.8e-06		5.8086e-12			5.8086e-12
90	30	180	15	0	1.6691e-11	-1.6691e-11	2.78589e-22	1.8e-06		1.6691e-11			1.6691e-11
90	30	270	15	0	-1.2398e-08	1.2398e-08	1.5371e-16	1.8e-06		1.2398e-08			-1.2398e-08
270	30	30	15	0	4.2061e-12	-4.2061e-12	1.76913e-23	1.8e-06		4.2061e-12			4.2061e-12
270	30	90	15	0	-1.4477e-08	1.4477e-08	2.09584e-16	1.8e-06		1.4477e-08			-1.4477e-08
270	30	180	15	0	4.4017e-08	-4.4017e-08	1.9375e-15	1.8e-06		4.4017e-08			4.4017e-08
270	30	270	15	0	-2.1241e-12	2.1241e-12	4.5118e-24	1.8e-06		2.1241e-12			-2.1241e-12
330	30	30	15	0	-1.3197e-11	1.3197e-11	1.74161e-22	1.8e-06		1.3197e-11			-1.3197e-11
330	30	90	15	0	4.7939e-08	-4.7939e-08	2.29815e-15	1.8e-06		4.7939e-08			4.7939e-08
330	30	180	15	360	360	0.0004	1.6e-07	1.8e-06		0.0004			720
330	30	270	15	0	1.4497e-08	-1.4497e-08	2.10163e-16	1.64e-06		1.4497e-08			1.4497e-08
30	30	30	15	0	7.2565e-08	-7.2565e-08	5.26568e-15	1.64e-06		7.2565e-08			7.2565e-08
30	30	90	15	0	-7.239e-08	7.239e-08	5.24031e-15	1.64e-06		7.239e-08			-7.239e-08
30	30	180	15	0	-8.8075e-08	8.8075e-08	7.75721e-15	1.64e-06		8.8075e-08			-8.8075e-08
30	30	270	15	-30	-30	0	0	1.64e-06		0			-60
180	30	30	15	0	-8.6886e-12	8.6886e-12	7.54918e-23	1.64e-06		8.6886e-12			-8.6886e-12
180	30	90	15	0	-5.1934e-13	5.1934e-13	2.69714e-25	1.64e-06		5.1934e-13			-5.1934e-13
180	30	180	15	0	-1.7282e-09	1.7282e-09	2.98668e-18	1.64e-06		1.7282e-09			-1.7282e-09
180	30	270	15	0	5.9813e-13	-5.9813e-13	3.57759e-25	1.64e-06		5.9813e-13			5.9813e-13
90	90	330	15	0	7.5815e-08	-7.5815e-08	5.74791e-15	1.64e-06		7.5815e-08			7.5815e-08
90	90	30	15	0	7.2572e-08	-7.2572e-08	5.2667e-15	1.64e-06		7.2572e-08			7.2572e-08
90	90	180	15	0	-7.3793e-08	7.3793e-08	5.44541e-15	1.64e-06		7.3793e-08			-7.3793e-08
90	90	270	15	0	2.2352e-07	-2.2352e-07	4.99612e-14	1.64e-06		2.2352e-07			2.2352e-07
270	90	330	15	60	59.9999	0.0001	1e-08	1.64e-06		0.0001			120
270	90	30	15	0	-4.0981e-12	4.0981e-12	1.67944e-23	1.63e-06		4.0981e-12			-4.0981e-12
270	90	180	15	0	-1.316e-09	1.316e-09	1.73186e-18	1.63e-06		1.316e-09			-1.316e-09
270	90	270	15	0	6.2742e-09	-6.2742e-09	3.93656e-17	1.63e-06		6.2742e-09			6.2742e-09
330	90	330	15	0	7.3344e-09	-7.3344e-09	5.37934e-17	1.63e-06		7.3344e-09			7.3344e-09
330	90	30	15	0	-1.7514e-08	1.7514e-08	3.0674e-16	1.63e-06		1.7514e-08			-1.7514e-08
330	90	180	15	0	1.6954e-08	-1.6954e-08	2.87438e-16	1.63e-06		1.6954e-08			1.6954e-08
330	90	270	15	0	-1.4646e-12	1.4646e-12	2.14505e-24	1.63e-06		1.4646e-12			-1.4646e-12
30	90	330	15	0	3.7534e-08	-3.7534e-08	1.4088e-15	1.63e-06		3.7534e-08			3.7534e-08
30	90	30	15	0	-1.4125e-11	1.4125e-11	1.99516e-22	1.63e-06		1.4125e-11			-1.4125e-11
30	90	180	15	0	2.6054e-07	-2.6054e-07	6.78811e-14	1.63e-06		2.6054e-07			2.6054e-07
30	90	270	15	360	360	0.0004	1.6e-07	1.63e-06		0.0004			720
180	90	330	15	0	2.6814e-09	-2.6814e-09	7.18991e-18	1.47e-06		2.6814e-09			2.6814e-09
180	90	30	15	0	1.439e-07	-1.439e-07	2.07072e-14	1.47e-06		1.439e-07			1.439e-07
180	90	180	15	-30	-30	0	0	1.47e-06		0			-60
180	90	270	15	0	-1.1468e-09	1.1468e-09	1.31515e-18	1.47e-06		1.1468e-09			-1.1468e-09
90	180	330	15	0	-8.2121e-11	8.2121e-11	6.74386e-21	1.47e-06		8.2121e-11			-8.2121e-11
90	180	30	15	0	-1.401e-09	1.401e-09	1.9628e-18	1.47e-06		1.401e-09			-1.401e-09
90	180	90	15	0	1.2502e-09	-1.2502e-09	1.563e-18	1.47e-06		1.2502e-09			1.2502e-09
90	180	270	15	0	-2.1707e-10	2.1707e-10	4.71194e-20	1.47e-06		2.1707e-10			-2.1707e-10
270	180	330	15	0	5.9417e-08	-5.9417e-08	3.53038e-15	1.47e-06		5.9417e-08			5.9417e-08
270	180	30	15	0	-1.2906e-09	1.2906e-09	1.66565e-18	1.47e-06		1.2906e-09			-1.2906e-09
270	180	90	15	0	1.2636e-09	-1.2636e-09	1.59668e-18	1.47e-06		1.2636e-09			1.2636e-09
270	180	270	15	0	-2.1278e-11	2.1278e-11	4.52753e-22	1.47e-06		2.1278e-11			-2.1278e-11
330	180	330	15	0	-7.2304e-12	7.2304e-12	5.22787e-23	1.47e-06		7.2304e-12			-7.2304e-12
330	180	30	15	0	1.7401e-11	-1.7401e-11	3.02795e-22	1.47e-06		1.7401e-11			1.7401e-11
330	180	90	15	0	-5.9396e-08	5.9396e-08	3.52788e-15	1.47e-06		5.9396e-08			-5.9396e-08
330	180	270	15	0	-3.4244e-13	3.4244e-13	1.17265e-25	1.47e-06		3.4244e-13			-3.4244e-13
30	180	330	15	0	8.8023e-08	-8.8023e-08	7.74805e-15	1.47e-06		8.8023e-08			8.8023e-08
30	180	30	15	0	1.8385e-13	-1.8385e-13	3.38008e-26	1.47e-06		1.8385e-13			1.8385e-13
30	180	90	15	0	-1.4732e-13	1.4732e-13	2.17032e-26	1.47e-06		1.4732e-13			-1.4732e-13
30	180	270	15	0	3.5642e-07	-3.5642e-07	1.27035e-13	1.47e-06		3.5642e-07			3.5642e-07
180	180	330	15	0	-8.7099e-08	8.7099e-08	7.58624e-15	1.47e-06		8.7099e-08			-8.7099e-08
180	180	30	15	-30	-30	0	0	1.47e-06		0			-60
180	180	90	15	30	30	0	0	1.47e-06		0			60
180	180	270	15	0	-7.2557e-08	7.2557e-08	5.26452e-15	1.47e-06		7.2557e-08			-7.2557e-08
90	270	330	15	0	4.9705e-08	-4.9705e-08	2.47059e-15	1.47e-06		4.9705e-08			4.9705e-08
90	270	30	15	0	1.3222e-09	-1.3222e-09	1.74821e-18	1.47e-06		1.3222e-09			1.3222e-09
90	270	90	15	0	-6.8749e-13	6.8749e-13	4.72643e-25	1.47e-06		6.8749e-13			-6.8749e-13
90	270	180	15	0	-1.0886e-13	1.0886e-13	1.18505e-26	1.47e-06		1.0886e-13			-1.0886e-13
270	270	330	15	0	-7.243e-08	7.243e-08	5.2461e-15	1.47e-06		7.243e-08			-7.243e-08
270	270	30	15	0	-6.6777e-08	6.6777e-08	4.45917e-15	1.47e-06		6.6777e-08			-6.6777e-08
270	270	90	15	0	1.7753e-07	-1.7753e-07	3.15169e-14	1.47e-06		1.7753e-07			1.7753e-07
270	270	180	15	60	59.9999	0.0001	1e-08	1.47e-06		0.0001			120
330	270	330	15	0	3.4419e-12	-3.4419e-12	1.18467e-23	1.46e-06		3.4419e-12			3.4419e-12
330	270	30	15	0	8.1285e-12	-8.1285e-12	6.60725e-23	1.46e-06		8.1285e-12			8.1285e-12
330	270	90	15	0	-1.8646e-11	1.8646e-11	3.47673e-22	1.46e-06		1.8646e-11			-1.8646e-11
330	270	180	15	0	1.0854e-07	-1.0854e-07	1.17809e-14	1.46e-06		1.0854e-07			1.0854e-07
30	270	330	15	360	360	0.0004	1.6e-07	1.46e-06		0.0004			720
30	270	30	15	0	-1.7008e-13	1.7008e-13	2.89272e-26	1.3e-06		1.7008e-13			-1.7008e-13
30	270	90	15	0	1.5543e-16	-1.5543e-16	2.41585e-32	1.3e-06		1.5543e-16			1.5543e-16
30	270	180	15	0	-1.2577e-12	1.2577e-12	1.58181e-24	1.3e-06		1.2577e-12			-1.2577e-12
180	270	330	15	0	1.7793e-07	-1.7793e-07	3.16591e-14	1.3e-06		1.7793e-07			1.7793e-07
180	270	30	15	30	30	0	0	1.3e-06		0			60
180	270	90	15	0	1.6074e-08	-1.6074e-08	2.58373e-16	1.3e-06		1.6074e-08			1.6074e-08
180	270	180	15	0	2.5846e-09	-2.5846e-09	6.68016e-18	1.3e-06		2.5846e-09			2.5846e-09
90	30	330	25	360	360	0.0004	1.6e-07	1.3e-06		0.0004			720
270	330	30	25	360	360	0.0004	1.6e-07	1.14e-06		0.0004			720
330	90	90	25	0	-8.2953e-09	8.2953e-09	6.8812e-17	9.8e-07		8.2953e-09			-8.2953e-09
30	180	180	25	0	3.5519e-07	-3.5519e-07	1.2616e-13	9.8e-07		3.5519e-07			3.5519e-07
180	270	270	25	0	3.7513e-08	-3.7513e-08	1.40723e-15	9.8e-07		3.7513e-08			3.7513e-08
90	330	30	25	0	-5.523e-13	5.523e-13	3.05035e-25	9.8e-07		5.523e-13			-5.523e-13
90	90	90	25	0	-3.9447e-11	3.9447e-11	1.55607e-21	9.8e-07		3.9447e-11			-3.9447e-11
90	180	180	25	0	-5.1222e-11	5.1222e-11	2.62369e-21	9.8e-07		5.1222e-11			-5.1222e-11
90	270	270	25	0	2.1175e-09	-2.1175e-09	4.48381e-18	9.8e-07		2.1175e-09			2.1175e-09
270	30	330	25	0	-2.2099e-12	2.2099e-12	4.88366e-24	9.8e-07		2.2099e-12			-2.2099e-12
270	90	90	25	0	-1.7389e-09	1.7389e-09	3.02377e-18	9.8e-07		1.7389e-09			-1.7389e-09
270	180	180	25	0	-1.8632e-11	1.8632e-11	3.47151e-22	9.8e-07		1.8632e-11			-1.8632e-11
270	270	270	25	0	-3.6314e-11	3.6314e-11	1.31871e-21	9.8e-07		3.6314e-11			-3.6314e-11
330	30	330	25	0	9.6578e-16	-9.6578e-16	9.32731e-31	9.8e-07		9.6578e-16			9.6578e-16
330	330	30	25	0	4.3875e-08	-4.3875e-08	1.92502e-15	9.8e-07		4.3875e-08			4.3875e-08
330	180	180	25	0	8.7786e-08	-8.7786e-08	7.70638e-15	9.8e-07		8.7786e-08			8.7786e-08
330	270	270	25	0	1.4447e-08	-1.4447e-08	2.08716e-16	9.8e-07		1.4447e-08			1.4447e-08
30	30	330	25	0	4.9545e-08	-4.9545e-08	2.45471e-15	9.8e-07		4.9545e-08			4.9545e-08
30	330	30	25	0	2.6454e-16	-2.6454e-16	6.99814e-32	9.8e-07		2.6454e-16			2.6454e-16
30	90	90	25	0	2.2502e-08	-2.2502e-08	5.0634e-16	9.8e-07		2.2502e-08			2.2502e-08
30	270	270	25	0	2.5623e-08	-2.5623e-08	6.56538e-16	9.8e-07		2.5623e-08			2.5623e-08
180	30	330	25	0	1.58e-08	-1.58e-08	2.4964e-16	9.8e-07		1.58e-08			1.58e-08
180	330	30	25	0	1.5542e-08	-1.5542e-08	2.41554e-16	9.8e-07		1.5542e-08			1.5542e-08
180	90	90	25	0	1.047e-07	-1.047e-07	1.09621e-14	9.8e-07		1.047e-07			1.047e-07
180	180	180	25	0	-1.8739e-11	1.8739e-11	3.5115e-22	9.8e-07		1.8739e-11			-1.8739e-11
90	330	330	25	0	3.1183e-09	-3.1183e-09	9.72379e-18	9.8e-07		3.1183e-09			3.1183e-09
90	330	90	25	0	-1.0984e-13	1.0984e-13	1.20648e-26	9.8e-07		1.0984e-13			-1.0984e-13
90	330	180	25	0	1.202e-09	-1.202e-09	1.4448e-18	9.8e-07		1.202e-09			1.202e-09
90	330	270	25	30	30	0	0	9.8e-07		0			60
270	330	330	25	0	-2.3506e-12	2.3506e-12	5.52532e-24	9.8e-07		2.3506e-12			-2.3506e-12
270	330	90	25	30	30	0	0	9.8e-07		0			60
270	330	180	25	0	5.5189e-09	-5.5189e-09	3.04583e-17	9.8e-07		5.5189e-09			5.5189e-09
270	330	270	25	0	-2.0108e-12	2.0108e-12	4.04332e-24	9.8e-07		2.0108e-12			-2.0108e-12
330	330	330	25	0	-3.3248e-11	3.3248e-11	1.10543e-21	9.8e-07		3.3248e-11			-3.3248e-11
330	330	90	25	0	5.4838e-09	-5.4838e-09	3.00721e-17	9.8e-07		5.4838e-09			5.4838e-09
330	330	180	25	30	30	0	0	9.8e-07		0			60
330	330	270	25	0	1.564e-08	-1.564e-08	2.4461e-16	9.8e-07		1.564e-08			1.564e-08
30	330	330	25	0	3.7488e-08	-3.7488e-08	1.40535e-15	9.8e-07		3.7488e-08			3.7488e-08
30	330	90	25	0	-7.6872e-13	7.6872e-13	5.9093e-25	9.8e-07		7.6872e-13			-7.6872e-13
30	330	180	25	0	1.4448e-08	-1.4448e-08	2.08745e-16	9.8e-07		1.4448e-08			1.4448e-08
30	330	270	25	360	360	0.0004	1.6e-07	9.8e-07		0.0004			720
180	330	330	25	0	5.4575e-08	-5.4575e-08	2.97843e-15	8.2e-07		5.4575e-08			5.4575e-08
180	330	90	25	0	1.2903e-09	-1.2903e-09	1.66487e-18	8.2e-07		1.2903e-09			1.2903e-09
180	330	180	25	0	-2.7665e-13	2.7665e-13	7.65352e-26	8.2e-07		2.7665e-13			-2.7665e-13
180	330	270	25	0	1.3091e-09	-1.3091e-09	1.71374e-18	8.2e-07		1.3091e-09			1.3091e-09
90	30	30	25	0	-8.9943e-13	8.9943e-13	8.08974e-25	8.2e-07		8.9943e-13			-8.9943e-13
90	30	90	25	0	3.6583e-13	-3.6583e-13	1.33832e-25	8.2e-07		3.6583e-13			3.6583e-13
90	30	180	25	0	-5.3371e-09	5.3371e-09	2.84846e-17	8.2e-07		5.3371e-09			-5.3371e-09
90	30	270	25	-30	-30	0	0	8.2e-07		0			-60
270	30	30	25	0	-8.7428e-09	8.7428e-09	7.64366e-17	8.2e-07		8.7428e-09			-8.7428e-09
270	30	90	25	-30	-30	0	0	8.2e-07		0			-60
270	30	180	25	0	-1.8996e-09	1.8996e-09	3.60848e-18	8.2e-07		1.8996e-09			-1.8996e-09
270	30	270	25	0	1.1125e-13	-1.1125e-13	1.23766e-26	8.2e-07		1.1125e-13			1.1125e-13
330	30	30	25	0	1.0472e-07	-1.0472e-07	1.09663e-14	8.2e-07		1.0472e-07			1.0472e-07
330	30	90	25	360	360	0.0004	1.6e-07	8.2e-07		0.0004			720
330	30	180	25	0	1.9612e-07	-1.9612e-07	3.84631e-14	6.6e-07		1.9612e-07			1.9612e-07
330	30	270	25	0	-7.7268e-12	7.7268e-12	5.97034e-23	6.6e-07		7.7268e-12			-7.7268e-12
30	30	30	25	0	-3.1231e-11	3.1231e-11	9.75375e-22	6.6e-07		3.1231e-11			-3.1231e-11
30	30	90	25	0	-1.8447e-09	1.8447e-09	3.40292e-18	6.6e-07		1.8447e-09			-1.8447e-09
30	30	180	25	-30	-30	0	0	6.6e-07		0			-60
30	30	270	25	0	-1.9848e-08	1.9848e-08	3.93943e-16	6.6e-07		1.9848e-08			-1.9848e-08
180	30	30	25	0	2.0655e-08	-2.0655e-08	4.26629e-16	6.6e-07		2.0655e-08			2.0655e-08
180	30	90	25	0	-1.3024e-09	1.3024e-09	1.69625e-18	6.6e-07		1.3024e-09			-1.3024e-09
180	30	180	25	0	1.1332e-12	-1.1332e-12	1.28414e-24	6.6e-07		1.1332e-12			1.1332e-12
180	30	270	25	0	-1.319e-09	1.319e-09	1.73976e-18	6.6e-07		1.319e-09			-1.319e-09
90	90	330	25	0	2.687e-08	-2.687e-08	7.21997e-16	6.6e-07		2.687e-08			2.687e-08
90	90	30	25	0	1.5776e-08	-1.5776e-08	2.48882e-16	6.6e-07		1.5776e-08			1.5776e-08
90	90	180	25	0	5.1989e-08	-5.1989e-08	2.70286e-15	6.6e-07		5.1989e-08			5.1989e-08
90	90	270	25	60	59.9999	0.0001	1e-08	6.6e-07		0.0001			120
270	90	330	25	0	2.894e-08	-2.894e-08	8.37524e-16	6.5e-07		2.894e-08			2.894e-08
270	90	30	25	0	1.5544e-08	-1.5544e-08	2.41616e-16	6.5e-07		1.5544e-08			1.5544e-08
270	90	180	25	0	7.5114e-13	-7.5114e-13	5.64211e-25	6.5e-07		7.5114e-13			7.5114e-13
270	90	270	25	0	-3.1037e-12	3.1037e-12	9.63295e-24	6.5e-07		3.1037e-12			-3.1037e-12
330	90	330	25	0	-3.5214e-12	3.5214e-12	1.24003e-23	6.5e-07		3.5214e-12			-3.5214e-12
330	90	30	25	0	6.8341e-13	-6.8341e-13	4.67049e-25	6.5e-07		6.8341e-13			6.8341e-13
330	90	180	25	0	-9.5668e-11	9.5668e-11	9.15237e-21	6.5e-07		9.5668e-11			-9.5668e-11
330	90	270	25	0	4.2143e-15	-4.2143e-15	1.77603e-29	6.5e-07		4.2143e-15			4.2143e-15
30	90	330	25	0	-2.3032e-11	2.3032e-11	5.30473e-22	6.5e-07		2.3032e-11			-2.3032e-11
30	90	30	25	0	-7.8352e-12	7.8352e-12	6.13904e-23	6.5e-07		7.8352e-12			-7.8352e-12
30	90	180	25	360	360	0.0004	1.6e-07	6.5e-07		0.0004			720
30	90	270	25	0	1.9637e-07	-1.9637e-07	3.85612e-14	4.9e-07		1.9637e-07			1.9637e-07
180	90	330	25	0	-2.9685e-08	2.9685e-08	8.81199e-16	4.9e-07		2.9685e-08			-2.9685e-08
180	90	30	25	360	360	0.0004	1.6e-07	4.9e-07		0.0004			720
180	90	180	25	0	-1.4478e-08	1.4478e-08	2.09612e-16	3.3e-07		1.4478e-08			-1.4478e-08
180	90	270	25	0	2.6373e-09	-2.6373e-09	6.95535e-18	3.3e-07		2.6373e-09			2.6373e-09
90	180	330	25	0	-1.3446e-09	1.3446e-09	1.80795e-18	3.3e-07		1.3446e-09			-1.3446e-09
90	180	30	25	0	1.3056e-09	-1.3056e-09	1.70459e-18	3.3e-07		1.3056e-09			1.3056e-09
90	180	90	25	0	-9.7915e-13	9.7915e-13	9.58735e-25	3.3e-07		9.7915e-13			-9.7915e-13
90	180	270	25	0	5.92e-08	-5.92e-08	3.50464e-15	3.3e-07		5.92e-08			5.92e-08
270	180	330	25	0	-1.3303e-09	1.3303e-09	1.7697e-18	3.3e-07		1.3303e-09			-1.3303e-09
270	180	30	25	0	1.2754e-09	-1.2754e-09	1.62665e-18	3.3e-07		1.2754e-09			1.2754e-09
270	180	90	25	0	1.4633e-08	-1.4633e-08	2.14125e-16	3.3e-07		1.4633e-08			1.4633e-08
270	180	270	25	0	1.456e-13	-1.456e-13	2.11994e-26	3.3e-07		1.456e-13			1.456e-13
330	180	330	25	0	1.4829e-13	-1.4829e-13	2.19899e-26	3.3e-07		1.4829e-13			1.4829e-13
330	180	30	25	0	-1.4401e-13	1.4401e-13	2.07389e-26	3.3e-07		1.4401e-13			-1.4401e-13
330	180	90	25	0	6.229e-12	-6.229e-12	3.88004e-23	3.3e-07		6.229e-12			6.229e-12
330	180	270	25	0	-3.158e-12	3.158e-12	9.97296e-24	3.3e-07		3.158e-12			-3.158e-12
30	180	330	25	0	-4.209e-11	4.209e-11	1.77157e-21	3.3e-07		4.209e-11			-4.209e-11
30	180	30	25	0	-1.622e-13	1.622e-13	2.63088e-26	3.3e-07		1.622e-13			-1.622e-13
30	180	90	25	0	-2.217e-11	2.217e-11	4.91509e-22	3.3e-07		2.217e-11			-2.217e-11
30	180	270	25	0	-1.9761e-10	1.9761e-10	3.90497e-20	3.3e-07		1.9761e-10			-1.9761e-10
180	180	330	25	-30	-30	0	0	3.3e-07		0			-60
180	180	30	25	30	30	0	0	3.3e-07		0			60
180	180	90	25	0	2.3116e-08	-2.3116e-08	5.34349e-16	3.3e-07		2.3116e-08			2.3116e-08
180	180	270	25	0	-3.1125e-09	3.1125e-09	9.68766e-18	3.3e-07		3.1125e-09			-3.1125e-09
90	270	330	25	0	1.5778e-08	-1.5778e-08	2.48945e-16	3.3e-07		1.5778e-08			1.5778e-08
90	270	30	25	0	-9.5184e-13	9.5184e-13	9.05999e-25	3.3e-07		9.5184e-13			-9.5184e-13
90	270	90	25	0	-9.1624e-14	9.1624e-14	8.39496e-27	3.3e-07		9.1624e-14			-9.1624e-14
90	270	180	25	0	-7.2917e-14	7.2917e-14	5.31689e-27	3.3e-07		7.2917e-14			-7.2917e-14
270	270	330	25	0	1.5571e-08	-1.5571e-08	2.42456e-16	3.3e-07		1.5571e-08			1.5571e-08
270	270	30	25	0	4.3133e-08	-4.3133e-08	1.86046e-15	3.3e-07		4.3133e-08			4.3133e-08
270	270	90	25	60	59.9999	0.0001	1e-08	3.3e-07		0.0001			120
270	270	180	25	0	7.6524e-08	-7.6524e-08	5.85592e-15	3.2e-07		7.6524e-08			7.6524e-08
330	270	330	25	0	-3.0421e-12	3.0421e-12	9.25437e-24	3.2e-07		3.0421e-12			-3.0421e-12
330	270	30	25	0	-1.1057e-11	1.1057e-11	1.22257e-22	3.2e-07		1.1057e-11			-1.1057e-11
330	270	90	25	0	2.981e-08	-2.981e-08	8.88636e-16	3.2e-07		2.981e-08			2.981e-08
330	270	180	25	360	360	0.0004	1.6e-07	3.2e-07		0.0004			720
30	270	330	25	0	1.7359e-07	-1.7359e-07	3.01335e-14	1.6e-07		1.7359e-07			1.7359e-07
30	270	30	25	0	1.2101e-16	-1.2101e-16	1.46434e-32	1.6e-07		1.2101e-16			1.2101e-16
30	270	90	25	0	5.4506e-15	-5.4506e-15	2.9709e-29	1.6e-07		5.4506e-15			5.4506e-15
30	270	180	25	0	-8.7262e-11	8.7262e-11	7.61466e-21	1.6e-07		8.7262e-11			-8.7262e-11
180	270	330	25	360	360	0.0004	1.6e-07	1.6e-07		0.0004			720
180	270	30	25	0	2.1705e-08	-2.1705e-08	4.71107e-16	4.77767e-16		2.1705e-08			2.1705e-08
180	270	90	25	0	2.5806e-09	-2.5806e-09	6.6595e-18	6.65952e-18		2.5806e-09			2.5806e-09
180	270	180	25	0	-4.4424e-12	4.4424e-12	1.97349e-23	1.97349e-23		4.4424e-12			-4.4424e-12
