# Supplementary material for: The Neural-Fuzzy Approach as a Way of Preventing a Maritime Vessel Accident in a Heavy Traffic Zone
Source: Hindawi journal article supplement (doi:10.1155/2018/2367096), 2018-08-15
Supplement: f5 [file 2367096.f5.xlsx]

## Sheet: Лист1
1 input LV	2 input LV	3 input LV	4 input LV	Known value LV output	out	(output-out)	G1^2	sum	RMSE	|output-out|	sum	MAE	output+out	sum	SMAPE
90	330	0	0	0	5.5139e-16	-5.5139e-16	3.04031e-31	1.93007e-06	6.06327e-05	5.5139e-16	0.00611938	1.1656e-05	5.5139e-16	9779.99	6.25704e-07
270	330	0	0	0	1.3069e-07	-1.3069e-07	1.70799e-14	1.93007e-06		1.3069e-07			1.3069e-07
330	330	0	0	30	30	0	0	1.93007e-06		0			60
30	330	0	0	0	1.319e-19	-1.319e-19	1.73976e-38	1.93007e-06		1.319e-19			1.319e-19
180	330	0	0	0	-5.9723e-12	5.9723e-12	3.56684e-23	1.93007e-06		5.9723e-12			-5.9723e-12
90	30	0	0	0	5.7781e-09	-5.7781e-09	3.33864e-17	1.93007e-06		5.7781e-09			5.7781e-09
270	30	0	0	0	-3.2933e-14	3.2933e-14	1.08458e-27	1.93007e-06		3.2933e-14			-3.2933e-14
330	30	0	0	0	2.7331e-10	-2.7331e-10	7.46984e-20	1.93007e-06		2.7331e-10			2.7331e-10
30	30	0	0	30	30	0	0	1.93007e-06		0			60
180	30	0	0	0	-1.4799e-12	1.4799e-12	2.1901e-24	1.93007e-06		1.4799e-12			-1.4799e-12
90	90	0	0	30	30	0	0	1.93007e-06		0			60
270	90	0	0	0	-8.631e-12	8.631e-12	7.44942e-23	1.93007e-06		8.631e-12			-8.631e-12
330	90	0	0	0	6.0546e-14	-6.0546e-14	3.66582e-27	1.93007e-06		6.0546e-14			6.0546e-14
30	90	0	0	0	5.7788e-09	-5.7788e-09	3.33945e-17	1.93007e-06		5.7788e-09			5.7788e-09
180	90	0	0	0	3.0498e-08	-3.0498e-08	9.30128e-16	1.93007e-06		3.0498e-08			3.0498e-08
90	180	0	0	0	3.0507e-08	-3.0507e-08	9.30677e-16	1.93007e-06		3.0507e-08			3.0507e-08
270	180	0	0	0	8.7398e-09	-8.7398e-09	7.63841e-17	1.93007e-06		8.7398e-09			8.7398e-09
330	180	0	0	0	-1.3982e-12	1.3982e-12	1.95496e-24	1.93007e-06		1.3982e-12			-1.3982e-12
30	180	0	0	0	-5.4219e-12	5.4219e-12	2.9397e-23	1.93007e-06		5.4219e-12			-5.4219e-12
180	180	0	0	30	30	0	0	1.93007e-06		0			60
90	270	0	0	0	-7.4608e-12	7.4608e-12	5.56635e-23	1.93007e-06		7.4608e-12			-7.4608e-12
270	270	0	0	30	30	0	0	1.93007e-06		0			60
330	270	0	0	0	5.8764e-09	-5.8764e-09	3.45321e-17	1.93007e-06		5.8764e-09			5.8764e-09
30	270	0	0	0	1.3238e-15	-1.3238e-15	1.75245e-30	1.93007e-06		1.3238e-15			1.3238e-15
180	270	0	0	0	8.6741e-09	-8.6741e-09	7.524e-17	1.93007e-06		8.6741e-09			8.6741e-09
90	30	330	5	-30	-30	0	0	1.93007e-06		0			-60
270	330	30	5	0	-7.9642e-06	7.9642e-06	6.34285e-11	1.93007e-06		7.9642e-06			-7.9642e-06
330	90	90	5	0	1.3921e-08	-1.3921e-08	1.93794e-16	1.93e-06		1.3921e-08			1.3921e-08
30	180	180	5	0	2.7011e-08	-2.7011e-08	7.29594e-16	1.93e-06		2.7011e-08			2.7011e-08
180	270	270	5	0	-5.497e-09	5.497e-09	3.0217e-17	1.93e-06		5.497e-09			-5.497e-09
90	330	30	5	0	-1.1911e-14	1.1911e-14	1.41872e-28	1.93e-06		1.1911e-14			-1.1911e-14
90	90	90	5	30	30	0	0	1.93e-06		0			60
90	180	180	5	0	-2.5811e-08	2.5811e-08	6.66208e-16	1.93e-06		2.5811e-08			-2.5811e-08
90	270	270	5	0	-1.2647e-11	1.2647e-11	1.59947e-22	1.93e-06		1.2647e-11			-1.2647e-11
270	30	330	5	0	1.0394e-12	-1.0394e-12	1.08035e-24	1.93e-06		1.0394e-12			1.0394e-12
270	90	90	5	0	-1.6029e-11	1.6029e-11	2.56929e-22	1.93e-06		1.6029e-11			-1.6029e-11
270	180	180	5	0	7.8697e-09	-7.8697e-09	6.19322e-17	1.93e-06		7.8697e-09			7.8697e-09
270	270	270	5	30	30	0	0	1.93e-06		0			60
330	30	330	5	0	-5.1138e-16	5.1138e-16	2.6151e-31	1.93e-06		5.1138e-16			-5.1138e-16
330	330	30	5	0	5.6008e-07	-5.6008e-07	3.1369e-13	1.93e-06		5.6008e-07			5.6008e-07
330	180	180	5	0	-6.6812e-09	6.6812e-09	4.46384e-17	1.93e-06		6.6812e-09			-6.6812e-09
330	270	270	5	0	4.1956e-09	-4.1956e-09	1.76031e-17	1.93e-06		4.1956e-09			4.1956e-09
30	30	330	5	0	-2.5484e-09	2.5484e-09	6.49434e-18	1.93e-06		2.5484e-09			-2.5484e-09
30	330	30	5	0	-1.1138e-17	1.1138e-17	1.24055e-34	1.93e-06		1.1138e-17			-1.1138e-17
30	90	90	5	0	3.909e-09	-3.909e-09	1.52803e-17	1.93e-06		3.909e-09			3.909e-09
30	270	270	5	0	-1.6597e-09	1.6597e-09	2.7546e-18	1.93e-06		1.6597e-09			-1.6597e-09
180	30	330	5	0	-1.7227e-09	1.7227e-09	2.9677e-18	1.93e-06		1.7227e-09			-1.7227e-09
180	330	30	5	0	3.4365e-10	-3.4365e-10	1.18095e-19	1.93e-06		3.4365e-10			3.4365e-10
180	90	90	5	0	2.8218e-08	-2.8218e-08	7.96256e-16	1.93e-06		2.8218e-08			2.8218e-08
180	180	180	5	30	30	0	0	1.93e-06		0			60
90	330	330	5	0	1.0837e-12	-1.0837e-12	1.17441e-24	1.93e-06		1.0837e-12			1.0837e-12
90	330	90	5	0	3.3214e-16	-3.3214e-16	1.10317e-31	1.93e-06		3.3214e-16			3.3214e-16
90	330	180	5	0	1.289e-13	-1.289e-13	1.66152e-26	1.93e-06		1.289e-13			1.289e-13
90	330	270	5	0	-3.2226e-09	3.2226e-09	1.03852e-17	1.93e-06		3.2226e-09			-3.2226e-09
270	330	330	5	0	1.3864e-09	-1.3864e-09	1.9221e-18	1.93e-06		1.3864e-09			1.3864e-09
270	330	90	5	0	9.5632e-09	-9.5632e-09	9.14548e-17	1.93e-06		9.5632e-09			9.5632e-09
270	330	180	5	0	5.2945e-09	-5.2945e-09	2.80317e-17	1.93e-06		5.2945e-09			5.2945e-09
270	330	270	5	0	5.295e-09	-5.295e-09	2.8037e-17	1.93e-06		5.295e-09			5.295e-09
330	330	330	5	30	30	0	0	1.93e-06		0			60
330	330	90	5	30	30	0	0	1.93e-06		0			60
330	330	180	5	30	30	0	0	1.93e-06		0			60
330	330	270	5	30	30	0	0	1.93e-06		0			60
30	330	330	5	0	-2.4387e-09	2.4387e-09	5.94726e-18	1.93e-06		2.4387e-09			-2.4387e-09
30	330	90	5	0	5.0028e-14	-5.0028e-14	2.5028e-27	1.93e-06		5.0028e-14			5.0028e-14
30	330	180	5	0	-9.4017e-10	9.4017e-10	8.8392e-19	1.93e-06		9.4017e-10			-9.4017e-10
30	330	270	5	-30	-30	0	0	1.93e-06		0			-60
180	330	330	5	0	-1.7067e-08	1.7067e-08	2.91282e-16	1.93e-06		1.7067e-08			-1.7067e-08
180	330	90	5	0	-7.1656e-13	7.1656e-13	5.13458e-25	1.93e-06		7.1656e-13			-7.1656e-13
180	330	180	5	0	-5.3234e-13	5.3234e-13	2.83386e-25	1.93e-06		5.3234e-13			-5.3234e-13
180	330	270	5	0	2.0134e-12	-2.0134e-12	4.05378e-24	1.93e-06		2.0134e-12			2.0134e-12
90	30	30	5	0	5.2433e-09	-5.2433e-09	2.74922e-17	1.93e-06		5.2433e-09			5.2433e-09
90	30	90	5	0	-2.2e-09	2.2e-09	4.84e-18	1.93e-06		2.2e-09			-2.2e-09
90	30	180	5	0	-5.3464e-09	5.3464e-09	2.8584e-17	1.93e-06		5.3464e-09			-5.3464e-09
90	30	270	5	0	2.8146e-09	-2.8146e-09	7.92197e-18	1.93e-06		2.8146e-09			2.8146e-09
270	30	30	5	0	1.9428e-12	-1.9428e-12	3.77447e-24	1.93e-06		1.9428e-12			1.9428e-12
270	30	90	5	0	-6.6838e-09	6.6838e-09	4.46732e-17	1.93e-06		6.6838e-09			-6.6838e-09
270	30	180	5	0	1.289e-11	-1.289e-11	1.66152e-22	1.93e-06		1.289e-11			1.289e-11
270	30	270	5	0	-3.837e-16	3.837e-16	1.47226e-31	1.93e-06		3.837e-16			-3.837e-16
330	30	30	5	0	-1.5943e-08	1.5943e-08	2.54179e-16	1.93e-06		1.5943e-08			-1.5943e-08
330	30	90	5	-60	-59.9999	-0.0001	1e-08	1.93e-06		0.0001			-120
330	30	180	5	0	-1.0582e-07	1.0582e-07	1.11979e-14	1.92e-06		1.0582e-07			-1.0582e-07
330	30	270	5	0	4.2223e-12	-4.2223e-12	1.78278e-23	1.92e-06		4.2223e-12			4.2223e-12
30	30	30	5	30	30	0	0	1.92e-06		0			60
30	30	90	5	-30	-30	0	0	1.92e-06		0			-60
30	30	180	5	-30	-30	0	0	1.92e-06		0			-60
30	30	270	5	30	30	0	0	1.92e-06		0			60
180	30	30	5	0	-1.3448e-12	1.3448e-12	1.80849e-24	1.92e-06		1.3448e-12			-1.3448e-12
180	30	90	5	0	-7.9667e-13	7.9667e-13	6.34683e-25	1.92e-06		7.9667e-13			-7.9667e-13
180	30	180	5	0	-1.4119e-12	1.4119e-12	1.99346e-24	1.92e-06		1.4119e-12			-1.4119e-12
180	30	270	5	0	1.0327e-12	-1.0327e-12	1.06647e-24	1.92e-06		1.0327e-12			1.0327e-12
90	90	330	5	30	30	0	0	1.92e-06		0			60
90	90	30	5	30	30	0	0	1.92e-06		0			60
90	90	180	5	-30	-30	0	0	1.92e-06		0			-60
90	90	270	5	60	59.9999	0.0001	1e-08	1.92e-06		0.0001			120
270	90	330	5	0	-1.7063e-08	1.7063e-08	2.91146e-16	1.91e-06		1.7063e-08			-1.7063e-08
270	90	30	5	0	5.5188e-12	-5.5188e-12	3.04572e-23	1.91e-06		5.5188e-12			5.5188e-12
270	90	180	5	0	-8.0575e-12	8.0575e-12	6.49233e-23	1.91e-06		8.0575e-12			-8.0575e-12
270	90	270	5	0	-3.7019e-12	3.7019e-12	1.37041e-23	1.91e-06		3.7019e-12			-3.7019e-12
330	90	330	5	0	2.0782e-12	-2.0782e-12	4.31892e-24	1.91e-06		2.0782e-12			2.0782e-12
330	90	30	5	0	-4.0468e-12	4.0468e-12	1.63766e-23	1.91e-06		4.0468e-12			-4.0468e-12
330	90	180	5	0	1.1569e-11	-1.1569e-11	1.33842e-22	1.91e-06		1.1569e-11			1.1569e-11
330	90	270	5	0	3.0437e-16	-3.0437e-16	9.26411e-32	1.91e-06		3.0437e-16			3.0437e-16
30	90	330	5	0	3.7823e-09	-3.7823e-09	1.43058e-17	1.91e-06		3.7823e-09			3.7823e-09
30	90	30	5	0	5.2428e-09	-5.2428e-09	2.7487e-17	1.91e-06		5.2428e-09			5.2428e-09
30	90	180	5	30	30	0	0	1.91e-06		0			60
30	90	270	5	0	-9.2197e-08	9.2197e-08	8.50029e-15	1.91e-06		9.2197e-08			-9.2197e-08
180	90	330	5	0	-2.5809e-08	2.5809e-08	6.66104e-16	1.91e-06		2.5809e-08			-2.5809e-08
180	90	30	5	0	2.7702e-08	-2.7702e-08	7.67401e-16	1.91e-06		2.7702e-08			2.7702e-08
180	90	180	5	0	3.4344e-08	-3.4344e-08	1.17951e-15	1.91e-06		3.4344e-08			3.4344e-08
180	90	270	5	0	-2.4612e-08	2.4612e-08	6.05751e-16	1.91e-06		2.4612e-08			-2.4612e-08
90	180	330	5	0	2.5811e-08	-2.5811e-08	6.66208e-16	1.91e-06		2.5811e-08			2.5811e-08
90	180	30	5	0	2.7675e-08	-2.7675e-08	7.65906e-16	1.91e-06		2.7675e-08			2.7675e-08
90	180	90	5	0	2.822e-08	-2.822e-08	7.96368e-16	1.91e-06		2.822e-08			2.822e-08
90	180	270	5	0	5.2855e-08	-5.2855e-08	2.79365e-15	1.91e-06		5.2855e-08			5.2855e-08
270	180	330	5	0	-7.8486e-09	7.8486e-09	6.16005e-17	1.91e-06		7.8486e-09			-7.8486e-09
270	180	30	5	0	-5.6618e-09	5.6618e-09	3.2056e-17	1.91e-06		5.6618e-09			-5.6618e-09
270	180	90	5	0	1.4547e-08	-1.4547e-08	2.11615e-16	1.91e-06		1.4547e-08			1.4547e-08
270	180	270	5	0	5.4955e-09	-5.4955e-09	3.02005e-17	1.91e-06		5.4955e-09			5.4955e-09
330	180	330	5	0	6.2654e-13	-6.2654e-13	3.92552e-25	1.91e-06		6.2654e-13			6.2654e-13
330	180	30	5	0	7.1267e-13	-7.1267e-13	5.07899e-25	1.91e-06		7.1267e-13			7.1267e-13
330	180	90	5	0	-1.6182e-11	1.6182e-11	2.61857e-22	1.91e-06		1.6182e-11			-1.6182e-11
330	180	270	5	0	-7.31e-13	7.31e-13	5.34361e-25	1.91e-06		7.31e-13			-7.31e-13
30	180	330	5	0	2.1369e-11	-2.1369e-11	4.56634e-22	1.91e-06		2.1369e-11			2.1369e-11
30	180	30	5	0	-4.9178e-12	4.9178e-12	2.41848e-23	1.91e-06		4.9178e-12			-4.9178e-12
30	180	90	5	0	-4.4114e-12	4.4114e-12	1.94604e-23	1.91e-06		4.4114e-12			-4.4114e-12
30	180	270	5	0	9.1653e-11	-9.1653e-11	8.40027e-21	1.91e-06		9.1653e-11			9.1653e-11
180	180	330	5	-30	-30	0	0	1.91e-06		0			-60
180	180	30	5	30	30	0	0	1.91e-06		0			60
180	180	90	5	30	30	0	0	1.91e-06		0			60
180	180	270	5	-30	-30	0	0	1.91e-06		0			-60
90	270	330	5	0	7.8583e-12	-7.8583e-12	6.17529e-23	1.91e-06		7.8583e-12			7.8583e-12
90	270	30	5	0	-6.304e-12	6.304e-12	3.97404e-23	1.91e-06		6.304e-12			-6.304e-12
90	270	90	5	0	-6.9392e-12	6.9392e-12	4.81525e-23	1.91e-06		6.9392e-12			-6.9392e-12
90	270	180	5	0	6.2274e-12	-6.2274e-12	3.87805e-23	1.91e-06		6.2274e-12			6.2274e-12
270	270	330	5	-30	-30	0	0	1.91e-06		0			-60
270	270	30	5	-30	-30	0	0	1.91e-06		0			-60
270	270	90	5	60	59.9999	0.0001	1e-08	1.91e-06		0.0001			120
270	270	180	5	30	30	0	0	1.9e-06		0			60
330	270	330	5	0	-1.3877e-09	1.3877e-09	1.92571e-18	1.9e-06		1.3877e-09			-1.3877e-09
330	270	30	5	0	-3.4513e-09	3.4513e-09	1.19115e-17	1.9e-06		3.4513e-09			-3.4513e-09
330	270	90	5	0	6.9236e-09	-6.9236e-09	4.79362e-17	1.9e-06		6.9236e-09			6.9236e-09
330	270	180	5	-30	-30	0	0	1.9e-06		0			-60
30	270	330	5	0	-1.024e-07	1.024e-07	1.04858e-14	1.9e-06		1.024e-07			-1.024e-07
30	270	30	5	0	1.1409e-15	-1.1409e-15	1.30165e-30	1.9e-06		1.1409e-15			1.1409e-15
30	270	90	5	0	1.0789e-15	-1.0789e-15	1.16403e-30	1.9e-06		1.0789e-15			1.0789e-15
30	270	180	5	0	-6.4971e-12	6.4971e-12	4.22123e-23	1.9e-06		6.4971e-12			-6.4971e-12
180	270	330	5	0	-7.8147e-09	7.8147e-09	6.10695e-17	1.9e-06		7.8147e-09			-7.8147e-09
180	270	30	5	0	-3.2031e-09	3.2031e-09	1.02598e-17	1.9e-06		3.2031e-09			-3.2031e-09
180	270	90	5	0	9.0484e-09	-9.0484e-09	8.18735e-17	1.9e-06		9.0484e-09			9.0484e-09
180	270	180	5	0	7.8608e-09	-7.8608e-09	6.17922e-17	1.9e-06		7.8608e-09			7.8608e-09
90	30	330	10	60	59.9999	0.0001	1e-08	1.9e-06		0.0001			120
270	330	30	10	-60	-59.9999	-0.0001	1e-08	1.89e-06		0.0001			-120
330	90	90	10	0	-1.6634e-07	1.6634e-07	2.7669e-14	1.88e-06		1.6634e-07			-1.6634e-07
30	180	180	10	0	3.2945e-08	-3.2945e-08	1.08537e-15	1.88e-06		3.2945e-08			3.2945e-08
180	270	270	10	0	-5.7045e-09	5.7045e-09	3.25413e-17	1.88e-06		5.7045e-09			-5.7045e-09
90	330	30	10	0	1.1564e-13	-1.1564e-13	1.33726e-26	1.88e-06		1.1564e-13			1.1564e-13
90	90	90	10	30	30	0	0	1.88e-06		0			60
90	180	180	10	0	-3.1495e-08	3.1495e-08	9.91935e-16	1.88e-06		3.1495e-08			-3.1495e-08
90	270	270	10	0	-1.4993e-11	1.4993e-11	2.2479e-22	1.88e-06		1.4993e-11			-1.4993e-11
270	30	330	10	0	-9.446e-12	9.446e-12	8.92269e-23	1.88e-06		9.446e-12			-9.446e-12
270	90	90	10	0	2.7806e-12	-2.7806e-12	7.73174e-24	1.88e-06		2.7806e-12			2.7806e-12
270	180	180	10	0	9.5533e-09	-9.5533e-09	9.12655e-17	1.88e-06		9.5533e-09			9.5533e-09
270	270	270	10	30	30	0	0	1.88e-06		0			60
330	30	330	10	0	4.7044e-15	-4.7044e-15	2.21314e-29	1.88e-06		4.7044e-15			4.7044e-15
330	330	30	10	0	-6.1702e-08	6.1702e-08	3.80714e-15	1.88e-06		6.1702e-08			-6.1702e-08
330	180	180	10	0	-8.1481e-09	8.1481e-09	6.63915e-17	1.88e-06		8.1481e-09			-8.1481e-09
330	270	270	10	0	5.1109e-09	-5.1109e-09	2.61213e-17	1.88e-06		5.1109e-09			5.1109e-09
30	30	330	10	0	1.4313e-08	-1.4313e-08	2.04862e-16	1.88e-06		1.4313e-08			1.4313e-08
30	330	30	10	0	-5.2968e-17	5.2968e-17	2.80561e-33	1.88e-06		5.2968e-17			-5.2968e-17
30	90	90	10	0	4.7692e-09	-4.7692e-09	2.27453e-17	1.88e-06		4.7692e-09			4.7692e-09
30	270	270	10	0	-5.1491e-09	5.1491e-09	2.65132e-17	1.88e-06		5.1491e-09			-5.1491e-09
180	30	330	10	0	3.4488e-09	-3.4488e-09	1.18942e-17	1.88e-06		3.4488e-09			3.4488e-09
180	330	30	10	0	-3.242e-09	3.242e-09	1.05106e-17	1.88e-06		3.242e-09			-3.242e-09
180	90	90	10	0	3.4332e-08	-3.4332e-08	1.17869e-15	1.88e-06		3.4332e-08			3.4332e-08
180	180	180	10	30	30	0	0	1.88e-06		0			60
90	330	330	10	0	-6.0942e-12	6.0942e-12	3.71393e-23	1.88e-06		6.0942e-12			-6.0942e-12
90	330	90	10	0	3.5471e-16	-3.5471e-16	1.25819e-31	1.88e-06		3.5471e-16			3.5471e-16
90	330	180	10	0	3.9185e-13	-3.9185e-13	1.53546e-25	1.88e-06		3.9185e-13			3.9185e-13
90	330	270	10	0	-9.7845e-09	9.7845e-09	9.57364e-17	1.88e-06		9.7845e-09			-9.7845e-09
270	330	330	10	0	1.6832e-09	-1.6832e-09	2.83316e-18	1.88e-06		1.6832e-09			1.6832e-09
270	330	90	10	0	-1.2991e-08	1.2991e-08	1.68766e-16	1.88e-06		1.2991e-08			-1.2991e-08
270	330	180	10	0	6.4455e-09	-6.4455e-09	4.15445e-17	1.88e-06		6.4455e-09			6.4455e-09
270	330	270	10	0	6.4469e-09	-6.4469e-09	4.15625e-17	1.88e-06		6.4469e-09			6.4469e-09
330	330	330	10	30	30	0	0	1.88e-06		0			60
330	330	90	10	30	30	0	0	1.88e-06		0			60
330	330	180	10	30	30	0	0	1.88e-06		0			60
330	330	270	10	30	30	0	0	1.88e-06		0			60
30	330	330	10	0	-7.46e-09	7.46e-09	5.56516e-17	1.88e-06		7.46e-09			-7.46e-09
30	330	90	10	0	1.5115e-13	-1.5115e-13	2.28463e-26	1.88e-06		1.5115e-13			1.5115e-13
30	330	180	10	0	-2.8408e-09	2.8408e-09	8.07014e-18	1.88e-06		2.8408e-09			-2.8408e-09
30	330	270	10	-60	-59.9999	-0.0001	1e-08	1.88e-06		0.0001			-120
180	330	330	10	0	1.6249e-07	-1.6249e-07	2.6403e-14	1.87e-06		1.6249e-07			1.6249e-07
180	330	90	10	0	1.9201e-13	-1.9201e-13	3.68678e-26	1.87e-06		1.9201e-13			1.9201e-13
180	330	180	10	0	-6.4817e-13	6.4817e-13	4.20124e-25	1.87e-06		6.4817e-13			-6.4817e-13
180	330	270	10	0	-1.6422e-11	1.6422e-11	2.69682e-22	1.87e-06		1.6422e-11			-1.6422e-11
90	30	30	10	0	6.5364e-09	-6.5364e-09	4.27245e-17	1.87e-06		6.5364e-09			6.5364e-09
90	30	90	10	0	-2.6828e-09	2.6828e-09	7.19742e-18	1.87e-06		2.6828e-09			-2.6828e-09
90	30	180	10	0	-6.5201e-09	6.5201e-09	4.25117e-17	1.87e-06		6.5201e-09			-6.5201e-09
90	30	270	10	0	1.669e-08	-1.669e-08	2.78556e-16	1.87e-06		1.669e-08			1.669e-08
270	30	30	10	0	2.3573e-12	-2.3573e-12	5.55686e-24	1.87e-06		2.3573e-12			2.3573e-12
270	30	90	10	0	-8.1116e-09	8.1116e-09	6.57981e-17	1.87e-06		8.1116e-09			-8.1116e-09
270	30	180	10	0	-1.1824e-10	1.1824e-10	1.39807e-20	1.87e-06		1.1824e-10			-1.1824e-10
270	30	270	10	0	6.0202e-15	-6.0202e-15	3.62428e-29	1.87e-06		6.0202e-15			6.0202e-15
330	30	30	10	0	-1.9435e-08	1.9435e-08	3.77719e-16	1.87e-06		1.9435e-08			-1.9435e-08
330	30	90	10	-60	-59.9999	-0.0001	1e-08	1.87e-06		0.0001			-120
330	30	180	10	0	9.7072e-07	-9.7072e-07	9.42297e-13	1.86e-06		9.7072e-07			9.7072e-07
330	30	270	10	0	-3.8942e-11	3.8942e-11	1.51648e-21	1.86e-06		3.8942e-11			-3.8942e-11
30	30	30	10	30	30	0	0	1.86e-06		0			60
30	30	90	10	-30	-30	0	0	1.86e-06		0			-60
30	30	180	10	-30	-30	0	0	1.86e-06		0			-60
30	30	270	10	30	30	0	0	1.86e-06		0			60
180	30	30	10	0	-1.6525e-12	1.6525e-12	2.73076e-24	1.86e-06		1.6525e-12			-1.6525e-12
180	30	90	10	0	-9.6982e-13	9.6982e-13	9.40551e-25	1.86e-06		9.6982e-13			-9.6982e-13
180	30	180	10	0	3.5427e-12	-3.5427e-12	1.25507e-23	1.86e-06		3.5427e-12			3.5427e-12
180	30	270	10	0	6.7819e-13	-6.7819e-13	4.59942e-25	1.86e-06		6.7819e-13			6.7819e-13
90	90	330	10	30	30	0	0	1.86e-06		0			60
90	90	30	10	30	30	0	0	1.86e-06		0			60
90	90	180	10	-30	-30	0	0	1.86e-06		0			-60
90	90	270	10	60	59.9999	0.0001	1e-08	1.86e-06		0.0001			120
270	90	330	10	0	1.6253e-07	-1.6253e-07	2.6416e-14	1.85e-06		1.6253e-07			1.6253e-07
270	90	30	10	0	6.5302e-12	-6.5302e-12	4.26435e-23	1.85e-06		6.5302e-12			6.5302e-12
270	90	180	10	0	-5.8242e-12	5.8242e-12	3.39213e-23	1.85e-06		5.8242e-12			-5.8242e-12
270	90	270	10	0	-2.3638e-11	2.3638e-11	5.58755e-22	1.85e-06		2.3638e-11			-2.3638e-11
330	90	330	10	0	-1.9792e-11	1.9792e-11	3.91723e-22	1.85e-06		1.9792e-11			-1.9792e-11
330	90	30	10	0	4.8334e-11	-4.8334e-11	2.33618e-21	1.85e-06		4.8334e-11			4.8334e-11
330	90	180	10	0	-3.7554e-11	3.7554e-11	1.4103e-21	1.85e-06		3.7554e-11			-3.7554e-11
330	90	270	10	0	4.8378e-15	-4.8378e-15	2.34043e-29	1.85e-06		4.8378e-15			4.8378e-15
30	90	330	10	0	4.4982e-09	-4.4982e-09	2.02338e-17	1.85e-06		4.4982e-09			4.4982e-09
30	90	30	10	0	6.5346e-09	-6.5346e-09	4.2701e-17	1.85e-06		6.5346e-09			6.5346e-09
30	90	180	10	30	30	0	0	1.85e-06		0			60
30	90	270	10	0	9.8754e-07	-9.8754e-07	9.75235e-13	1.85e-06		9.8754e-07			9.8754e-07
180	90	330	10	0	-3.1486e-08	3.1486e-08	9.91368e-16	1.85e-06		3.1486e-08			-3.1486e-08
180	90	30	10	0	3.414e-08	-3.414e-08	1.16554e-15	1.85e-06		3.414e-08			3.414e-08
180	90	180	10	0	-4.9765e-08	4.9765e-08	2.47656e-15	1.85e-06		4.9765e-08			-4.9765e-08
180	90	270	10	0	-3.0015e-08	3.0015e-08	9.009e-16	1.85e-06		3.0015e-08			-3.0015e-08
90	180	330	10	0	3.1479e-08	-3.1479e-08	9.90927e-16	1.85e-06		3.1479e-08			3.1479e-08
90	180	30	10	0	3.4501e-08	-3.4501e-08	1.19032e-15	1.85e-06		3.4501e-08			3.4501e-08
90	180	90	10	0	3.442e-08	-3.442e-08	1.18474e-15	1.85e-06		3.442e-08			3.442e-08
90	180	270	10	0	6.4442e-08	-6.4442e-08	4.15277e-15	1.85e-06		6.4442e-08			6.4442e-08
270	180	330	10	0	-9.755e-09	9.755e-09	9.516e-17	1.85e-06		9.755e-09			-9.755e-09
270	180	30	10	0	-6.6882e-09	6.6882e-09	4.4732e-17	1.85e-06		6.6882e-09			-6.6882e-09
270	180	90	10	0	1.7741e-08	-1.7741e-08	3.14743e-16	1.85e-06		1.7741e-08			1.7741e-08
270	180	270	10	0	6.7024e-09	-6.7024e-09	4.49222e-17	1.85e-06		6.7024e-09			6.7024e-09
330	180	330	10	0	7.8631e-13	-7.8631e-13	6.18283e-25	1.85e-06		7.8631e-13			7.8631e-13
330	180	30	10	0	7.8149e-13	-7.8149e-13	6.10727e-25	1.85e-06		7.8149e-13			7.8149e-13
330	180	90	10	0	1.60885e-10	-1.60885e-10	2.5884e-20	1.85e-06		1.60885e-10			1.60885e-10
330	180	270	10	0	-8.9046e-13	8.9046e-13	7.92919e-25	1.85e-06		8.9046e-13			-8.9046e-13
30	180	330	10	0	-2.4168e-10	2.4168e-10	5.84092e-20	1.85e-06		2.4168e-10			-2.4168e-10
30	180	30	10	0	-6.1326e-12	6.1326e-12	3.76088e-23	1.85e-06		6.1326e-12			-6.1326e-12
30	180	90	10	0	-5.3795e-12	5.3795e-12	2.8939e-23	1.85e-06		5.3795e-12			-5.3795e-12
30	180	270	10	0	-9.7127e-10	9.7127e-10	9.43365e-19	1.85e-06		9.7127e-10			-9.7127e-10
180	180	330	10	-30	-30	0	0	1.85e-06		0			-60
180	180	30	10	30	30	0	0	1.85e-06		0			60
180	180	90	10	30	30	0	0	1.85e-06		0			60
180	180	270	10	-30	-30	0	0	1.85e-06		0			-60
90	270	330	10	0	-1.4169e-10	1.4169e-10	2.00761e-20	1.85e-06		1.4169e-10			-1.4169e-10
90	270	30	10	0	-1.1893e-11	1.1893e-11	1.41443e-22	1.85e-06		1.1893e-11			-1.1893e-11
90	270	90	10	0	-8.46e-12	8.46e-12	7.15716e-23	1.85e-06		8.46e-12			-8.46e-12
90	270	180	10	0	7.5968e-12	-7.5968e-12	5.77114e-23	1.85e-06		7.5968e-12			7.5968e-12
270	270	330	10	-30	-30	0	0	1.85e-06		0			-60
270	270	30	10	-30	-30	0	0	1.85e-06		0			-60
270	270	90	10	60	59.9999	0.0001	1e-08	1.85e-06		0.0001			120
270	270	180	10	30	30	0	0	1.84e-06		0			60
330	270	330	10	0	-1.6923e-09	1.6923e-09	2.86388e-18	1.84e-06		1.6923e-09			-1.6923e-09
330	270	30	10	0	-4.0666e-09	4.0666e-09	1.65372e-17	1.84e-06		4.0666e-09			-4.0666e-09
330	270	90	10	0	8.4427e-09	-8.4427e-09	7.12792e-17	1.84e-06		8.4427e-09			8.4427e-09
330	270	180	10	-30	-30	0	0	1.84e-06		0			-60
30	270	330	10	0	9.749e-07	-9.749e-07	9.5043e-13	1.84e-06		9.749e-07			9.749e-07
30	270	30	10	0	1.9415e-15	-1.9415e-15	3.76942e-30	1.84e-06		1.9415e-15			1.9415e-15
30	270	90	10	0	1.3087e-15	-1.3087e-15	1.7127e-30	1.84e-06		1.3087e-15			1.3087e-15
30	270	180	10	0	-7.7977e-12	7.7977e-12	6.08041e-23	1.84e-06		7.7977e-12			-7.7977e-12
180	270	330	10	0	-1.0025e-08	1.0025e-08	1.00501e-16	1.84e-06		1.0025e-08			-1.0025e-08
180	270	30	10	0	8.8036e-08	-8.8036e-08	7.75034e-15	1.84e-06		8.8036e-08			8.8036e-08
180	270	90	10	0	1.0987e-08	-1.0987e-08	1.20714e-16	1.84e-06		1.0987e-08			1.0987e-08
180	270	180	10	0	9.5814e-09	-9.5814e-09	9.18032e-17	1.84e-06		9.5814e-09			9.5814e-09
90	30	330	15	60	59.9999	0.0001	1e-08	1.84e-06		0.0001			120
270	330	30	15	60	59.9999	0.0001	1e-08	1.83e-06		0.0001			120
330	90	90	15	-60	-59.9999	-0.0001	1e-08	1.82e-06		0.0001			-120
30	180	180	15	0	-2.5696e-10	2.5696e-10	6.60284e-20	1.81e-06		2.5696e-10			-2.5696e-10
180	270	270	15	0	-4.0889e-12	4.0889e-12	1.67191e-23	1.81e-06		4.0889e-12			-4.0889e-12
90	330	30	15	0	-1.8658e-13	1.8658e-13	3.48121e-26	1.81e-06		1.8658e-13			-1.8658e-13
90	90	90	15	0	7.2709e-08	-7.2709e-08	5.2866e-15	1.81e-06		7.2709e-08			7.2709e-08
90	180	180	15	0	6.9686e-11	-6.9686e-11	4.85614e-21	1.81e-06		6.9686e-11			6.9686e-11
90	270	270	15	0	-6.167e-12	6.167e-12	3.80319e-23	1.81e-06		6.167e-12			-6.167e-12
270	30	330	15	0	3.4589e-09	-3.4589e-09	1.1964e-17	1.81e-06		3.4589e-09			3.4589e-09
270	90	90	15	0	-7.3422e-09	7.3422e-09	5.39079e-17	1.81e-06		7.3422e-09			-7.3422e-09
270	180	180	15	0	1.4667e-08	-1.4667e-08	2.15121e-16	1.81e-06		1.4667e-08			1.4667e-08
270	270	270	15	0	7.5157e-08	-7.5157e-08	5.64857e-15	1.81e-06		7.5157e-08			7.5157e-08
330	30	330	15	0	-1.745e-12	1.745e-12	3.04503e-24	1.81e-06		1.745e-12			-1.745e-12
330	330	30	15	0	7.4563e-09	-7.4563e-09	5.55964e-17	1.81e-06		7.4563e-09			7.4563e-09
330	180	180	15	0	-3.7761e-11	3.7761e-11	1.42589e-21	1.81e-06		3.7761e-11			-3.7761e-11
330	270	270	15	0	2.1284e-09	-2.1284e-09	4.53009e-18	1.81e-06		2.1284e-09			2.1284e-09
30	30	330	15	0	5.0936e-09	-5.0936e-09	2.59448e-17	1.81e-06		5.0936e-09			5.0936e-09
30	330	30	15	0	2.3906e-17	-2.3906e-17	5.71497e-34	1.81e-06		2.3906e-17			2.3906e-17
30	90	90	15	0	-2.1979e-11	2.1979e-11	4.83076e-22	1.81e-06		2.1979e-11			-2.1979e-11
30	270	270	15	0	3.7633e-08	-3.7633e-08	1.41624e-15	1.81e-06		3.7633e-08			3.7633e-08
180	30	330	15	0	2.6276e-09	-2.6276e-09	6.90428e-18	1.81e-06		2.6276e-09			2.6276e-09
180	330	30	15	0	4.7483e-09	-4.7483e-09	2.25464e-17	1.81e-06		4.7483e-09			4.7483e-09
180	90	90	15	0	2.7695e-08	-2.7695e-08	7.67013e-16	1.81e-06		2.7695e-08			2.7695e-08
180	180	180	15	0	4.5093e-08	-4.5093e-08	2.03338e-15	1.81e-06		4.5093e-08			4.5093e-08
90	330	330	15	0	2.6381e-09	-2.6381e-09	6.95957e-18	1.81e-06		2.6381e-09			2.6381e-09
90	330	90	15	0	1.216e-16	-1.216e-16	1.47866e-32	1.81e-06		1.216e-16			1.216e-16
90	330	180	15	0	-5.8013e-13	5.8013e-13	3.36551e-25	1.81e-06		5.8013e-13			-5.8013e-13
90	330	270	15	0	1.4472e-08	-1.4472e-08	2.09439e-16	1.81e-06		1.4472e-08			1.4472e-08
270	330	330	15	0	2.5949e-09	-2.5949e-09	6.73351e-18	1.81e-06		2.5949e-09			2.5949e-09
270	330	90	15	0	3.1967e-08	-3.1967e-08	1.02189e-15	1.81e-06		3.1967e-08			3.1967e-08
270	330	180	15	0	4.2762e-09	-4.2762e-09	1.82859e-17	1.81e-06		4.2762e-09			4.2762e-09
270	330	270	15	0	3.657e-09	-3.657e-09	1.33736e-17	1.81e-06		3.657e-09			3.657e-09
330	330	330	15	0	7.5839e-08	-7.5839e-08	5.75155e-15	1.81e-06		7.5839e-08			7.5839e-08
330	330	90	15	0	7.2695e-08	-7.2695e-08	5.28456e-15	1.81e-06		7.2695e-08			7.2695e-08
330	330	180	15	0	8.8376e-08	-8.8376e-08	7.81032e-15	1.81e-06		8.8376e-08			8.8376e-08
330	330	270	15	30	30	0	0	1.81e-06		0			60
30	330	330	15	0	2.5755e-08	-2.5755e-08	6.6332e-16	1.81e-06		2.5755e-08			2.5755e-08
30	330	90	15	0	4.2e-17	-4.2e-17	1.764e-33	1.81e-06		4.2e-17			4.2e-17
30	330	180	15	0	-7.8816e-13	7.8816e-13	6.21196e-25	1.81e-06		7.8816e-13			-7.8816e-13
30	330	270	15	0	1.9688e-08	-1.9688e-08	3.87617e-16	1.81e-06		1.9688e-08			1.9688e-08
180	330	330	15	60	59.9999	0.0001	1e-08	1.81e-06		0.0001			120
180	330	90	15	0	-2.3493e-12	2.3493e-12	5.51921e-24	1.8e-06		2.3493e-12			-2.3493e-12
180	330	180	15	0	-4.0448e-13	4.0448e-13	1.63604e-25	1.8e-06		4.0448e-13			-4.0448e-13
180	330	270	15	0	6.2872e-09	-6.2872e-09	3.95289e-17	1.8e-06		6.2872e-09			6.2872e-09
90	30	30	15	0	-1.4208e-11	1.4208e-11	2.01867e-22	1.8e-06		1.4208e-11			-1.4208e-11
90	30	90	15	0	5.8329e-12	-5.8329e-12	3.40227e-23	1.8e-06		5.8329e-12			5.8329e-12
90	30	180	15	0	1.6772e-11	-1.6772e-11	2.813e-22	1.8e-06		1.6772e-11			1.6772e-11
90	30	270	15	0	-1.2389e-08	1.2389e-08	1.53487e-16	1.8e-06		1.2389e-08			-1.2389e-08
270	30	30	15	0	4.2075e-12	-4.2075e-12	1.77031e-23	1.8e-06		4.2075e-12			4.2075e-12
270	30	90	15	0	-1.4479e-08	1.4479e-08	2.09641e-16	1.8e-06		1.4479e-08			-1.4479e-08
270	30	180	15	0	4.4053e-08	-4.4053e-08	1.94067e-15	1.8e-06		4.4053e-08			4.4053e-08
270	30	270	15	0	-2.1268e-12	2.1268e-12	4.52328e-24	1.8e-06		2.1268e-12			-2.1268e-12
330	30	30	15	0	-1.3009e-11	1.3009e-11	1.69234e-22	1.8e-06		1.3009e-11			-1.3009e-11
330	30	90	15	0	4.7356e-08	-4.7356e-08	2.24259e-15	1.8e-06		4.7356e-08			4.7356e-08
330	30	180	15	360	360	0.0004	1.6e-07	1.8e-06		0.0004			720
330	30	270	15	0	1.4497e-08	-1.4497e-08	2.10163e-16	1.64e-06		1.4497e-08			1.4497e-08
30	30	30	15	0	7.2897e-08	-7.2897e-08	5.31397e-15	1.64e-06		7.2897e-08			7.2897e-08
30	30	90	15	0	-7.272e-08	7.272e-08	5.2882e-15	1.64e-06		7.272e-08			-7.272e-08
30	30	180	15	0	-8.8404e-08	8.8404e-08	7.81527e-15	1.64e-06		8.8404e-08			-8.8404e-08
30	30	270	15	-30	-30	0	0	1.64e-06		0			-60
180	30	30	15	0	-8.7047e-12	8.7047e-12	7.57718e-23	1.64e-06		8.7047e-12			-8.7047e-12
180	30	90	15	0	-5.2141e-13	5.2141e-13	2.71868e-25	1.64e-06		5.2141e-13			-5.2141e-13
180	30	180	15	0	-1.7311e-09	1.7311e-09	2.99671e-18	1.64e-06		1.7311e-09			-1.7311e-09
180	30	270	15	0	5.9794e-13	-5.9794e-13	3.57532e-25	1.64e-06		5.9794e-13			5.9794e-13
90	90	330	15	0	7.614e-08	-7.614e-08	5.7973e-15	1.64e-06		7.614e-08			7.614e-08
90	90	30	15	0	7.2863e-08	-7.2863e-08	5.30902e-15	1.64e-06		7.2863e-08			7.2863e-08
90	90	180	15	0	-7.4116e-08	7.4116e-08	5.49318e-15	1.64e-06		7.4116e-08			-7.4116e-08
90	90	270	15	0	2.2417e-07	-2.2417e-07	5.02522e-14	1.64e-06		2.2417e-07			2.2417e-07
270	90	330	15	60	59.9999	0.0001	1e-08	1.64e-06		0.0001			120
270	90	30	15	0	-4.0891e-12	4.0891e-12	1.67207e-23	1.63e-06		4.0891e-12			-4.0891e-12
270	90	180	15	0	-1.316e-09	1.316e-09	1.73186e-18	1.63e-06		1.316e-09			-1.316e-09
270	90	270	15	0	6.288e-09	-6.288e-09	3.95389e-17	1.63e-06		6.288e-09			6.288e-09
330	90	330	15	0	7.3419e-09	-7.3419e-09	5.39035e-17	1.63e-06		7.3419e-09			7.3419e-09
330	90	30	15	0	-1.7516e-08	1.7516e-08	3.0681e-16	1.63e-06		1.7516e-08			-1.7516e-08
330	90	180	15	0	1.6989e-08	-1.6989e-08	2.88626e-16	1.63e-06		1.6989e-08			1.6989e-08
330	90	270	15	0	-1.4689e-12	1.4689e-12	2.15767e-24	1.63e-06		1.4689e-12			-1.4689e-12
30	90	330	15	0	3.7624e-08	-3.7624e-08	1.41557e-15	1.63e-06		3.7624e-08			3.7624e-08
30	90	30	15	0	-1.4198e-11	1.4198e-11	2.01583e-22	1.63e-06		1.4198e-11			-1.4198e-11
30	90	180	15	0	2.6088e-07	-2.6088e-07	6.80584e-14	1.63e-06		2.6088e-07			2.6088e-07
30	90	270	15	360	360	0.0004	1.6e-07	1.63e-06		0.0004			720
180	90	330	15	0	2.6817e-09	-2.6817e-09	7.19151e-18	1.47e-06		2.6817e-09			2.6817e-09
180	90	30	15	0	1.4393e-07	-1.4393e-07	2.07158e-14	1.47e-06		1.4393e-07			1.4393e-07
180	90	180	15	-30	-30	0	0	1.47e-06		0			-60
180	90	270	15	0	-1.1468e-09	1.1468e-09	1.31515e-18	1.47e-06		1.1468e-09			-1.1468e-09
90	180	330	15	0	-8.2404e-11	8.2404e-11	6.79042e-21	1.47e-06		8.2404e-11			-8.2404e-11
90	180	30	15	0	-1.4016e-09	1.4016e-09	1.96448e-18	1.47e-06		1.4016e-09			-1.4016e-09
90	180	90	15	0	1.25e-09	-1.25e-09	1.5625e-18	1.47e-06		1.25e-09			1.25e-09
90	180	270	15	0	-2.1766e-10	2.1766e-10	4.73759e-20	1.47e-06		2.1766e-10			-2.1766e-10
270	180	330	15	0	5.9405e-08	-5.9405e-08	3.52895e-15	1.47e-06		5.9405e-08			5.9405e-08
270	180	30	15	0	-1.2907e-09	1.2907e-09	1.66591e-18	1.47e-06		1.2907e-09			-1.2907e-09
270	180	90	15	0	1.2636e-09	-1.2636e-09	1.59668e-18	1.47e-06		1.2636e-09			1.2636e-09
270	180	270	15	0	-2.1362e-11	2.1362e-11	4.56335e-22	1.47e-06		2.1362e-11			-2.1362e-11
330	180	330	15	0	-7.2356e-12	7.2356e-12	5.23539e-23	1.47e-06		7.2356e-12			-7.2356e-12
330	180	30	15	0	1.7397e-11	-1.7397e-11	3.02656e-22	1.47e-06		1.7397e-11			1.7397e-11
330	180	90	15	0	-5.9377e-08	5.9377e-08	3.52563e-15	1.47e-06		5.9377e-08			-5.9377e-08
330	180	270	15	0	-3.4313e-13	3.4313e-13	1.17738e-25	1.47e-06		3.4313e-13			-3.4313e-13
30	180	330	15	0	8.8026e-08	-8.8026e-08	7.74858e-15	1.47e-06		8.8026e-08			8.8026e-08
30	180	30	15	0	1.8409e-13	-1.8409e-13	3.38891e-26	1.47e-06		1.8409e-13			1.8409e-13
30	180	90	15	0	-1.4744e-13	1.4744e-13	2.17386e-26	1.47e-06		1.4744e-13			-1.4744e-13
30	180	270	15	0	3.5628e-07	-3.5628e-07	1.26935e-13	1.47e-06		3.5628e-07			3.5628e-07
180	180	330	15	0	-8.7425e-08	8.7425e-08	7.64313e-15	1.47e-06		8.7425e-08			-8.7425e-08
180	180	30	15	-30	-30	0	0	1.47e-06		0			-60
180	180	90	15	30	30	0	0	1.47e-06		0			60
180	180	270	15	0	-7.2888e-08	7.2888e-08	5.31266e-15	1.47e-06		7.2888e-08			-7.2888e-08
90	270	330	15	0	4.9741e-08	-4.9741e-08	2.47417e-15	1.47e-06		4.9741e-08			4.9741e-08
90	270	30	15	0	1.3225e-09	-1.3225e-09	1.74901e-18	1.47e-06		1.3225e-09			1.3225e-09
90	270	90	15	0	-6.876e-13	6.876e-13	4.72794e-25	1.47e-06		6.876e-13			-6.876e-13
90	270	180	15	0	-1.0894e-13	1.0894e-13	1.18679e-26	1.47e-06		1.0894e-13			-1.0894e-13
270	270	330	15	0	-7.2768e-08	7.2768e-08	5.29518e-15	1.47e-06		7.2768e-08			-7.2768e-08
270	270	30	15	0	-6.7084e-08	6.7084e-08	4.50026e-15	1.47e-06		6.7084e-08			-6.7084e-08
270	270	90	15	0	1.7817e-07	-1.7817e-07	3.17445e-14	1.47e-06		1.7817e-07			1.7817e-07
270	270	180	15	60	59.9999	0.0001	1e-08	1.47e-06		0.0001			120
330	270	330	15	0	3.4583e-12	-3.4583e-12	1.19598e-23	1.46e-06		3.4583e-12			3.4583e-12
330	270	30	15	0	8.1721e-12	-8.1721e-12	6.67832e-23	1.46e-06		8.1721e-12			8.1721e-12
330	270	90	15	0	-1.8758e-11	1.8758e-11	3.51863e-22	1.46e-06		1.8758e-11			-1.8758e-11
330	270	180	15	0	1.0826e-07	-1.0826e-07	1.17202e-14	1.46e-06		1.0826e-07			1.0826e-07
30	270	330	15	360	360	0.0004	1.6e-07	1.46e-06		0.0004			720
30	270	30	15	0	-1.7024e-13	1.7024e-13	2.89817e-26	1.3e-06		1.7024e-13			-1.7024e-13
30	270	90	15	0	1.5571e-16	-1.5571e-16	2.42456e-32	1.3e-06		1.5571e-16			1.5571e-16
30	270	180	15	0	-1.2613e-12	1.2613e-12	1.59088e-24	1.3e-06		1.2613e-12			-1.2613e-12
180	270	330	15	0	1.7796e-07	-1.7796e-07	3.16698e-14	1.3e-06		1.7796e-07			1.7796e-07
180	270	30	15	30	30	0	0	1.3e-06		0			60
180	270	90	15	0	1.608e-08	-1.608e-08	2.58566e-16	1.3e-06		1.608e-08			1.608e-08
180	270	180	15	0	2.5845e-09	-2.5845e-09	6.67964e-18	1.3e-06		2.5845e-09			2.5845e-09
90	30	330	25	360	360	0.0004	1.6e-07	1.3e-06		0.0004			720
270	330	30	25	360	360	0.0004	1.6e-07	1.14e-06		0.0004			720
330	90	90	25	0	-8.2614e-09	8.2614e-09	6.82507e-17	9.8e-07		8.2614e-09			-8.2614e-09
30	180	180	25	0	3.5499e-07	-3.5499e-07	1.26018e-13	9.8e-07		3.5499e-07			3.5499e-07
180	270	270	25	0	3.7598e-08	-3.7598e-08	1.41361e-15	9.8e-07		3.7598e-08			3.7598e-08
90	330	30	25	0	-5.5246e-13	5.5246e-13	3.05212e-25	9.8e-07		5.5246e-13			-5.5246e-13
90	90	90	25	0	-3.9614e-11	3.9614e-11	1.56927e-21	9.8e-07		3.9614e-11			-3.9614e-11
90	180	180	25	0	-5.1258e-11	5.1258e-11	2.62738e-21	9.8e-07		5.1258e-11			-5.1258e-11
90	270	270	25	0	2.1203e-09	-2.1203e-09	4.49567e-18	9.8e-07		2.1203e-09			2.1203e-09
270	30	330	25	0	-2.2134e-12	2.2134e-12	4.89914e-24	9.8e-07		2.2134e-12			-2.2134e-12
270	90	90	25	0	-1.7418e-09	1.7418e-09	3.03387e-18	9.8e-07		1.7418e-09			-1.7418e-09
270	180	180	25	0	-1.8646e-11	1.8646e-11	3.47673e-22	9.8e-07		1.8646e-11			-1.8646e-11
270	270	270	25	0	-3.6488e-11	3.6488e-11	1.33137e-21	9.8e-07		3.6488e-11			-3.6488e-11
330	30	330	25	0	9.6863e-16	-9.6863e-16	9.38244e-31	9.8e-07		9.6863e-16			9.6863e-16
330	330	30	25	0	4.3902e-08	-4.3902e-08	1.92739e-15	9.8e-07		4.3902e-08			4.3902e-08
330	180	180	25	0	8.7776e-08	-8.7776e-08	7.70463e-15	9.8e-07		8.7776e-08			8.7776e-08
330	270	270	25	0	1.4449e-08	-1.4449e-08	2.08774e-16	9.8e-07		1.4449e-08			1.4449e-08
30	30	330	25	0	4.9578e-08	-4.9578e-08	2.45798e-15	9.8e-07		4.9578e-08			4.9578e-08
30	330	30	25	0	2.6472e-16	-2.6472e-16	7.00767e-32	9.8e-07		2.6472e-16			2.6472e-16
30	90	90	25	0	2.2504e-08	-2.2504e-08	5.0643e-16	9.8e-07		2.2504e-08			2.2504e-08
30	270	270	25	0	2.5652e-08	-2.5652e-08	6.58025e-16	9.8e-07		2.5652e-08			2.5652e-08
180	30	330	25	0	1.58e-08	-1.58e-08	2.4964e-16	9.8e-07		1.58e-08			1.58e-08
180	330	30	25	0	1.5542e-08	-1.5542e-08	2.41554e-16	9.8e-07		1.5542e-08			1.5542e-08
180	90	90	25	0	1.0472e-07	-1.0472e-07	1.09663e-14	9.8e-07		1.0472e-07			1.0472e-07
180	180	180	25	0	-1.8894e-11	1.8894e-11	3.56983e-22	9.8e-07		1.8894e-11			-1.8894e-11
90	330	330	25	0	3.1256e-09	-3.1256e-09	9.76938e-18	9.8e-07		3.1256e-09			3.1256e-09
90	330	90	25	0	-1.0985e-13	1.0985e-13	1.2067e-26	9.8e-07		1.0985e-13			-1.0985e-13
90	330	180	25	0	1.2023e-09	-1.2023e-09	1.44553e-18	9.8e-07		1.2023e-09			1.2023e-09
90	330	270	25	30	30	0	0	9.8e-07		0			60
270	330	330	25	0	-2.3527e-12	2.3527e-12	5.5352e-24	9.8e-07		2.3527e-12			-2.3527e-12
270	330	90	25	30	30	0	0	9.8e-07		0			60
270	330	180	25	0	5.5223e-09	-5.5223e-09	3.04958e-17	9.8e-07		5.5223e-09			5.5223e-09
270	330	270	25	0	-2.0128e-12	2.0128e-12	4.05136e-24	9.8e-07		2.0128e-12			-2.0128e-12
330	330	330	25	0	-3.3411e-11	3.3411e-11	1.11629e-21	9.8e-07		3.3411e-11			-3.3411e-11
330	330	90	25	0	5.4868e-09	-5.4868e-09	3.0105e-17	9.8e-07		5.4868e-09			5.4868e-09
330	330	180	25	30	30	0	0	9.8e-07		0			60
330	330	270	25	0	1.5641e-08	-1.5641e-08	2.44641e-16	9.8e-07		1.5641e-08			1.5641e-08
30	330	330	25	0	3.7575e-08	-3.7575e-08	1.41188e-15	9.8e-07		3.7575e-08			3.7575e-08
30	330	90	25	0	-7.6874e-13	7.6874e-13	5.90961e-25	9.8e-07		7.6874e-13			-7.6874e-13
30	330	180	25	0	1.4448e-08	-1.4448e-08	2.08745e-16	9.8e-07		1.4448e-08			1.4448e-08
30	330	270	25	360	360	0.0004	1.6e-07	9.8e-07		0.0004			720
180	330	330	25	0	5.4615e-08	-5.4615e-08	2.9828e-15	8.2e-07		5.4615e-08			5.4615e-08
180	330	90	25	0	1.2906e-09	-1.2906e-09	1.66565e-18	8.2e-07		1.2906e-09			1.2906e-09
180	330	180	25	0	-2.7683e-13	2.7683e-13	7.66348e-26	8.2e-07		2.7683e-13			-2.7683e-13
180	330	270	25	0	1.3092e-09	-1.3092e-09	1.714e-18	8.2e-07		1.3092e-09			1.3092e-09
90	30	30	25	0	-9.0106e-13	9.0106e-13	8.11909e-25	8.2e-07		9.0106e-13			-9.0106e-13
90	30	90	25	0	3.6608e-13	-3.6608e-13	1.34015e-25	8.2e-07		3.6608e-13			3.6608e-13
90	30	180	25	0	-5.3402e-09	5.3402e-09	2.85177e-17	8.2e-07		5.3402e-09			-5.3402e-09
90	30	270	25	-30	-30	0	0	8.2e-07		0			-60
270	30	30	25	0	-8.7448e-09	8.7448e-09	7.64715e-17	8.2e-07		8.7448e-09			-8.7448e-09
270	30	90	25	-30	-30	0	0	8.2e-07		0			-60
270	30	180	25	0	-1.8991e-09	1.8991e-09	3.60658e-18	8.2e-07		1.8991e-09			-1.8991e-09
270	30	270	25	0	1.113e-13	-1.113e-13	1.23877e-26	8.2e-07		1.113e-13			1.113e-13
330	30	30	25	0	1.047e-07	-1.047e-07	1.09621e-14	8.2e-07		1.047e-07			1.047e-07
330	30	90	25	360	360	0.0004	1.6e-07	8.2e-07		0.0004			720
330	30	180	25	0	1.9613e-07	-1.9613e-07	3.8467e-14	6.6e-07		1.9613e-07			1.9613e-07
330	30	270	25	0	-7.7306e-12	7.7306e-12	5.97622e-23	6.6e-07		7.7306e-12			-7.7306e-12
30	30	30	25	0	-3.1289e-11	3.1289e-11	9.79002e-22	6.6e-07		3.1289e-11			-3.1289e-11
30	30	90	25	0	-1.8447e-09	1.8447e-09	3.40292e-18	6.6e-07		1.8447e-09			-1.8447e-09
30	30	180	25	-30	-30	0	0	6.6e-07		0			-60
30	30	270	25	0	-1.9859e-08	1.9859e-08	3.9438e-16	6.6e-07		1.9859e-08			-1.9859e-08
180	30	30	25	0	2.0691e-08	-2.0691e-08	4.28117e-16	6.6e-07		2.0691e-08			2.0691e-08
180	30	90	25	0	-1.3031e-09	1.3031e-09	1.69807e-18	6.6e-07		1.3031e-09			-1.3031e-09
180	30	180	25	0	1.135e-12	-1.135e-12	1.28822e-24	6.6e-07		1.135e-12			1.135e-12
180	30	270	25	0	-1.3188e-09	1.3188e-09	1.73923e-18	6.6e-07		1.3188e-09			-1.3188e-09
90	90	330	25	0	2.6918e-08	-2.6918e-08	7.24579e-16	6.6e-07		2.6918e-08			2.6918e-08
90	90	30	25	0	1.578e-08	-1.578e-08	2.49008e-16	6.6e-07		1.578e-08			1.578e-08
90	90	180	25	0	5.202e-08	-5.202e-08	2.70608e-15	6.6e-07		5.202e-08			5.202e-08
90	90	270	25	60	59.9999	0.0001	1e-08	6.6e-07		0.0001			120
270	90	330	25	0	2.8947e-08	-2.8947e-08	8.37929e-16	6.5e-07		2.8947e-08			2.8947e-08
270	90	30	25	0	1.5549e-08	-1.5549e-08	2.41771e-16	6.5e-07		1.5549e-08			1.5549e-08
270	90	180	25	0	7.5163e-13	-7.5163e-13	5.64948e-25	6.5e-07		7.5163e-13			7.5163e-13
270	90	270	25	0	-3.1111e-12	3.1111e-12	9.67894e-24	6.5e-07		3.1111e-12			-3.1111e-12
330	90	330	25	0	-3.5252e-12	3.5252e-12	1.2427e-23	6.5e-07		3.5252e-12			-3.5252e-12
330	90	30	25	0	6.7259e-13	-6.7259e-13	4.52377e-25	6.5e-07		6.7259e-13			6.7259e-13
330	90	180	25	0	-9.5674e-11	9.5674e-11	9.15351e-21	6.5e-07		9.5674e-11			-9.5674e-11
330	90	270	25	0	4.2163e-15	-4.2163e-15	1.77772e-29	6.5e-07		4.2163e-15			4.2163e-15
30	90	330	25	0	-2.3091e-11	2.3091e-11	5.33194e-22	6.5e-07		2.3091e-11			-2.3091e-11
30	90	30	25	0	-7.8384e-12	7.8384e-12	6.14405e-23	6.5e-07		7.8384e-12			-7.8384e-12
30	90	180	25	360	360	0.0004	1.6e-07	6.5e-07		0.0004			720
30	90	270	25	0	1.964e-07	-1.964e-07	3.8573e-14	4.9e-07		1.964e-07			1.964e-07
180	90	330	25	0	-2.9676e-08	2.9676e-08	8.80665e-16	4.9e-07		2.9676e-08			-2.9676e-08
180	90	30	25	360	360	0.0004	1.6e-07	4.9e-07		0.0004			720
180	90	180	25	0	-1.4478e-08	1.4478e-08	2.09612e-16	3.3e-07		1.4478e-08			-1.4478e-08
180	90	270	25	0	2.6378e-09	-2.6378e-09	6.95799e-18	3.3e-07		2.6378e-09			2.6378e-09
90	180	330	25	0	-1.3451e-09	1.3451e-09	1.80929e-18	3.3e-07		1.3451e-09			-1.3451e-09
90	180	30	25	0	1.3059e-09	-1.3059e-09	1.70537e-18	3.3e-07		1.3059e-09			1.3059e-09
90	180	90	25	0	-9.7947e-13	9.7947e-13	9.59361e-25	3.3e-07		9.7947e-13			-9.7947e-13
90	180	270	25	0	5.9201e-08	-5.9201e-08	3.50476e-15	3.3e-07		5.9201e-08			5.9201e-08
270	180	330	25	0	-1.3304e-09	1.3304e-09	1.76996e-18	3.3e-07		1.3304e-09			-1.3304e-09
270	180	30	25	0	1.2755e-09	-1.2755e-09	1.6269e-18	3.3e-07		1.2755e-09			1.2755e-09
270	180	90	25	0	1.4636e-08	-1.4636e-08	2.14212e-16	3.3e-07		1.4636e-08			1.4636e-08
270	180	270	25	0	1.4597e-13	-1.4597e-13	2.13072e-26	3.3e-07		1.4597e-13			1.4597e-13
330	180	330	25	0	1.4846e-13	-1.4846e-13	2.20404e-26	3.3e-07		1.4846e-13			1.4846e-13
330	180	30	25	0	-1.4416e-13	1.4416e-13	2.07821e-26	3.3e-07		1.4416e-13			-1.4416e-13
330	180	90	25	0	6.1901e-12	-6.1901e-12	3.83173e-23	3.3e-07		6.1901e-12			6.1901e-12
330	180	270	25	0	-3.5191e-12	3.5191e-12	1.23841e-23	3.3e-07		3.5191e-12			-3.5191e-12
30	180	330	25	0	-4.2099e-11	4.2099e-11	1.77233e-21	3.3e-07		4.2099e-11			-4.2099e-11
30	180	30	25	0	-1.6236e-13	1.6236e-13	2.63608e-26	3.3e-07		1.6236e-13			-1.6236e-13
30	180	90	25	0	-2.2162e-11	2.2162e-11	4.91154e-22	3.3e-07		2.2162e-11			-2.2162e-11
30	180	270	25	0	-1.9758e-10	1.9758e-10	3.90379e-20	3.3e-07		1.9758e-10			-1.9758e-10
180	180	330	25	-30	-30	0	0	3.3e-07		0			-60
180	180	30	25	30	30	0	0	3.3e-07		0			60
180	180	90	25	0	2.3119e-08	-2.3119e-08	5.34488e-16	3.3e-07		2.3119e-08			2.3119e-08
180	180	270	25	0	-3.1199e-09	3.1199e-09	9.73378e-18	3.3e-07		3.1199e-09			-3.1199e-09
90	270	330	25	0	1.5781e-08	-1.5781e-08	2.4904e-16	3.3e-07		1.5781e-08			1.5781e-08
90	270	30	25	0	-9.5205e-13	9.5205e-13	9.06399e-25	3.3e-07		9.5205e-13			-9.5205e-13
90	270	90	25	0	-9.1653e-14	9.1653e-14	8.40027e-27	3.3e-07		9.1653e-14			-9.1653e-14
90	270	180	25	0	-7.3037e-14	7.3037e-14	5.3344e-27	3.3e-07		7.3037e-14			-7.3037e-14
270	270	330	25	0	1.5574e-08	-1.5574e-08	2.42549e-16	3.3e-07		1.5574e-08			1.5574e-08
270	270	30	25	0	4.3168e-08	-4.3168e-08	1.86348e-15	3.3e-07		4.3168e-08			4.3168e-08
270	270	90	25	60	59.9999	0.0001	1e-08	3.3e-07		0.0001			120
270	270	180	25	0	7.6578e-08	-7.6578e-08	5.86419e-15	3.2e-07		7.6578e-08			7.6578e-08
330	270	330	25	0	-3.0478e-12	3.0478e-12	9.28908e-24	3.2e-07		3.0478e-12			-3.0478e-12
330	270	30	25	0	-1.1067e-11	1.1067e-11	1.22478e-22	3.2e-07		1.1067e-11			-1.1067e-11
330	270	90	25	0	2.982e-08	-2.982e-08	8.89232e-16	3.2e-07		2.982e-08			2.982e-08
330	270	180	25	360	360	0.0004	1.6e-07	3.2e-07		0.0004			720
30	270	330	25	0	1.736e-07	-1.736e-07	3.0137e-14	1.6e-07		1.736e-07			1.736e-07
30	270	30	25	0	1.2115e-16	-1.2115e-16	1.46773e-32	1.6e-07		1.2115e-16			1.2115e-16
30	270	90	25	0	5.4495e-15	-5.4495e-15	2.96971e-29	1.6e-07		5.4495e-15			5.4495e-15
30	270	180	25	0	-8.7258e-11	8.7258e-11	7.61396e-21	1.6e-07		8.7258e-11			-8.7258e-11
180	270	330	25	360	360	0.0004	1.6e-07	1.6e-07		0.0004			720
180	270	30	25	0	2.1713e-08	-2.1713e-08	4.71454e-16	4.78114e-16		2.1713e-08			2.1713e-08
180	270	90	25	0	2.5806e-09	-2.5806e-09	6.6595e-18	6.65952e-18		2.5806e-09			2.5806e-09
180	270	180	25	0	-4.4496e-12	4.4496e-12	1.97989e-23	1.97989e-23		4.4496e-12			-4.4496e-12
