# Supplementary material for: The Neural-Fuzzy Approach as a Way of Preventing a Maritime Vessel Accident in a Heavy Traffic Zone
Source: Hindawi journal article supplement (doi:10.1155/2018/2367096), 2018-08-15
Supplement: f6 [file 2367096.f6.xlsx]

## Sheet: Лист1
1 input LV	2 input LV	3 input LV	4 input LV	Known value LV output	out	(output-out)	G1^2	sum	RMSE	|output-out|	sum	MAE	output+out	sum	SMAPE
90	330	0	0	0	0	0	0	1.93039e-06	6.06376e-05	0	0.00614536	1.17054e-05	0	9779.99	6.2836e-07
270	330	0	0	0	0	0	0	1.93039e-06		0			0
330	330	0	0	30	30	0	0	1.93039e-06		0			60
30	330	0	0	0	0	0	0	1.93039e-06		0			0
180	330	0	0	0	0	0	0	1.93039e-06		0			0
90	30	0	0	0	0	0	0	1.93039e-06		0			0
270	30	0	0	0	0	0	0	1.93039e-06		0			0
330	30	0	0	0	0	0	0	1.93039e-06		0			0
30	30	0	0	30	30	0	0	1.93039e-06		0			60
180	30	0	0	0	0	0	0	1.93039e-06		0			0
90	90	0	0	30	30	0	0	1.93039e-06		0			60
270	90	0	0	0	0	0	0	1.93039e-06		0			0
330	90	0	0	0	0	0	0	1.93039e-06		0			0
30	90	0	0	0	0	0	0	1.93039e-06		0			0
180	90	0	0	0	0	0	0	1.93039e-06		0			0
90	180	0	0	0	0	0	0	1.93039e-06		0			0
270	180	0	0	0	0	0	0	1.93039e-06		0			0
330	180	0	0	0	0	0	0	1.93039e-06		0			0
30	180	0	0	0	0	0	0	1.93039e-06		0			0
180	180	0	0	30	30	0	0	1.93039e-06		0			60
90	270	0	0	0	0	0	0	1.93039e-06		0			0
270	270	0	0	30	30	0	0	1.93039e-06		0			60
330	270	0	0	0	0	0	0	1.93039e-06		0			0
30	270	0	0	0	0	0	0	1.93039e-06		0			0
180	270	0	0	0	0	0	0	1.93039e-06		0			0
90	30	330	5	-30	-30	0	0	1.93039e-06		0			-60
270	330	30	5	0	-1.4313e-07	1.4313e-07	2.04862e-14	1.93039e-06		1.4313e-07			-1.4313e-07
330	90	90	5	0	0	0	0	1.93039e-06		0			0
30	180	180	5	0	0	0	0	1.93039e-06		0			0
180	270	270	5	0	0	0	0	1.93039e-06		0			0
90	330	30	5	0	0	0	0	1.93039e-06		0			0
90	90	90	5	30	30	0	0	1.93039e-06		0			60
90	180	180	5	0	0	0	0	1.93039e-06		0			0
90	270	270	5	0	0	0	0	1.93039e-06		0			0
270	30	330	5	0	0	0	0	1.93039e-06		0			0
270	90	90	5	0	0	0	0	1.93039e-06		0			0
270	180	180	5	0	0	0	0	1.93039e-06		0			0
270	270	270	5	30	30	0	0	1.93039e-06		0			60
330	30	330	5	0	0	0	0	1.93039e-06		0			0
330	330	30	5	0	1.1e-06	-1.1e-06	1.21e-12	1.93039e-06		1.1e-06			1.1e-06
330	180	180	5	0	0	0	0	1.93038e-06		0			0
330	270	270	5	0	0	0	0	1.93038e-06		0			0
30	30	330	5	0	0	0	0	1.93038e-06		0			0
30	330	30	5	0	0	0	0	1.93038e-06		0			0
30	90	90	5	0	0	0	0	1.93038e-06		0			0
30	270	270	5	0	0	0	0	1.93038e-06		0			0
180	30	330	5	0	0	0	0	1.93038e-06		0			0
180	330	30	5	0	0	0	0	1.93038e-06		0			0
180	90	90	5	0	0	0	0	1.93038e-06		0			0
180	180	180	5	30	30	0	0	1.93038e-06		0			60
90	330	330	5	0	0	0	0	1.93038e-06		0			0
90	330	90	5	0	0	0	0	1.93038e-06		0			0
90	330	180	5	0	0	0	0	1.93038e-06		0			0
90	330	270	5	0	0	0	0	1.93038e-06		0			0
270	330	330	5	0	0	0	0	1.93038e-06		0			0
270	330	90	5	0	4.9056e-09	-4.9056e-09	2.40649e-17	1.93038e-06		4.9056e-09			4.9056e-09
270	330	180	5	0	0	0	0	1.93038e-06		0			0
270	330	270	5	0	0	0	0	1.93038e-06		0			0
330	330	330	5	30	30	0	0	1.93038e-06		0			60
330	330	90	5	30	30	0	0	1.93038e-06		0			60
330	330	180	5	30	30	0	0	1.93038e-06		0			60
330	330	270	5	30	30	0	0	1.93038e-06		0			60
30	330	330	5	0	0	0	0	1.93038e-06		0			0
30	330	90	5	0	0	0	0	1.93038e-06		0			0
30	330	180	5	0	0	0	0	1.93038e-06		0			0
30	330	270	5	-30	-30	0	0	1.93038e-06		0			-60
180	330	330	5	0	0	0	0	1.93038e-06		0			0
180	330	90	5	0	0	0	0	1.93038e-06		0			0
180	330	180	5	0	0	0	0	1.93038e-06		0			0
180	330	270	5	0	0	0	0	1.93038e-06		0			0
90	30	30	5	0	0	0	0	1.93038e-06		0			0
90	30	90	5	0	0	0	0	1.93038e-06		0			0
90	30	180	5	0	0	0	0	1.93038e-06		0			0
90	30	270	5	0	0	0	0	1.93038e-06		0			0
270	30	30	5	0	0	0	0	1.93038e-06		0			0
270	30	90	5	0	0	0	0	1.93038e-06		0			0
270	30	180	5	0	0	0	0	1.93038e-06		0			0
270	30	270	5	0	0	0	0	1.93038e-06		0			0
330	30	30	5	0	2.2001e-06	-2.2001e-06	4.84044e-12	1.93038e-06		2.2001e-06			2.2001e-06
330	30	90	5	-60	-59.9999	-0.0001	1e-08	1.93038e-06		0.0001			-120
330	30	180	5	0	0	0	0	1.92038e-06		0			0
330	30	270	5	0	0	0	0	1.92038e-06		0			0
30	30	30	5	30	30	0	0	1.92038e-06		0			60
30	30	90	5	-30	-30	0	0	1.92038e-06		0			-60
30	30	180	5	-30	-30	0	0	1.92038e-06		0			-60
30	30	270	5	30	30	0	0	1.92038e-06		0			60
180	30	30	5	0	0	0	0	1.92038e-06		0			0
180	30	90	5	0	0	0	0	1.92038e-06		0			0
180	30	180	5	0	0	0	0	1.92038e-06		0			0
180	30	270	5	0	0	0	0	1.92038e-06		0			0
90	90	330	5	30	30	0	0	1.92038e-06		0			60
90	90	30	5	30	30	0	0	1.92038e-06		0			60
90	90	180	5	-30	-30	0	0	1.92038e-06		0			-60
90	90	270	5	60	59.9999	0.0001	1e-08	1.92038e-06		0.0001			120
270	90	330	5	0	0	0	0	1.91038e-06		0			0
270	90	30	5	0	0	0	0	1.91038e-06		0			0
270	90	180	5	0	0	0	0	1.91038e-06		0			0
270	90	270	5	0	0	0	0	1.91038e-06		0			0
330	90	330	5	0	0	0	0	1.91038e-06		0			0
330	90	30	5	0	0	0	0	1.91038e-06		0			0
330	90	180	5	0	0	0	0	1.91038e-06		0			0
330	90	270	5	0	0	0	0	1.91038e-06		0			0
30	90	330	5	0	0	0	0	1.91038e-06		0			0
30	90	30	5	0	0	0	0	1.91038e-06		0			0
30	90	180	5	30	30	0	0	1.91038e-06		0			60
30	90	270	5	0	0	0	0	1.91038e-06		0			0
180	90	330	5	0	0	0	0	1.91038e-06		0			0
180	90	30	5	0	0	0	0	1.91038e-06		0			0
180	90	180	5	0	0	0	0	1.91038e-06		0			0
180	90	270	5	0	0	0	0	1.91038e-06		0			0
90	180	330	5	0	0	0	0	1.91038e-06		0			0
90	180	30	5	0	0	0	0	1.91038e-06		0			0
90	180	90	5	0	0	0	0	1.91038e-06		0			0
90	180	270	5	0	0	0	0	1.91038e-06		0			0
270	180	330	5	0	0	0	0	1.91038e-06		0			0
270	180	30	5	0	0	0	0	1.91038e-06		0			0
270	180	90	5	0	0	0	0	1.91038e-06		0			0
270	180	270	5	0	0	0	0	1.91038e-06		0			0
330	180	330	5	0	0	0	0	1.91038e-06		0			0
330	180	30	5	0	0	0	0	1.91038e-06		0			0
330	180	90	5	0	0	0	0	1.91038e-06		0			0
330	180	270	5	0	0	0	0	1.91038e-06		0			0
30	180	330	5	0	0	0	0	1.91038e-06		0			0
30	180	30	5	0	0	0	0	1.91038e-06		0			0
30	180	90	5	0	0	0	0	1.91038e-06		0			0
30	180	270	5	0	0	0	0	1.91038e-06		0			0
180	180	330	5	-30	-30	0	0	1.91038e-06		0			-60
180	180	30	5	30	30	0	0	1.91038e-06		0			60
180	180	90	5	30	30	0	0	1.91038e-06		0			60
180	180	270	5	-30	-30	0	0	1.91038e-06		0			-60
90	270	330	5	0	0	0	0	1.91038e-06		0			0
90	270	30	5	0	0	0	0	1.91038e-06		0			0
90	270	90	5	0	0	0	0	1.91038e-06		0			0
90	270	180	5	0	0	0	0	1.91038e-06		0			0
270	270	330	5	-30	-30	0	0	1.91038e-06		0			-60
270	270	30	5	-30	-30	0	0	1.91038e-06		0			-60
270	270	90	5	60	59.9999	0.0001	1e-08	1.91038e-06		0.0001			120
270	270	180	5	30	30	0	0	1.90038e-06		0			60
330	270	330	5	0	0	0	0	1.90038e-06		0			0
330	270	30	5	0	0	0	0	1.90038e-06		0			0
330	270	90	5	0	0	0	0	1.90038e-06		0			0
330	270	180	5	-30	-30	0	0	1.90038e-06		0			-60
30	270	330	5	0	0	0	0	1.90038e-06		0			0
30	270	30	5	0	0	0	0	1.90038e-06		0			0
30	270	90	5	0	0	0	0	1.90038e-06		0			0
30	270	180	5	0	0	0	0	1.90038e-06		0			0
180	270	330	5	0	0	0	0	1.90038e-06		0			0
180	270	30	5	0	0	0	0	1.90038e-06		0			0
180	270	90	5	0	0	0	0	1.90038e-06		0			0
180	270	180	5	0	0	0	0	1.90038e-06		0			0
90	30	330	10	60	59.9999	0.0001	1e-08	1.90038e-06		0.0001			120
270	330	30	10	-60	-59.9999	-0.0001	1e-08	1.89038e-06		0.0001			-120
330	90	90	10	0	0	0	0	1.88038e-06		0			0
30	180	180	10	0	0	0	0	1.88038e-06		0			0
180	270	270	10	0	0	0	0	1.88038e-06		0			0
90	330	30	10	0	0	0	0	1.88038e-06		0			0
90	90	90	10	30	30	0	0	1.88038e-06		0			60
90	180	180	10	0	0	0	0	1.88038e-06		0			0
90	270	270	10	0	0	0	0	1.88038e-06		0			0
270	30	330	10	0	0	0	0	1.88038e-06		0			0
270	90	90	10	0	0	0	0	1.88038e-06		0			0
270	180	180	10	0	0	0	0	1.88038e-06		0			0
270	270	270	10	30	30	0	0	1.88038e-06		0			60
330	30	330	10	0	0	0	0	1.88038e-06		0			0
330	330	30	10	0	1.1049e-06	-1.1049e-06	1.2208e-12	1.88038e-06		1.1049e-06			1.1049e-06
330	180	180	10	0	0	0	0	1.88038e-06		0			0
330	270	270	10	0	0	0	0	1.88038e-06		0			0
30	30	330	10	0	0	0	0	1.88038e-06		0			0
30	330	30	10	0	0	0	0	1.88038e-06		0			0
30	90	90	10	0	0	0	0	1.88038e-06		0			0
30	270	270	10	0	0	0	0	1.88038e-06		0			0
180	30	330	10	0	0	0	0	1.88038e-06		0			0
180	330	30	10	0	0	0	0	1.88038e-06		0			0
180	90	90	10	0	0	0	0	1.88038e-06		0			0
180	180	180	10	30	30	0	0	1.88038e-06		0			60
90	330	330	10	0	0	0	0	1.88038e-06		0			0
90	330	90	10	0	0	0	0	1.88038e-06		0			0
90	330	180	10	0	0	0	0	1.88038e-06		0			0
90	330	270	10	0	0	0	0	1.88038e-06		0			0
270	330	330	10	0	0	0	0	1.88038e-06		0			0
270	330	90	10	0	-2.2146e-06	2.2146e-06	4.90445e-12	1.88038e-06		2.2146e-06			-2.2146e-06
270	330	180	10	0	0	0	0	1.88037e-06		0			0
270	330	270	10	0	0	0	0	1.88037e-06		0			0
330	330	330	10	30	30	0	0	1.88037e-06		0			60
330	330	90	10	30	30	0	0	1.88037e-06		0			60
330	330	180	10	30	30	0	0	1.88037e-06		0			60
330	330	270	10	30	30	0	0	1.88037e-06		0			60
30	330	330	10	0	0	0	0	1.88037e-06		0			0
30	330	90	10	0	0	0	0	1.88037e-06		0			0
30	330	180	10	0	0	0	0	1.88037e-06		0			0
30	330	270	10	-60	-59.9999	-0.0001	1e-08	1.88037e-06		0.0001			-120
180	330	330	10	0	0	0	0	1.87037e-06		0			0
180	330	90	10	0	0	0	0	1.87037e-06		0			0
180	330	180	10	0	0	0	0	1.87037e-06		0			0
180	330	270	10	0	0	0	0	1.87037e-06		0			0
90	30	30	10	0	0	0	0	1.87037e-06		0			0
90	30	90	10	0	0	0	0	1.87037e-06		0			0
90	30	180	10	0	0	0	0	1.87037e-06		0			0
90	30	270	10	0	0	0	0	1.87037e-06		0			0
270	30	30	10	0	0	0	0	1.87037e-06		0			0
270	30	90	10	0	0	0	0	1.87037e-06		0			0
270	30	180	10	0	0	0	0	1.87037e-06		0			0
270	30	270	10	0	0	0	0	1.87037e-06		0			0
330	30	30	10	0	-2.2097e-06	2.2097e-06	4.88277e-12	1.87037e-06		2.2097e-06			-2.2097e-06
330	30	90	10	-60	-59.9999	-0.0001	1e-08	1.87037e-06		0.0001			-120
330	30	180	10	0	0	0	0	1.86037e-06		0			0
330	30	270	10	0	0	0	0	1.86037e-06		0			0
30	30	30	10	30	30	0	0	1.86037e-06		0			60
30	30	90	10	-30	-30	0	0	1.86037e-06		0			-60
30	30	180	10	-30	-30	0	0	1.86037e-06		0			-60
30	30	270	10	30	30	0	0	1.86037e-06		0			60
180	30	30	10	0	0	0	0	1.86037e-06		0			0
180	30	90	10	0	0	0	0	1.86037e-06		0			0
180	30	180	10	0	0	0	0	1.86037e-06		0			0
180	30	270	10	0	0	0	0	1.86037e-06		0			0
90	90	330	10	30	30	0	0	1.86037e-06		0			60
90	90	30	10	30	30	0	0	1.86037e-06		0			60
90	90	180	10	-30	-30	0	0	1.86037e-06		0			-60
90	90	270	10	60	59.9999	0.0001	1e-08	1.86037e-06		0.0001			120
270	90	330	10	0	0	0	0	1.85037e-06		0			0
270	90	30	10	0	0	0	0	1.85037e-06		0			0
270	90	180	10	0	0	0	0	1.85037e-06		0			0
270	90	270	10	0	0	0	0	1.85037e-06		0			0
330	90	330	10	0	0	0	0	1.85037e-06		0			0
330	90	30	10	0	0	0	0	1.85037e-06		0			0
330	90	180	10	0	0	0	0	1.85037e-06		0			0
330	90	270	10	0	0	0	0	1.85037e-06		0			0
30	90	330	10	0	0	0	0	1.85037e-06		0			0
30	90	30	10	0	0	0	0	1.85037e-06		0			0
30	90	180	10	30	30	0	0	1.85037e-06		0			60
30	90	270	10	0	0	0	0	1.85037e-06		0			0
180	90	330	10	0	0	0	0	1.85037e-06		0			0
180	90	30	10	0	0	0	0	1.85037e-06		0			0
180	90	180	10	0	0	0	0	1.85037e-06		0			0
180	90	270	10	0	0	0	0	1.85037e-06		0			0
90	180	330	10	0	0	0	0	1.85037e-06		0			0
90	180	30	10	0	0	0	0	1.85037e-06		0			0
90	180	90	10	0	0	0	0	1.85037e-06		0			0
90	180	270	10	0	0	0	0	1.85037e-06		0			0
270	180	330	10	0	0	0	0	1.85037e-06		0			0
270	180	30	10	0	0	0	0	1.85037e-06		0			0
270	180	90	10	0	0	0	0	1.85037e-06		0			0
270	180	270	10	0	0	0	0	1.85037e-06		0			0
330	180	330	10	0	0	0	0	1.85037e-06		0			0
330	180	30	10	0	0	0	0	1.85037e-06		0			0
330	180	90	10	0	0	0	0	1.85037e-06		0			0
330	180	270	10	0	0	0	0	1.85037e-06		0			0
30	180	330	10	0	0	0	0	1.85037e-06		0			0
30	180	30	10	0	0	0	0	1.85037e-06		0			0
30	180	90	10	0	0	0	0	1.85037e-06		0			0
30	180	270	10	0	0	0	0	1.85037e-06		0			0
180	180	330	10	-30	-30	0	0	1.85037e-06		0			-60
180	180	30	10	30	30	0	0	1.85037e-06		0			60
180	180	90	10	30	30	0	0	1.85037e-06		0			60
180	180	270	10	-30	-30	0	0	1.85037e-06		0			-60
90	270	330	10	0	0	0	0	1.85037e-06		0			0
90	270	30	10	0	0	0	0	1.85037e-06		0			0
90	270	90	10	0	0	0	0	1.85037e-06		0			0
90	270	180	10	0	0	0	0	1.85037e-06		0			0
270	270	330	10	-30	-30	0	0	1.85037e-06		0			-60
270	270	30	10	-30	-30	0	0	1.85037e-06		0			-60
270	270	90	10	60	59.9999	0.0001	1e-08	1.85037e-06		0.0001			120
270	270	180	10	30	30	0	0	1.84037e-06		0			60
330	270	330	10	0	0	0	0	1.84037e-06		0			0
330	270	30	10	0	0	0	0	1.84037e-06		0			0
330	270	90	10	0	0	0	0	1.84037e-06		0			0
330	270	180	10	-30	-30	0	0	1.84037e-06		0			-60
30	270	330	10	0	0	0	0	1.84037e-06		0			0
30	270	30	10	0	0	0	0	1.84037e-06		0			0
30	270	90	10	0	0	0	0	1.84037e-06		0			0
30	270	180	10	0	0	0	0	1.84037e-06		0			0
180	270	330	10	0	0	0	0	1.84037e-06		0			0
180	270	30	10	0	0	0	0	1.84037e-06		0			0
180	270	90	10	0	0	0	0	1.84037e-06		0			0
180	270	180	10	0	0	0	0	1.84037e-06		0			0
90	30	330	15	60	59.9999	0.0001	1e-08	1.84037e-06		0.0001			120
270	330	30	15	60	59.9999	0.0001	1e-08	1.83037e-06		0.0001			120
330	90	90	15	-60	-59.9999	-0.0001	1e-08	1.82037e-06		0.0001			-120
30	180	180	15	0	0	0	0	1.81037e-06		0			0
180	270	270	15	0	0	0	0	1.81037e-06		0			0
90	330	30	15	0	0	0	0	1.81037e-06		0			0
90	90	90	15	0	0	0	0	1.81037e-06		0			0
90	180	180	15	0	0	0	0	1.81037e-06		0			0
90	270	270	15	0	0	0	0	1.81037e-06		0			0
270	30	330	15	0	0	0	0	1.81037e-06		0			0
270	90	90	15	0	0	0	0	1.81037e-06		0			0
270	180	180	15	0	0	0	0	1.81037e-06		0			0
270	270	270	15	0	0	0	0	1.81037e-06		0			0
330	30	330	15	0	0	0	0	1.81037e-06		0			0
330	330	30	15	0	0	0	0	1.81037e-06		0			0
330	180	180	15	0	0	0	0	1.81037e-06		0			0
330	270	270	15	0	0	0	0	1.81037e-06		0			0
30	30	330	15	0	0	0	0	1.81037e-06		0			0
30	330	30	15	0	0	0	0	1.81037e-06		0			0
30	90	90	15	0	0	0	0	1.81037e-06		0			0
30	270	270	15	0	0	0	0	1.81037e-06		0			0
180	30	330	15	0	0	0	0	1.81037e-06		0			0
180	330	30	15	0	0	0	0	1.81037e-06		0			0
180	90	90	15	0	0	0	0	1.81037e-06		0			0
180	180	180	15	0	0	0	0	1.81037e-06		0			0
90	330	330	15	0	0	0	0	1.81037e-06		0			0
90	330	90	15	0	0	0	0	1.81037e-06		0			0
90	330	180	15	0	0	0	0	1.81037e-06		0			0
90	330	270	15	0	0	0	0	1.81037e-06		0			0
270	330	330	15	0	0	0	0	1.81037e-06		0			0
270	330	90	15	0	2.2047e-06	-2.2047e-06	4.8607e-12	1.81037e-06		2.2047e-06			2.2047e-06
270	330	180	15	0	0	0	0	1.81036e-06		0			0
270	330	270	15	0	0	0	0	1.81036e-06		0			0
330	330	330	15	0	0	0	0	1.81036e-06		0			0
330	330	90	15	0	0	0	0	1.81036e-06		0			0
330	330	180	15	0	0	0	0	1.81036e-06		0			0
330	330	270	15	30	30	0	0	1.81036e-06		0			60
30	330	330	15	0	0	0	0	1.81036e-06		0			0
30	330	90	15	0	0	0	0	1.81036e-06		0			0
30	330	180	15	0	0	0	0	1.81036e-06		0			0
30	330	270	15	0	0	0	0	1.81036e-06		0			0
180	330	330	15	60	59.9999	0.0001	1e-08	1.81036e-06		0.0001			120
180	330	90	15	0	0	0	0	1.80036e-06		0			0
180	330	180	15	0	0	0	0	1.80036e-06		0			0
180	330	270	15	0	0	0	0	1.80036e-06		0			0
90	30	30	15	0	0	0	0	1.80036e-06		0			0
90	30	90	15	0	0	0	0	1.80036e-06		0			0
90	30	180	15	0	0	0	0	1.80036e-06		0			0
90	30	270	15	0	0	0	0	1.80036e-06		0			0
270	30	30	15	0	0	0	0	1.80036e-06		0			0
270	30	90	15	0	0	0	0	1.80036e-06		0			0
270	30	180	15	0	0	0	0	1.80036e-06		0			0
270	30	270	15	0	0	0	0	1.80036e-06		0			0
330	30	30	15	0	0	0	0	1.80036e-06		0			0
330	30	90	15	0	0	0	0	1.80036e-06		0			0
330	30	180	15	360	360	0.0004	1.6e-07	1.80036e-06		0.0004			720
330	30	270	15	0	0	0	0	1.64036e-06		0			0
30	30	30	15	0	0	0	0	1.64036e-06		0			0
30	30	90	15	0	0	0	0	1.64036e-06		0			0
30	30	180	15	0	0	0	0	1.64036e-06		0			0
30	30	270	15	-30	-30	0	0	1.64036e-06		0			-60
180	30	30	15	0	0	0	0	1.64036e-06		0			0
180	30	90	15	0	0	0	0	1.64036e-06		0			0
180	30	180	15	0	0	0	0	1.64036e-06		0			0
180	30	270	15	0	0	0	0	1.64036e-06		0			0
90	90	330	15	0	0	0	0	1.64036e-06		0			0
90	90	30	15	0	0	0	0	1.64036e-06		0			0
90	90	180	15	0	0	0	0	1.64036e-06		0			0
90	90	270	15	0	0	0	0	1.64036e-06		0			0
270	90	330	15	60	59.9999	0.0001	1e-08	1.64036e-06		0.0001			120
270	90	30	15	0	0	0	0	1.63036e-06		0			0
270	90	180	15	0	0	0	0	1.63036e-06		0			0
270	90	270	15	0	0	0	0	1.63036e-06		0			0
330	90	330	15	0	0	0	0	1.63036e-06		0			0
330	90	30	15	0	-2.2049e-06	2.2049e-06	4.86158e-12	1.63036e-06		2.2049e-06			-2.2049e-06
330	90	180	15	0	0	0	0	1.63036e-06		0			0
330	90	270	15	0	0	0	0	1.63036e-06		0			0
30	90	330	15	0	0	0	0	1.63036e-06		0			0
30	90	30	15	0	0	0	0	1.63036e-06		0			0
30	90	180	15	0	0	0	0	1.63036e-06		0			0
30	90	270	15	360	360	0.0004	1.6e-07	1.63036e-06		0.0004			720
180	90	330	15	0	0	0	0	1.47036e-06		0			0
180	90	30	15	0	0	0	0	1.47036e-06		0			0
180	90	180	15	-30	-30	0	0	1.47036e-06		0			-60
180	90	270	15	0	0	0	0	1.47036e-06		0			0
90	180	330	15	0	0	0	0	1.47036e-06		0			0
90	180	30	15	0	0	0	0	1.47036e-06		0			0
90	180	90	15	0	0	0	0	1.47036e-06		0			0
90	180	270	15	0	0	0	0	1.47036e-06		0			0
270	180	330	15	0	0	0	0	1.47036e-06		0			0
270	180	30	15	0	0	0	0	1.47036e-06		0			0
270	180	90	15	0	0	0	0	1.47036e-06		0			0
270	180	270	15	0	0	0	0	1.47036e-06		0			0
330	180	330	15	0	0	0	0	1.47036e-06		0			0
330	180	30	15	0	0	0	0	1.47036e-06		0			0
330	180	90	15	0	0	0	0	1.47036e-06		0			0
330	180	270	15	0	0	0	0	1.47036e-06		0			0
30	180	330	15	0	0	0	0	1.47036e-06		0			0
30	180	30	15	0	0	0	0	1.47036e-06		0			0
30	180	90	15	0	0	0	0	1.47036e-06		0			0
30	180	270	15	0	0	0	0	1.47036e-06		0			0
180	180	330	15	0	0	0	0	1.47036e-06		0			0
180	180	30	15	-30	-30	0	0	1.47036e-06		0			-60
180	180	90	15	30	30	0	0	1.47036e-06		0			60
180	180	270	15	0	0	0	0	1.47036e-06		0			0
90	270	330	15	0	0	0	0	1.47036e-06		0			0
90	270	30	15	0	0	0	0	1.47036e-06		0			0
90	270	90	15	0	0	0	0	1.47036e-06		0			0
90	270	180	15	0	0	0	0	1.47036e-06		0			0
270	270	330	15	0	0	0	0	1.47036e-06		0			0
270	270	30	15	0	0	0	0	1.47036e-06		0			0
270	270	90	15	0	0	0	0	1.47036e-06		0			0
270	270	180	15	60	59.9999	0.0001	1e-08	1.47036e-06		0.0001			120
330	270	330	15	0	0	0	0	1.46036e-06		0			0
330	270	30	15	0	0	0	0	1.46036e-06		0			0
330	270	90	15	0	0	0	0	1.46036e-06		0			0
330	270	180	15	0	0	0	0	1.46036e-06		0			0
30	270	330	15	360	360	0.0004	1.6e-07	1.46036e-06		0.0004			720
30	270	30	15	0	0	0	0	1.30036e-06		0			0
30	270	90	15	0	0	0	0	1.30036e-06		0			0
30	270	180	15	0	0	0	0	1.30036e-06		0			0
180	270	330	15	0	0	0	0	1.30036e-06		0			0
180	270	30	15	30	30	0	0	1.30036e-06		0			60
180	270	90	15	0	1.1024e-06	-1.1024e-06	1.21529e-12	1.30036e-06		1.1024e-06			1.1024e-06
180	270	180	15	0	0	0	0	1.30036e-06		0			0
90	30	330	25	360	360	0.0004	1.6e-07	1.30036e-06		0.0004			720
270	330	30	25	360	360	0.0004	1.6e-07	1.14036e-06		0.0004			720
330	90	90	25	0	0	0	0	9.80357e-07		0			0
30	180	180	25	0	0	0	0	9.80357e-07		0			0
180	270	270	25	0	0	0	0	9.80357e-07		0			0
90	330	30	25	0	0	0	0	9.80357e-07		0			0
90	90	90	25	0	0	0	0	9.80357e-07		0			0
90	180	180	25	0	0	0	0	9.80357e-07		0			0
90	270	270	25	0	0	0	0	9.80357e-07		0			0
270	30	330	25	0	0	0	0	9.80357e-07		0			0
270	90	90	25	0	0	0	0	9.80357e-07		0			0
270	180	180	25	0	0	0	0	9.80357e-07		0			0
270	270	270	25	0	0	0	0	9.80357e-07		0			0
330	30	330	25	0	0	0	0	9.80357e-07		0			0
330	330	30	25	0	0	0	0	9.80357e-07		0			0
330	180	180	25	0	0	0	0	9.80357e-07		0			0
330	270	270	25	0	0	0	0	9.80357e-07		0			0
30	30	330	25	0	0	0	0	9.80357e-07		0			0
30	330	30	25	0	0	0	0	9.80357e-07		0			0
30	90	90	25	0	0	0	0	9.80357e-07		0			0
30	270	270	25	0	0	0	0	9.80357e-07		0			0
180	30	330	25	0	0	0	0	9.80357e-07		0			0
180	330	30	25	0	0	0	0	9.80357e-07		0			0
180	90	90	25	0	1.323e-05	-1.323e-05	1.75033e-10	9.80357e-07		1.323e-05			1.323e-05
180	180	180	25	0	0	0	0	9.80182e-07		0			0
90	330	330	25	0	0	0	0	9.80182e-07		0			0
90	330	90	25	0	0	0	0	9.80182e-07		0			0
90	330	180	25	0	0	0	0	9.80182e-07		0			0
90	330	270	25	30	30	0	0	9.80182e-07		0			60
270	330	330	25	0	0	0	0	9.80182e-07		0			0
270	330	90	25	30	30	0	0	9.80182e-07		0			60
270	330	180	25	0	0	0	0	9.80182e-07		0			0
270	330	270	25	0	0	0	0	9.80182e-07		0			0
330	330	330	25	0	0	0	0	9.80182e-07		0			0
330	330	90	25	0	0	0	0	9.80182e-07		0			0
330	330	180	25	30	30	0	0	9.80182e-07		0			60
330	330	270	25	0	0	0	0	9.80182e-07		0			0
30	330	330	25	0	0	0	0	9.80182e-07		0			0
30	330	90	25	0	0	0	0	9.80182e-07		0			0
30	330	180	25	0	0	0	0	9.80182e-07		0			0
30	330	270	25	360	360	0.0004	1.6e-07	9.80182e-07		0.0004			720
180	330	330	25	0	0	0	0	8.20182e-07		0			0
180	330	90	25	0	0	0	0	8.20182e-07		0			0
180	330	180	25	0	0	0	0	8.20182e-07		0			0
180	330	270	25	0	0	0	0	8.20182e-07		0			0
90	30	30	25	0	0	0	0	8.20182e-07		0			0
90	30	90	25	0	0	0	0	8.20182e-07		0			0
90	30	180	25	0	0	0	0	8.20182e-07		0			0
90	30	270	25	-30	-30	0	0	8.20182e-07		0			-60
270	30	30	25	0	-1.1025e-06	1.1025e-06	1.21551e-12	8.20182e-07		1.1025e-06			-1.1025e-06
270	30	90	25	-30	-30	0	0	8.20181e-07		0			-60
270	30	180	25	0	0	0	0	8.20181e-07		0			0
270	30	270	25	0	0	0	0	8.20181e-07		0			0
330	30	30	25	0	1.323e-05	-1.323e-05	1.75033e-10	8.20181e-07		1.323e-05			1.323e-05
330	30	90	25	360	360	0.0004	1.6e-07	8.20006e-07		0.0004			720
330	30	180	25	0	0	0	0	6.60006e-07		0			0
330	30	270	25	0	0	0	0	6.60006e-07		0			0
30	30	30	25	0	0	0	0	6.60006e-07		0			0
30	30	90	25	0	0	0	0	6.60006e-07		0			0
30	30	180	25	-30	-30	0	0	6.60006e-07		0			-60
30	30	270	25	0	0	0	0	6.60006e-07		0			0
180	30	30	25	0	0	0	0	6.60006e-07		0			0
180	30	90	25	0	0	0	0	6.60006e-07		0			0
180	30	180	25	0	0	0	0	6.60006e-07		0			0
180	30	270	25	0	0	0	0	6.60006e-07		0			0
90	90	330	25	0	0	0	0	6.60006e-07		0			0
90	90	30	25	0	0	0	0	6.60006e-07		0			0
90	90	180	25	0	0	0	0	6.60006e-07		0			0
90	90	270	25	60	59.9999	0.0001	1e-08	6.60006e-07		0.0001			120
270	90	330	25	0	0	0	0	6.50006e-07		0			0
270	90	30	25	0	0	0	0	6.50006e-07		0			0
270	90	180	25	0	0	0	0	6.50006e-07		0			0
270	90	270	25	0	0	0	0	6.50006e-07		0			0
330	90	330	25	0	0	0	0	6.50006e-07		0			0
330	90	30	25	0	0	0	0	6.50006e-07		0			0
330	90	180	25	0	0	0	0	6.50006e-07		0			0
330	90	270	25	0	0	0	0	6.50006e-07		0			0
30	90	330	25	0	0	0	0	6.50006e-07		0			0
30	90	30	25	0	0	0	0	6.50006e-07		0			0
30	90	180	25	360	360	0.0004	1.6e-07	6.50006e-07		0.0004			720
30	90	270	25	0	0	0	0	4.90006e-07		0			0
180	90	330	25	0	0	0	0	4.90006e-07		0			0
180	90	30	25	360	360	0.0004	1.6e-07	4.90006e-07		0.0004			720
180	90	180	25	0	0	0	0	3.30006e-07		0			0
180	90	270	25	0	0	0	0	3.30006e-07		0			0
90	180	330	25	0	0	0	0	3.30006e-07		0			0
90	180	30	25	0	0	0	0	3.30006e-07		0			0
90	180	90	25	0	0	0	0	3.30006e-07		0			0
90	180	270	25	0	0	0	0	3.30006e-07		0			0
270	180	330	25	0	0	0	0	3.30006e-07		0			0
270	180	30	25	0	0	0	0	3.30006e-07		0			0
270	180	90	25	0	0	0	0	3.30006e-07		0			0
270	180	270	25	0	0	0	0	3.30006e-07		0			0
330	180	330	25	0	0	0	0	3.30006e-07		0			0
330	180	30	25	0	0	0	0	3.30006e-07		0			0
330	180	90	25	0	0	0	0	3.30006e-07		0			0
330	180	270	25	0	0	0	0	3.30006e-07		0			0
30	180	330	25	0	0	0	0	3.30006e-07		0			0
30	180	30	25	0	0	0	0	3.30006e-07		0			0
30	180	90	25	0	0	0	0	3.30006e-07		0			0
30	180	270	25	0	0	0	0	3.30006e-07		0			0
180	180	330	25	-30	-30	0	0	3.30006e-07		0			-60
180	180	30	25	30	30	0	0	3.30006e-07		0			60
180	180	90	25	0	1.1024e-06	-1.1024e-06	1.21529e-12	3.30006e-07		1.1024e-06			1.1024e-06
180	180	270	25	0	0	0	0	3.30005e-07		0			0
90	270	330	25	0	0	0	0	3.30005e-07		0			0
90	270	30	25	0	0	0	0	3.30005e-07		0			0
90	270	90	25	0	0	0	0	3.30005e-07		0			0
90	270	180	25	0	0	0	0	3.30005e-07		0			0
270	270	330	25	0	0	0	0	3.30005e-07		0			0
270	270	30	25	0	2.205e-06	-2.205e-06	4.86202e-12	3.30005e-07		2.205e-06			2.205e-06
270	270	90	25	60	59.9999	0.0001	1e-08	3.3e-07		0.0001			120
270	270	180	25	0	0	0	0	3.2e-07		0			0
330	270	330	25	0	0	0	0	3.2e-07		0			0
330	270	30	25	0	0	0	0	3.2e-07		0			0
330	270	90	25	0	0	0	0	3.2e-07		0			0
330	270	180	25	360	360	0.0004	1.6e-07	3.2e-07		0.0004			720
30	270	330	25	0	0	0	0	1.6e-07		0			0
30	270	30	25	0	0	0	0	1.6e-07		0			0
30	270	90	25	0	0	0	0	1.6e-07		0			0
30	270	180	25	0	0	0	0	1.6e-07		0			0
180	270	330	25	360	360	0.0004	1.6e-07	1.6e-07		0.0004			720
180	270	30	25	0	0	0	0	0		0			0
180	270	90	25	0	0	0	0	0		0			0
180	270	180	25	0	0	0	0	0		0			0
