# Supplementary material for: The Neural-Fuzzy Approach as a Way of Preventing a Maritime Vessel Accident in a Heavy Traffic Zone
Source: Hindawi journal article supplement (doi:10.1155/2018/2367096), 2018-08-15
Supplement: f8 [file 2367096.f8.xlsx]

## Sheet: Лист1
1 input LV	2 input LV	3 input LV	4 input LV	Known value LV output	out	(output-out)	G1^2	sum	RMSE	|output-out|	sum	MAE	output+out	sum	SMAPE
90	330	0	0	0	-3.2203e-06	3.2203e-06	1.03703e-11	9.78147	0.136497	3.2203e-06	18.5788	0.0353881	-3.2203e-06	9761.54	0.00190326
270	330	0	0	0	-0.0013	0.0013	1.69e-06			0.0013			-0.0013
330	330	0	0	30	29.9983	0.0017	2.89e-06			0.0017			59.9983
30	330	0	0	0	-3.7047e-05	3.7047e-05	1.37248e-09			3.7047e-05			-3.7047e-05
180	330	0	0	0	-9.8951e-05	9.8951e-05	9.7913e-09			9.8951e-05			-9.8951e-05
90	30	0	0	0	9.2057e-05	-9.2057e-05	8.47449e-09			9.2057e-05			9.2057e-05
270	30	0	0	0	-2.6064e-06	2.6064e-06	6.79332e-12			2.6064e-06			-2.6064e-06
330	30	0	0	0	4.1486e-07	-4.1486e-07	1.72109e-13			4.1486e-07			4.1486e-07
30	30	0	0	30	30.0004	-0.0004	1.6e-07			0.0004			60.0004
180	30	0	0	0	5.2762e-06	-5.2762e-06	2.78383e-11			5.2762e-06			5.2762e-06
90	90	0	0	30	30	0	0			0			60
270	90	0	0	0	3.2427e-06	-3.2427e-06	1.05151e-11			3.2427e-06			3.2427e-06
330	90	0	0	0	-2.1424e-05	2.1424e-05	4.58988e-10			2.1424e-05			-2.1424e-05
30	90	0	0	0	-9.64e-05	9.64e-05	9.29296e-09			9.64e-05			-9.64e-05
180	90	0	0	0	5.5342e-07	-5.5342e-07	3.06274e-13			5.5342e-07			5.5342e-07
90	180	0	0	0	5.2526e-06	-5.2526e-06	2.75898e-11			5.2526e-06			5.2526e-06
270	180	0	0	0	-6.6428e-05	6.6428e-05	4.41268e-09			6.6428e-05			-6.6428e-05
330	180	0	0	0	-9.9939e-05	9.9939e-05	9.9878e-09			9.9939e-05			-9.9939e-05
30	180	0	0	0	2.3658e-05	-2.3658e-05	5.59701e-10			2.3658e-05			2.3658e-05
180	180	0	0	30	30	0	0			0			60
90	270	0	0	0	-3.4648e-06	3.4648e-06	1.20048e-11			3.4648e-06			-3.4648e-06
270	270	0	0	30	29.9991	0.0009	8.1e-07			0.0009			59.9991
330	270	0	0	0	-0.0012	0.0012	1.44e-06			0.0012			-0.0012
30	270	0	0	0	7.2394e-06	-7.2394e-06	5.24089e-11			7.2394e-06			7.2394e-06
180	270	0	0	0	-6.3076e-05	6.3076e-05	3.97858e-09			6.3076e-05			-6.3076e-05
90	30	330	5	-30	-30	0	0			0			-60
270	330	30	5	0	-0.004	0.004	1.6e-05			0.004			-0.004
330	90	90	5	0	-2.0416e-05	2.0416e-05	4.16813e-10			2.0416e-05			-2.0416e-05
30	180	180	5	0	-9.5567e-06	9.5567e-06	9.13305e-11			9.5567e-06			-9.5567e-06
180	270	270	5	0	-0.0378	0.0378	0.00142884			0.0378			-0.0378
90	330	30	5	0	-2.7317e-05	2.7317e-05	7.46218e-10			2.7317e-05			-2.7317e-05
90	90	90	5	30	30	0	0			0			60
90	180	180	5	0	-3.989e-05	3.989e-05	1.59121e-09			3.989e-05			-3.989e-05
90	270	270	5	0	-0.0026	0.0026	6.76e-06			0.0026			-0.0026
270	30	330	5	0	-0.0034	0.0034	1.156e-05			0.0034			-0.0034
270	90	90	5	0	-5.6553e-05	5.6553e-05	3.19824e-09			5.6553e-05			-5.6553e-05
270	180	180	5	0	-0.0089	0.0089	7.921e-05			0.0089			-0.0089
270	270	270	5	30	29.6297	0.3703	0.137122			0.3703			59.6297
330	30	330	5	0	-0.0045	0.0045	2.025e-05			0.0045			-0.0045
330	330	30	5	0	-0.0054	0.0054	2.916e-05			0.0054			-0.0054
330	180	180	5	0	-0.0125	0.0125	0.00015625			0.0125			-0.0125
330	270	270	5	0	-0.4674	0.4674	0.218463			0.4674			-0.4674
30	30	330	5	0	-7.1653e-06	7.1653e-06	5.13415e-11			7.1653e-06			-7.1653e-06
30	330	30	5	0	0.00022889	-0.00022889	5.23906e-08			0.00022889			0.00022889
30	90	90	5	0	-6.0765e-05	6.0765e-05	3.69239e-09			6.0765e-05			-6.0765e-05
30	270	270	5	0	-0.0011	0.0011	1.21e-06			0.0011			-0.0011
180	30	330	5	0	-0.00024461	0.00024461	5.98341e-08			0.00024461			-0.00024461
180	330	30	5	0	-0.00031406	0.00031406	9.86337e-08			0.00031406			-0.00031406
180	90	90	5	0	6.3337e-05	-6.3337e-05	4.01158e-09			6.3337e-05			6.3337e-05
180	180	180	5	30	29.9994	0.0006	3.6e-07			0.0006			59.9994
90	330	330	5	0	-0.0045	0.0045	2.025e-05			0.0045			-0.0045
90	330	90	5	0	-3.4455e-05	3.4455e-05	1.18715e-09			3.4455e-05			-3.4455e-05
90	330	180	5	0	-0.00048666	0.00048666	2.36838e-07			0.00048666			-0.00048666
90	330	270	5	0	-0.0034	0.0034	1.156e-05			0.0034			-0.0034
270	330	330	5	0	-0.5835	0.5835	0.340472			0.5835			-0.5835
270	330	90	5	0	-0.0102	0.0102	0.00010404			0.0102			-0.0102
270	330	180	5	0	-0.0871	0.0871	0.00758641			0.0871			-0.0871
270	330	270	5	0	-0.4828	0.4828	0.233096			0.4828			-0.4828
330	330	330	5	30	29.282	0.718	0.515524			0.718			59.282
330	330	90	5	30	29.9877	0.0123	0.00015129			0.0123			59.9877
330	330	180	5	30	29.8906	0.1094	0.0119684			0.1094			59.8906
330	330	270	5	30	29.4032	0.5968	0.35617			0.5968			59.4032
30	330	330	5	0	-0.002	0.002	4e-06			0.002			-0.002
30	330	90	5	0	-0.00010376	0.00010376	1.07661e-08			0.00010376			-0.00010376
30	330	180	5	0	-0.00020075	0.00020075	4.03006e-08			0.00020075			-0.00020075
30	330	270	5	-30	-30.0015	0.0015	2.25e-06			0.0015			-60.0015
180	330	330	5	0	-0.0635	0.0635	0.00403225			0.0635			-0.0635
180	330	90	5	0	-0.00070763	0.00070763	5.0074e-07			0.00070763			-0.00070763
180	330	180	5	0	-0.0082	0.0082	6.724e-05			0.0082			-0.0082
180	330	270	5	0	-0.0509	0.0509	0.00259081			0.0509			-0.0509
90	30	30	5	0	-0.00069565	0.00069565	4.83929e-07			0.00069565			-0.00069565
90	30	90	5	0	0.00028994	-0.00028994	8.40652e-08			0.00028994			0.00028994
90	30	180	5	0	4.3528e-05	-4.3528e-05	1.89469e-09			4.3528e-05			4.3528e-05
90	30	270	5	0	-1.3709e-05	1.3709e-05	1.87937e-10			1.3709e-05			-1.3709e-05
270	30	30	5	0	6.5599e-06	-6.5599e-06	4.30323e-11			6.5599e-06			6.5599e-06
270	30	90	5	0	-1.5822e-05	1.5822e-05	2.50336e-10			1.5822e-05			-1.5822e-05
270	30	180	5	0	-0.00031521	0.00031521	9.93573e-08			0.00031521			-0.00031521
270	30	270	5	0	-0.0026	0.0026	6.76e-06			0.0026			-0.0026
330	30	30	5	0	-4.0712e-05	4.0712e-05	1.65747e-09			4.0712e-05			-4.0712e-05
330	30	90	5	-60	-60	0	0			0			-120
330	30	180	5	0	-0.00046269	0.00046269	2.14082e-07			0.00046269			-0.00046269
330	30	270	5	0	-0.0036	0.0036	1.296e-05			0.0036			-0.0036
30	30	30	5	30	29.9998	0.0002	4e-08			0.0002			59.9998
30	30	90	5	-30	-30.0001	0.0001	1e-08			0.0001			-60.0001
30	30	180	5	-30	-30	0	0			0			-60
30	30	270	5	30	30	0	0			0			60
180	30	30	5	0	-6.7469e-05	6.7469e-05	4.55207e-09			6.7469e-05			-6.7469e-05
180	30	90	5	0	-2.6526e-06	2.6526e-06	7.03629e-12			2.6526e-06			-2.6526e-06
180	30	180	5	0	-1.8529e-05	1.8529e-05	3.43324e-10			1.8529e-05			-1.8529e-05
180	30	270	5	0	-0.00017353	0.00017353	3.01127e-08			0.00017353			-0.00017353
90	90	330	5	30	29.9999	0.0001	1e-08			0.0001			59.9999
90	90	30	5	30	30.0001	-0.0001	1e-08			0.0001			60.0001
90	90	180	5	-30	-30	0	0			0			-60
90	90	270	5	60	60	0	0			0			120
270	90	330	5	0	-0.0078	0.0078	6.084e-05			0.0078			-0.0078
270	90	30	5	0	-8.1154e-05	8.1154e-05	6.58597e-09			8.1154e-05			-8.1154e-05
270	90	180	5	0	-0.0006793	0.0006793	4.61448e-07			0.0006793			-0.0006793
270	90	270	5	0	-0.0069	0.0069	4.761e-05			0.0069			-0.0069
330	90	330	5	0	-0.0099	0.0099	9.801e-05			0.0099			-0.0099
330	90	30	5	0	6.9244e-05	-6.9244e-05	4.79473e-09			6.9244e-05			6.9244e-05
330	90	180	5	0	-0.00099085	0.00099085	9.81784e-07			0.00099085			-0.00099085
330	90	270	5	0	-0.0084	0.0084	7.056e-05			0.0084			-0.0084
30	90	330	5	0	2.6883e-06	-2.6883e-06	7.22696e-12			2.6883e-06			2.6883e-06
30	90	30	5	0	0.00031263	-0.00031263	9.77375e-08			0.00031263			0.00031263
30	90	180	5	30	30	0	0			0			60
30	90	270	5	0	-1.0439e-05	1.0439e-05	1.08973e-10			1.0439e-05			-1.0439e-05
180	90	330	5	0	-0.00053342	0.00053342	2.84537e-07			0.00053342			-0.00053342
180	90	30	5	0	-6.9213e-06	6.9213e-06	4.79044e-11			6.9213e-06			-6.9213e-06
180	90	180	5	0	-4.0447e-05	4.0447e-05	1.63596e-09			4.0447e-05			-4.0447e-05
180	90	270	5	0	-0.00039562	0.00039562	1.56515e-07			0.00039562			-0.00039562
90	180	330	5	0	-0.00038181	0.00038181	1.45779e-07			0.00038181			-0.00038181
90	180	30	5	0	-8.1052e-05	8.1052e-05	6.56943e-09			8.1052e-05			-8.1052e-05
90	180	90	5	0	0.00041798	-0.00041798	1.74707e-07			0.00041798			0.00041798
90	180	270	5	0	-0.00025202	0.00025202	6.35141e-08			0.00025202			-0.00025202
270	180	330	5	0	-0.0928	0.0928	0.00861184			0.0928			-0.0928
270	180	30	5	0	-2.3344e-05	2.3344e-05	5.44942e-10			2.3344e-05			-2.3344e-05
270	180	90	5	0	-0.00064476	0.00064476	4.15715e-07			0.00064476			-0.00064476
270	180	270	5	0	-0.0735	0.0735	0.00540225			0.0735			-0.0735
330	180	330	5	0	-0.1218	0.1218	0.0148352			0.1218			-0.1218
330	180	30	5	0	-0.00035374	0.00035374	1.25132e-07			0.00035374			-0.00035374
330	180	90	5	0	-0.00093719	0.00093719	8.78325e-07			0.00093719			-0.00093719
330	180	270	5	0	-0.097	0.097	0.009409			0.097			-0.097
30	180	330	5	0	-0.00019063	0.00019063	3.63398e-08			0.00019063			-0.00019063
30	180	30	5	0	-0.00024293	0.00024293	5.9015e-08			0.00024293			-0.00024293
30	180	90	5	0	-2.7836e-05	2.7836e-05	7.74843e-10			2.7836e-05			-2.7836e-05
30	180	270	5	0	-0.00010618	0.00010618	1.12742e-08			0.00010618			-0.00010618
180	180	330	5	-30	-30.0069	0.0069	4.761e-05			0.0069			-60.0069
180	180	30	5	30	30	0	0			0			60
180	180	90	5	30	30	0	0			0			60
180	180	270	5	-30	-30.0052	0.0052	2.704e-05			0.0052			-60.0052
90	270	330	5	0	-0.003	0.003	9e-06			0.003			-0.003
90	270	30	5	0	3.7073e-07	-3.7073e-07	1.37441e-13			3.7073e-07			3.7073e-07
90	270	90	5	0	-5.1273e-05	5.1273e-05	2.62892e-09			5.1273e-05			-5.1273e-05
90	270	180	5	0	-0.00034429	0.00034429	1.18536e-07			0.00034429			-0.00034429
270	270	330	5	-30	-30.4551	0.4551	0.207116			0.4551			-60.4551
270	270	30	5	-30	-30.0028	0.0028	7.84e-06			0.0028			-60.0028
270	270	90	5	60	59.9935	0.0065	4.225e-05			0.0065			119.993
270	270	180	5	30	29.9368	0.0632	0.00399424			0.0632			59.9368
330	270	330	5	0	-0.5706	0.5706	0.325584			0.5706			-0.5706
330	270	30	5	0	-0.0038	0.0038	1.444e-05			0.0038			-0.0038
330	270	90	5	0	-0.0086	0.0086	7.396e-05			0.0086			-0.0086
330	270	180	5	-30	-30.0826	0.0826	0.00682276			0.0826			-60.0826
30	270	330	5	0	-0.0015	0.0015	2.25e-06			0.0015			-0.0015
30	270	30	5	0	-9.1205e-05	9.1205e-05	8.31835e-09			9.1205e-05			-9.1205e-05
30	270	90	5	0	1.5864e-05	-1.5864e-05	2.51666e-10			1.5864e-05			1.5864e-05
30	270	180	5	0	-0.00014253	0.00014253	2.03148e-08			0.00014253			-0.00014253
180	270	330	5	0	-0.0482	0.0482	0.00232324			0.0482			-0.0482
180	270	30	5	0	-0.0002064	0.0002064	4.2601e-08			0.0002064			-0.0002064
180	270	90	5	0	-0.00050165	0.00050165	2.51653e-07			0.00050165			-0.00050165
180	270	180	5	0	-0.0058	0.0058	3.364e-05			0.0058			-0.0058
90	30	330	10	60	59.9999	0.0001	1e-08			0.0001			120
270	330	30	10	-60	-60.0046	0.0046	2.116e-05			0.0046			-120.005
330	90	90	10	0	-0.00052539	0.00052539	2.76035e-07			0.00052539			-0.00052539
30	180	180	10	0	-1.4778e-05	1.4778e-05	2.18389e-10			1.4778e-05			-1.4778e-05
180	270	270	10	0	-0.0433	0.0433	0.00187489			0.0433			-0.0433
90	330	30	10	0	-0.00023579	0.00023579	5.55969e-08			0.00023579			-0.00023579
90	90	90	10	30	29.9999	0.0001	1e-08			0.0001			59.9999
90	180	180	10	0	4.8844e-05	-4.8844e-05	2.38574e-09			4.8844e-05			4.8844e-05
90	270	270	10	0	-0.0025	0.0025	6.25e-06			0.0025			-0.0025
270	30	330	10	0	-0.0037	0.0037	1.369e-05			0.0037			-0.0037
270	90	90	10	0	4.8518e-05	-4.8518e-05	2.354e-09			4.8518e-05			4.8518e-05
270	180	180	10	0	-0.0094	0.0094	8.836e-05			0.0094			-0.0094
270	270	270	10	30	29.5566	0.4434	0.196604			0.4434			59.5566
330	30	330	10	0	-0.0049	0.0049	2.401e-05			0.0049			-0.0049
330	330	30	10	0	-0.0059	0.0059	3.481e-05			0.0059			-0.0059
330	180	180	10	0	-0.0143	0.0143	0.00020449			0.0143			-0.0143
330	270	270	10	0	-0.5448	0.5448	0.296807			0.5448			-0.5448
30	30	330	10	0	1.1803e-05	-1.1803e-05	1.39311e-10			1.1803e-05			1.1803e-05
30	330	30	10	0	-2.0639e-05	2.0639e-05	4.25968e-10			2.0639e-05			-2.0639e-05
30	90	90	10	0	3.9906e-05	-3.9906e-05	1.59249e-09			3.9906e-05			3.9906e-05
30	270	270	10	0	-0.0014	0.0014	1.96e-06			0.0014			-0.0014
180	30	330	10	0	-0.00026458	0.00026458	7.00026e-08			0.00026458			-0.00026458
180	330	30	10	0	-0.00035846	0.00035846	1.28494e-07			0.00035846			-0.00035846
180	90	90	10	0	-0.00023692	0.00023692	5.61311e-08			0.00023692			-0.00023692
180	180	180	10	30	29.9993	0.0007	4.9e-07			0.0007			59.9993
90	330	330	10	0	-0.0052	0.0052	2.704e-05			0.0052			-0.0052
90	330	90	10	0	1.0144e-05	-1.0144e-05	1.02901e-10			1.0144e-05			1.0144e-05
90	330	180	10	0	-0.00052946	0.00052946	2.80328e-07			0.00052946			-0.00052946
90	330	270	10	0	-0.0043	0.0043	1.849e-05			0.0043			-0.0043
270	330	330	10	0	-0.7084	0.7084	0.501831			0.7084			-0.7084
270	330	90	10	0	-0.0099	0.0099	9.801e-05			0.0099			-0.0099
270	330	180	10	0	-0.0967	0.0967	0.00935089			0.0967			-0.0967
270	330	270	10	0	-0.592	0.592	0.350464			0.592			-0.592
330	330	330	10	30	29.1572	0.8428	0.710312			0.8428			59.1572
330	330	90	10	30	29.9874	0.0126	0.00015876			0.0126			59.9874
330	330	180	10	30	29.8767	0.1233	0.0152029			0.1233			59.8767
330	330	270	10	30	29.2887	0.7113	0.505948			0.7113			59.2887
30	330	330	10	0	-0.0023	0.0023	5.29e-06			0.0023			-0.0023
30	330	90	10	0	-9.7042e-06	9.7042e-06	9.41715e-11			9.7042e-06			-9.7042e-06
30	330	180	10	0	-0.000227	0.000227	5.1529e-08			0.000227			-0.000227
30	330	270	10	-60	-60.0016	0.0016	2.56e-06			0.0016			-120.002
180	330	330	10	0	-0.0732	0.0732	0.00535824			0.0732			-0.0732
180	330	90	10	0	-0.00081411	0.00081411	6.62775e-07			0.00081411			-0.00081411
180	330	180	10	0	-0.0091	0.0091	8.281e-05			0.0091			-0.0091
180	330	270	10	0	-0.0587	0.0587	0.00344569			0.0587			-0.0587
90	30	30	10	0	0.00036083	-0.00036083	1.30198e-07			0.00036083			0.00036083
90	30	90	10	0	6.7399e-06	-6.7399e-06	4.54263e-11			6.7399e-06			6.7399e-06
90	30	180	10	0	-0.00019572	0.00019572	3.83063e-08			0.00019572			-0.00019572
90	30	270	10	0	2.6089e-05	-2.6089e-05	6.80636e-10			2.6089e-05			2.6089e-05
270	30	30	10	0	-4.2651e-05	4.2651e-05	1.81911e-09			4.2651e-05			-4.2651e-05
270	30	90	10	0	-4.6568e-05	4.6568e-05	2.16858e-09			4.6568e-05			-4.6568e-05
270	30	180	10	0	-0.00037214	0.00037214	1.38488e-07			0.00037214			-0.00037214
270	30	270	10	0	-0.0029	0.0029	8.41e-06			0.0029			-0.0029
330	30	30	10	0	-3.4805e-05	3.4805e-05	1.21139e-09			3.4805e-05			-3.4805e-05
330	30	90	10	-60	-59.9999	-0.0001	1e-08			0.0001			-120
330	30	180	10	0	-0.00053401	0.00053401	2.85167e-07			0.00053401			-0.00053401
330	30	270	10	0	-0.0037	0.0037	1.369e-05			0.0037			-0.0037
30	30	30	10	30	29.9998	0.0002	4e-08			0.0002			59.9998
30	30	90	10	-30	-29.9999	-0.0001	1e-08			0.0001			-59.9999
30	30	180	10	-30	-29.9999	-0.0001	1e-08			0.0001			-59.9999
30	30	270	10	30	30	0	0			0			60
180	30	30	10	0	0.00024814	-0.00024814	6.15735e-08			0.00024814			0.00024814
180	30	90	10	0	-2.3985e-05	2.3985e-05	5.7528e-10			2.3985e-05			-2.3985e-05
180	30	180	10	0	-1.2569e-05	1.2569e-05	1.5798e-10			1.2569e-05			-1.2569e-05
180	30	270	10	0	-0.00021715	0.00021715	4.71541e-08			0.00021715			-0.00021715
90	90	330	10	30	30.0002	-0.0002	4e-08			0.0002			60.0002
90	90	30	10	30	30.0001	-0.0001	1e-08			0.0001			60.0001
90	90	180	10	-30	-29.9999	-0.0001	1e-08			0.0001			-59.9999
90	90	270	10	60	59.9999	0.0001	1e-08			0.0001			120
270	90	330	10	0	-0.0085	0.0085	7.225e-05			0.0085			-0.0085
270	90	30	10	0	8.2304e-05	-8.2304e-05	6.77395e-09			8.2304e-05			8.2304e-05
270	90	180	10	0	-0.00088241	0.00088241	7.78647e-07			0.00088241			-0.00088241
270	90	270	10	0	-0.0069	0.0069	4.761e-05			0.0069			-0.0069
330	90	330	10	0	-0.0105	0.0105	0.00011025			0.0105			-0.0105
330	90	30	10	0	5.8432e-05	-5.8432e-05	3.4143e-09			5.8432e-05			5.8432e-05
330	90	180	10	0	-0.0011	0.0011	1.21e-06			0.0011			-0.0011
330	90	270	10	0	-0.0092	0.0092	8.464e-05			0.0092			-0.0092
30	90	330	10	0	-6.6887e-05	6.6887e-05	4.47387e-09			6.6887e-05			-6.6887e-05
30	90	30	10	0	-0.00010507	0.00010507	1.10397e-08			0.00010507			-0.00010507
30	90	180	10	30	30	0	0			0			60
30	90	270	10	0	1.3125e-05	-1.3125e-05	1.72266e-10			1.3125e-05			1.3125e-05
180	90	330	10	0	-0.00067357	0.00067357	4.53697e-07			0.00067357			-0.00067357
180	90	30	10	0	1.9059e-05	-1.9059e-05	3.63245e-10			1.9059e-05			1.9059e-05
180	90	180	10	0	-3.7155e-05	3.7155e-05	1.38049e-09			3.7155e-05			-3.7155e-05
180	90	270	10	0	-0.00046388	0.00046388	2.15185e-07			0.00046388			-0.00046388
90	180	330	10	0	-0.00045729	0.00045729	2.09114e-07			0.00045729			-0.00045729
90	180	30	10	0	0.00037522	-0.00037522	1.4079e-07			0.00037522			0.00037522
90	180	90	10	0	-0.0015	0.0015	2.25e-06			0.0015			-0.0015
90	180	270	10	0	-0.00047284	0.00047284	2.23578e-07			0.00047284			-0.00047284
270	180	330	10	0	-0.115	0.115	0.013225			0.115			-0.115
270	180	30	10	0	-0.00027385	0.00027385	7.49938e-08			0.00027385			-0.00027385
270	180	90	10	0	-0.00071156	0.00071156	5.06318e-07			0.00071156			-0.00071156
270	180	270	10	0	-0.0921	0.0921	0.00848241			0.0921			-0.0921
330	180	330	10	0	-0.1398	0.1398	0.019544			0.1398			-0.1398
330	180	30	10	0	-0.00040747	0.00040747	1.66032e-07			0.00040747			-0.00040747
330	180	90	10	0	-0.001	0.001	1e-06			0.001			-0.001
330	180	270	10	0	-0.1206	0.1206	0.0145444			0.1206			-0.1206
30	180	330	10	0	-0.00012477	0.00012477	1.55676e-08			0.00012477			-0.00012477
30	180	30	10	0	0.00077223	-0.00077223	5.96339e-07			0.00077223			0.00077223
30	180	90	10	0	0.00014492	-0.00014492	2.10018e-08			0.00014492			0.00014492
30	180	270	10	0	-0.00015473	0.00015473	2.39414e-08			0.00015473			-0.00015473
180	180	330	10	-30	-30.0079	0.0079	6.241e-05			0.0079			-60.0079
180	180	30	10	30	30	0	0			0			60
180	180	90	10	30	30	0	0			0			60
180	180	270	10	-30	-30.0056	0.0056	3.136e-05			0.0056			-60.0056
90	270	330	10	0	-0.0052	0.0052	2.704e-05			0.0052			-0.0052
90	270	30	10	0	2.8904e-05	-2.8904e-05	8.35441e-10			2.8904e-05			2.8904e-05
90	270	90	10	0	0.00010257	-0.00010257	1.05206e-08			0.00010257			0.00010257
90	270	180	10	0	-0.00051174	0.00051174	2.61878e-07			0.00051174			-0.00051174
270	270	330	10	-30	-30.5267	0.5267	0.277413			0.5267			-60.5267
270	270	30	10	-30	-30.0031	0.0031	9.61e-06			0.0031			-60.0031
270	270	90	10	60	59.9932	0.0068	4.624e-05			0.0068			119.993
270	270	180	10	30	29.9287	0.0713	0.00508369			0.0713			59.9287
330	270	330	10	0	-0.6614	0.6614	0.43745			0.6614			-0.6614
330	270	30	10	0	-0.0042	0.0042	1.764e-05			0.0042			-0.0042
330	270	90	10	0	-0.0091	0.0091	8.281e-05			0.0091			-0.0091
330	270	180	10	-30	-30.0928	0.0928	0.00861184			0.0928			-60.0928
30	270	330	10	0	-0.0014	0.0014	1.96e-06			0.0014			-0.0014
30	270	30	10	0	-1.5956e-05	1.5956e-05	2.54594e-10			1.5956e-05			-1.5956e-05
30	270	90	10	0	-3.8109e-05	3.8109e-05	1.4523e-09			3.8109e-05			-3.8109e-05
30	270	180	10	0	-0.00014735	0.00014735	2.1712e-08			0.00014735			-0.00014735
180	270	330	10	0	0.0552	-0.0552	0.00304704			0.0552			0.0552
180	270	30	10	0	-0.00023546	0.00023546	5.54414e-08			0.00023546			-0.00023546
180	270	90	10	0	-0.0005503	0.0005503	3.0283e-07			0.0005503			-0.0005503
180	270	180	10	0	-0.0065	0.0065	4.225e-05			0.0065			-0.0065
90	30	330	15	60	60	0	0			0			120
270	330	30	15	60	59.9958	0.0042	1.764e-05			0.0042			119.996
330	90	90	15	-60	-60	0	0			0			-120
30	180	180	15	0	-9.9248e-06	9.9248e-06	9.85017e-11			9.9248e-06			-9.9248e-06
180	270	270	15	0	-0.0438	0.0438	0.00191844			0.0438			-0.0438
90	330	30	15	0	1.7124e-05	-1.7124e-05	2.93231e-10			1.7124e-05			1.7124e-05
90	90	90	15	0	0.00010718	-0.00010718	1.14876e-08			0.00010718			0.00010718
90	180	180	15	0	-4.1617e-05	4.1617e-05	1.73197e-09			4.1617e-05			-4.1617e-05
90	270	270	15	0	-0.0028	0.0028	7.84e-06			0.0028			-0.0028
270	30	330	15	0	-0.0035	0.0035	1.225e-05			0.0035			-0.0035
270	90	90	15	0	-6.7152e-05	6.7152e-05	4.50939e-09			6.7152e-05			-6.7152e-05
270	180	180	15	0	-0.0096	0.0096	9.216e-05			0.0096			-0.0096
270	270	270	15	0	-0.4747	0.4747	0.22534			0.4747			-0.4747
330	30	330	15	0	-0.0046	0.0046	2.116e-05			0.0046			-0.0046
330	330	30	15	0	-0.0056	0.0056	3.136e-05			0.0056			-0.0056
330	180	180	15	0	-0.0133	0.0133	0.00017689			0.0133			-0.0133
330	270	270	15	0	-0.5764	0.5764	0.332237			0.5764			-0.5764
30	30	330	15	0	-6.9589e-06	6.9589e-06	4.84263e-11			6.9589e-06			-6.9589e-06
30	330	30	15	0	-1.3356e-06	1.3356e-06	1.78383e-12			1.3356e-06			-1.3356e-06
30	90	90	15	0	3.4248e-05	-3.4248e-05	1.17293e-09			3.4248e-05			3.4248e-05
30	270	270	15	0	-0.0011	0.0011	1.21e-06			0.0011			-0.0011
180	30	330	15	0	-0.00024956	0.00024956	6.22802e-08			0.00024956			-0.00024956
180	330	30	15	0	-0.00034287	0.00034287	1.1756e-07			0.00034287			-0.00034287
180	90	90	15	0	5.9935e-05	-5.9935e-05	3.5922e-09			5.9935e-05			5.9935e-05
180	180	180	15	0	-0.00066716	0.00066716	4.45102e-07			0.00066716			-0.00066716
90	330	330	15	0	-0.0049	0.0049	2.401e-05			0.0049			-0.0049
90	330	90	15	0	1.4515e-05	-1.4515e-05	2.10685e-10			1.4515e-05			1.4515e-05
90	330	180	15	0	-0.00052755	0.00052755	2.78309e-07			0.00052755			-0.00052755
90	330	270	15	0	-0.0038	0.0038	1.444e-05			0.0038			-0.0038
270	330	330	15	0	-0.8081	0.8081	0.653026			0.8081			-0.8081
270	330	90	15	0	-0.0092	0.0092	8.464e-05			0.0092			-0.0092
270	330	180	15	0	-0.0921	0.0921	0.00848241			0.0921			-0.0921
270	330	270	15	0	-0.6383	0.6383	0.407427			0.6383			-0.6383
330	330	330	15	0	-0.9127	0.9127	0.833021			0.9127			-0.9127
330	330	90	15	0	-0.012	0.012	0.000144			0.012			-0.012
330	330	180	15	0	-0.1263	0.1263	0.0159517			0.1263			-0.1263
330	330	270	15	30	29.2123	0.7877	0.620471			0.7877			59.2123
30	330	330	15	0	-0.0021	0.0021	4.41e-06			0.0021			-0.0021
30	330	90	15	0	-3.1355e-05	3.1355e-05	9.83136e-10			3.1355e-05			-3.1355e-05
30	330	180	15	0	-0.00021407	0.00021407	4.5826e-08			0.00021407			-0.00021407
30	330	270	15	0	-0.0016	0.0016	2.56e-06			0.0016			-0.0016
180	330	330	15	60	59.925	0.075	0.005625			0.075			119.925
180	330	90	15	0	-0.0007864	0.0007864	6.18425e-07			0.0007864			-0.0007864
180	330	180	15	0	-0.009	0.009	8.1e-05			0.009			-0.009
180	330	270	15	0	-0.0563	0.0563	0.00316969			0.0563			-0.0563
90	30	30	15	0	5.6093e-05	-5.6093e-05	3.14642e-09			5.6093e-05			5.6093e-05
90	30	90	15	0	-0.00022182	0.00022182	4.92041e-08			0.00022182			-0.00022182
90	30	180	15	0	5.9304e-05	-5.9304e-05	3.51696e-09			5.9304e-05			5.9304e-05
90	30	270	15	0	-1.4371e-05	1.4371e-05	2.06526e-10			1.4371e-05			-1.4371e-05
270	30	30	15	0	-2.5081e-06	2.5081e-06	6.29057e-12			2.5081e-06			-2.5081e-06
270	30	90	15	0	-1.3547e-05	1.3547e-05	1.83521e-10			1.3547e-05			-1.3547e-05
270	30	180	15	0	-0.00032283	0.00032283	1.04219e-07			0.00032283			-0.00032283
270	30	270	15	0	-0.0026	0.0026	6.76e-06			0.0026			-0.0026
330	30	30	15	0	-5.7623e-06	5.7623e-06	3.32041e-11			5.7623e-06			-5.7623e-06
330	30	90	15	0	-5.5751e-05	5.5751e-05	3.10817e-09			5.5751e-05			-5.5751e-05
330	30	180	15	360	360	0.0005	2.5e-07			0.0005			720
330	30	270	15	0	-0.0037	0.0037	1.369e-05			0.0037			-0.0037
30	30	30	15	0	-4.4451e-05	4.4451e-05	1.97589e-09			4.4451e-05			-4.4451e-05
30	30	90	15	0	4.1689e-05	-4.1689e-05	1.73797e-09			4.1689e-05			4.1689e-05
30	30	180	15	0	-1.098e-05	1.098e-05	1.2056e-10			1.098e-05			-1.098e-05
30	30	270	15	-30	-30	0	0			0			-60
180	30	30	15	0	-7.2762e-05	7.2762e-05	5.29431e-09			7.2762e-05			-7.2762e-05
180	30	90	15	0	7.8573e-06	-7.8573e-06	6.17372e-11			7.8573e-06			7.8573e-06
180	30	180	15	0	-1.9288e-05	1.9288e-05	3.72027e-10			1.9288e-05			-1.9288e-05
180	30	270	15	0	-0.00017735	0.00017735	3.1453e-08			0.00017735			-0.00017735
90	90	330	15	0	-6.975e-05	6.975e-05	4.86506e-09			6.975e-05			-6.975e-05
90	90	30	15	0	-8.1683e-05	8.1683e-05	6.67211e-09			8.1683e-05			-8.1683e-05
90	90	180	15	0	-1.6036e-05	1.6036e-05	2.57153e-10			1.6036e-05			-1.6036e-05
90	90	270	15	0	-6.036e-07	6.036e-07	3.64333e-13			6.036e-07			-6.036e-07
270	90	330	15	60	59.9919	0.0081	6.561e-05			0.0081			119.992
270	90	30	15	0	-4.1519e-05	4.1519e-05	1.72383e-09			4.1519e-05			-4.1519e-05
270	90	180	15	0	-0.00070135	0.00070135	4.91892e-07			0.00070135			-0.00070135
270	90	270	15	0	-0.0071	0.0071	5.041e-05			0.0071			-0.0071
330	90	330	15	0	-0.0102	0.0102	0.00010404			0.0102			-0.0102
330	90	30	15	0	-4.5103e-05	4.5103e-05	2.03428e-09			4.5103e-05			-4.5103e-05
330	90	180	15	0	-0.001	0.001	1e-06			0.001			-0.001
330	90	270	15	0	-0.0036	0.0036	1.296e-05			0.0036			-0.0036
30	90	330	15	0	1.8636e-06	-1.8636e-06	3.473e-12			1.8636e-06			1.8636e-06
30	90	30	15	0	-6.8919e-05	6.8919e-05	4.74983e-09			6.8919e-05			-6.8919e-05
30	90	180	15	0	2.5291e-07	-2.5291e-07	6.39635e-14			2.5291e-07			2.5291e-07
30	90	270	15	360	360	0	0			0			720
180	90	330	15	0	-0.00055155	0.00055155	3.04207e-07			0.00055155			-0.00055155
180	90	30	15	0	-3.038e-06	3.038e-06	9.22944e-12			3.038e-06			-3.038e-06
180	90	180	15	-30	-30	0	0			0			-60
180	90	270	15	0	-0.00040868	0.00040868	1.67019e-07			0.00040868			-0.00040868
90	180	330	15	0	-0.00040126	0.00040126	1.6101e-07			0.00040126			-0.00040126
90	180	30	15	0	-7.193e-05	7.193e-05	5.17392e-09			7.193e-05			-7.193e-05
90	180	90	15	0	0.00041796	-0.00041796	1.74691e-07			0.00041796			0.00041796
90	180	270	15	0	-0.00026734	0.00026734	7.14707e-08			0.00026734			-0.00026734
270	180	330	15	0	-0.1	0.1	0.01			0.1			-0.1
270	180	30	15	0	-0.00025825	0.00025825	6.66931e-08			0.00025825			-0.00025825
270	180	90	15	0	-0.00067117	0.00067117	4.50469e-07			0.00067117			-0.00067117
270	180	270	15	0	-0.0802	0.0802	0.00643204			0.0802			-0.0802
330	180	330	15	0	-0.1307	0.1307	0.0170825			0.1307			-0.1307
330	180	30	15	0	-0.00038792	0.00038792	1.50482e-07			0.00038792			-0.00038792
330	180	90	15	0	-0.00098135	0.00098135	9.63048e-07			0.00098135			-0.00098135
330	180	270	15	0	-0.1039	0.1039	0.0107952			0.1039			-0.1039
30	180	330	15	0	-0.00019756	0.00019756	3.903e-08			0.00019756			-0.00019756
30	180	30	15	0	-0.00021728	0.00021728	4.72106e-08			0.00021728			-0.00021728
30	180	90	15	0	-3.0912e-05	3.0912e-05	9.55552e-10			3.0912e-05			-3.0912e-05
30	180	270	15	0	-0.00011049	0.00011049	1.2208e-08			0.00011049			-0.00011049
180	180	330	15	0	-0.0074	0.0074	5.476e-05			0.0074			-0.0074
180	180	30	15	-30	-30	0	0			0			-60
180	180	90	15	30	29.9999	0.0001	1e-08			0.0001			59.9999
180	180	270	15	0	-0.0056	0.0056	3.136e-05			0.0056			-0.0056
90	270	330	15	0	-0.0033	0.0033	1.089e-05			0.0033			-0.0033
90	270	30	15	0	9.1824e-05	-9.1824e-05	8.43165e-09			9.1824e-05			9.1824e-05
90	270	90	15	0	-0.0003242	0.0003242	1.05106e-07			0.0003242			-0.0003242
90	270	180	15	0	-0.00037094	0.00037094	1.37596e-07			0.00037094			-0.00037094
270	270	330	15	0	-0.5778	0.5778	0.333853			0.5778			-0.5778
270	270	30	15	0	-0.0029	0.0029	8.41e-06			0.0029			-0.0029
270	270	90	15	0	-0.0065	0.0065	4.225e-05			0.0065			-0.0065
270	270	180	15	60	59.9275	0.0725	0.00525625			0.0725			119.928
330	270	330	15	0	-0.6882	0.6882	0.473619			0.6882			-0.6882
330	270	30	15	0	-0.004	0.004	1.6e-05			0.004			-0.004
330	270	90	15	0	-0.0088	0.0088	7.744e-05			0.0088			-0.0088
330	270	180	15	0	-0.0946	0.0946	0.00894916			0.0946			-0.0946
30	270	330	15	360	359.998	0.0016	2.56e-06			0.0016			719.998
30	270	30	15	0	-2.4028e-05	2.4028e-05	5.77345e-10			2.4028e-05			-2.4028e-05
30	270	90	15	0	7.9182e-05	-7.9182e-05	6.26979e-09			7.9182e-05			7.9182e-05
30	270	180	15	0	-0.00015322	0.00015322	2.34764e-08			0.00015322			-0.00015322
180	270	330	15	0	-0.0561	0.0561	0.00314721			0.0561			-0.0561
180	270	30	15	30	29.9998	0.0002	4e-08			0.0002			59.9998
180	270	90	15	0	-0.00052749	0.00052749	2.78246e-07			0.00052749			-0.00052749
180	270	180	15	0	-0.0065	0.0065	4.225e-05			0.0065			-0.0065
90	30	330	25	360	360	0	0			0			720
270	330	30	25	360	360	0.0002	4e-08			0.0002			720
330	90	90	25	0	-1.804e-06	1.804e-06	3.25442e-12			1.804e-06			-1.804e-06
30	180	180	25	0	-3.2554e-07	3.2554e-07	1.05976e-13			3.2554e-07			-3.2554e-07
180	270	270	25	0	-0.0017	0.0017	2.89e-06			0.0017			-0.0017
90	330	30	25	0	-6.7172e-07	6.7172e-07	4.51208e-13			6.7172e-07			-6.7172e-07
90	90	90	25	0	7.7557e-07	-7.7557e-07	6.01509e-13			7.7557e-07			7.7557e-07
90	180	180	25	0	-9.044e-07	9.044e-07	8.17939e-13			9.044e-07			-9.044e-07
90	270	270	25	0	-9.2769e-05	9.2769e-05	8.60609e-09			9.2769e-05			-9.2769e-05
270	30	330	25	0	-6.3125e-05	6.3125e-05	3.98477e-09			6.3125e-05			-6.3125e-05
270	90	90	25	0	-1.1021e-06	1.1021e-06	1.21462e-12			1.1021e-06			-1.1021e-06
270	180	180	25	0	-0.00027613	0.00027613	7.62478e-08			0.00027613			-0.00027613
270	270	270	25	0	-0.016	0.016	0.000256			0.016			-0.016
330	30	330	25	0	-8.6064e-05	8.6064e-05	7.40701e-09			8.6064e-05			-8.6064e-05
330	330	30	25	0	-0.00023819	0.00023819	5.67345e-08			0.00023819			-0.00023819
330	180	180	25	0	-0.00038724	0.00038724	1.49955e-07			0.00038724			-0.00038724
330	270	270	25	0	-0.0205	0.0205	0.00042025			0.0205			-0.0205
30	30	330	25	0	-5.4414e-08	5.4414e-08	2.96088e-15			5.4414e-08			-5.4414e-08
30	330	30	25	0	-2.296e-07	2.296e-07	5.27162e-14			2.296e-07			-2.296e-07
30	90	90	25	0	-1.0321e-05	1.0321e-05	1.06523e-10			1.0321e-05			-1.0321e-05
30	270	270	25	0	-3.8487e-05	3.8487e-05	1.48125e-09			3.8487e-05			-3.8487e-05
180	30	330	25	0	-5.038e-06	5.038e-06	2.53814e-11			5.038e-06			-5.038e-06
180	330	30	25	0	-1.4675e-05	1.4675e-05	2.15356e-10			1.4675e-05			-1.4675e-05
180	90	90	25	0	-1.3772e-07	1.3772e-07	1.89668e-14			1.3772e-07			-1.3772e-07
180	180	180	25	0	-2.1763e-05	2.1763e-05	4.73628e-10			2.1763e-05			-2.1763e-05
90	330	330	25	0	-0.00016416	0.00016416	2.69485e-08			0.00016416			-0.00016416
90	330	90	25	0	-1.5906e-06	1.5906e-06	2.53001e-12			1.5906e-06			-1.5906e-06
90	330	180	25	0	-1.892e-05	1.892e-05	3.57966e-10			1.892e-05			-1.892e-05
90	330	270	25	30	29.999	0.001	1e-06			0.001			59.999
270	330	330	25	0	-0.0253	0.0253	0.00064009			0.0253			-0.0253
270	330	90	25	30	29.9996	0.0004	1.6e-07			0.0004			59.9996
270	330	180	25	0	-0.0037	0.0037	1.369e-05			0.0037			-0.0037
270	330	270	25	0	-0.0205	0.0205	0.00042025			0.0205			-0.0205
330	330	330	25	0	-0.0317	0.0317	0.00100489			0.0317			-0.0317
330	330	90	25	0	-0.00049347	0.00049347	2.43513e-07			0.00049347			-0.00049347
330	330	180	25	30	29.9952	0.0048	2.304e-05			0.0048			59.9952
330	330	270	25	0	-0.0261	0.0261	0.00068121			0.0261			-0.0261
30	330	330	25	0	-6.9352e-05	6.9352e-05	4.8097e-09			6.9352e-05			-6.9352e-05
30	330	90	25	0	-5.4553e-07	5.4553e-07	2.97603e-13			5.4553e-07			-5.4553e-07
30	330	180	25	0	-7.3959e-06	7.3959e-06	5.46993e-11			7.3959e-06			-7.3959e-06
30	330	270	25	360	360	0.0001	1e-08			0.0001			720
180	330	330	25	0	-0.0028	0.0028	7.84e-06			0.0028			-0.0028
180	330	90	25	0	-3.2708e-05	3.2708e-05	1.06981e-09			3.2708e-05			-3.2708e-05
180	330	180	25	0	-0.00036263	0.00036263	1.31501e-07			0.00036263			-0.00036263
180	330	270	25	0	-0.0022	0.0022	4.84e-06			0.0022			-0.0022
90	30	30	25	0	-2.3423e-06	2.3423e-06	5.48637e-12			2.3423e-06			-2.3423e-06
90	30	90	25	0	3.3216e-06	-3.3216e-06	1.1033e-11			3.3216e-06			3.3216e-06
90	30	180	25	0	-2.3789e-07	2.3789e-07	5.65917e-14			2.3789e-07			-2.3789e-07
90	30	270	25	-30	-30	0	0			0			-60
270	30	30	25	0	-1.4698e-07	1.4698e-07	2.16031e-14			1.4698e-07			-1.4698e-07
270	30	90	25	-30	-30	0	0			0			-60
270	30	180	25	0	-6.302e-06	6.302e-06	3.97152e-11			6.302e-06			-6.302e-06
270	30	270	25	0	-4.7479e-05	4.7479e-05	2.25426e-09			4.7479e-05			-4.7479e-05
330	30	30	25	0	-2.9915e-07	2.9915e-07	8.94907e-14			2.9915e-07			-2.9915e-07
330	30	90	25	360	360	0	0			0			720
330	30	180	25	0	-9.9769e-06	9.9769e-06	9.95385e-11			9.9769e-06			-9.9769e-06
330	30	270	25	0	-6.6647e-05	6.6647e-05	4.44182e-09			6.6647e-05			-6.6647e-05
30	30	30	25	0	-5.3708e-05	5.3708e-05	2.88455e-09			5.3708e-05			-5.3708e-05
30	30	90	25	0	1.6663e-05	-1.6663e-05	2.77656e-10			1.6663e-05			1.6663e-05
30	30	180	25	-30	-30	0	0			0			-60
30	30	270	25	0	-5.9095e-08	5.9095e-08	3.49222e-15			5.9095e-08			-5.9095e-08
180	30	30	25	0	1.4689e-07	-1.4689e-07	2.15767e-14			1.4689e-07			1.4689e-07
180	30	90	25	0	-1.0739e-07	1.0739e-07	1.15326e-14			1.0739e-07			-1.0739e-07
180	30	180	25	0	-3.6641e-07	3.6641e-07	1.34256e-13			3.6641e-07			-3.6641e-07
180	30	270	25	0	-3.5694e-06	3.5694e-06	1.27406e-11			3.5694e-06			-3.5694e-06
90	90	330	25	0	-5.0492e-07	5.0492e-07	2.54944e-13			5.0492e-07			-5.0492e-07
90	90	30	25	0	-1.7044e-06	1.7044e-06	2.90498e-12			1.7044e-06			-1.7044e-06
90	90	180	25	0	-2.8897e-08	2.8897e-08	8.35037e-16			2.8897e-08			-2.8897e-08
90	90	270	25	60	60	0	0			0			120
270	90	330	25	0	-0.00014452	0.00014452	2.0886e-08			0.00014452			-0.00014452
270	90	30	25	0	-4.1982e-07	4.1982e-07	1.76249e-13			4.1982e-07			-4.1982e-07
270	90	180	25	0	-1.508e-05	1.508e-05	2.27406e-10			1.508e-05			-1.508e-05
270	90	270	25	0	-0.00010849	0.00010849	1.17701e-08			0.00010849			-0.00010849
330	90	330	25	0	-0.00019476	0.00019476	3.79315e-08			0.00019476			-0.00019476
330	90	30	25	0	-7.0414e-07	7.0414e-07	4.95813e-13			7.0414e-07			-7.0414e-07
330	90	180	25	0	-2.2325e-05	2.2325e-05	4.98406e-10			2.2325e-05			-2.2325e-05
330	90	270	25	0	-0.00015203	0.00015203	2.31131e-08			0.00015203			-0.00015203
30	90	330	25	0	-2.2285e-07	2.2285e-07	4.96621e-14			2.2285e-07			-2.2285e-07
30	90	30	25	0	2.0765e-05	-2.0765e-05	4.31185e-10			2.0765e-05			2.0765e-05
30	90	180	25	360	360	0	0			0			720
30	90	270	25	0	-1.4543e-07	1.4543e-07	2.11499e-14			1.4543e-07			-1.4543e-07
180	90	330	25	0	-1.2283e-05	1.2283e-05	1.50872e-10			1.2283e-05			-1.2283e-05
180	90	30	25	360	360	0	0			0			720
180	90	180	25	0	-1.0036e-06	1.0036e-06	1.00721e-12			1.0036e-06			-1.0036e-06
180	90	270	25	0	-8.826e-06	8.826e-06	7.78983e-11			8.826e-06			-8.826e-06
90	180	330	25	0	-1.1205e-05	1.1205e-05	1.25552e-10			1.1205e-05			-1.1205e-05
90	180	30	25	0	1.1858e-07	-1.1858e-07	1.40612e-14			1.1858e-07			1.1858e-07
90	180	90	25	0	-4.5311e-07	4.5311e-07	2.05309e-13			4.5311e-07			-4.5311e-07
90	180	270	25	0	-8.0671e-06	8.0671e-06	6.50781e-11			8.0671e-06			-8.0671e-06
270	180	330	25	0	-0.0023	0.0023	5.29e-06			0.0023			-0.0023
270	180	30	25	0	-1.0005e-05	1.0005e-05	1.001e-10			1.0005e-05			-1.0005e-05
270	180	90	25	0	-2.3236e-05	2.3236e-05	5.39912e-10			2.3236e-05			-2.3236e-05
270	180	270	25	0	-0.0018	0.0018	3.24e-06			0.0018			-0.0018
330	180	330	25	0	-0.0031	0.0031	9.61e-06			0.0031			-0.0031
330	180	30	25	0	-1.5129e-05	1.5129e-05	2.28887e-10			1.5129e-05			-1.5129e-05
330	180	90	25	0	-3.4239e-05	3.4239e-05	1.17231e-09			3.4239e-05			-3.4239e-05
330	180	270	25	0	-0.0024	0.0024	5.76e-06			0.0024			-0.0024
30	180	330	25	0	-4.3692e-06	4.3692e-06	1.90899e-11			4.3692e-06			-4.3692e-06
30	180	30	25	0	-2.5175e-07	2.5175e-07	6.33781e-14			2.5175e-07			-2.5175e-07
30	180	90	25	0	2.6607e-07	-2.6607e-07	7.07932e-14			2.6607e-07			2.6607e-07
30	180	270	25	0	-3.0604e-06	3.0604e-06	9.36605e-12			3.0604e-06			-3.0604e-06
180	180	330	25	-30	-30.0002	0.0002	4e-08			0.0002			-60.0002
180	180	30	25	30	30	0	0			0			60
180	180	90	25	0	-1.5606e-06	1.5606e-06	2.43547e-12			1.5606e-06			-1.5606e-06
180	180	270	25	0	-0.000165	0.000165	2.7225e-08			0.000165			-0.000165
90	270	330	25	0	-0.00012276	0.00012276	1.507e-08			0.00012276			-0.00012276
90	270	30	25	0	-4.8516e-07	4.8516e-07	2.3538e-13			4.8516e-07			-4.8516e-07
90	270	90	25	0	-5.7748e-07	5.7748e-07	3.33483e-13			5.7748e-07			-5.7748e-07
90	270	180	25	0	-1.2911e-05	1.2911e-05	1.66694e-10			1.2911e-05			-1.2911e-05
270	270	330	25	0	-0.0198	0.0198	0.00039204			0.0198			-0.0198
270	270	30	25	0	-0.00012444	0.00012444	1.54853e-08			0.00012444			-0.00012444
270	270	90	25	60	59.9997	0.0003	9e-08			0.0003			120
270	270	180	25	0	-0.0028	0.0028	7.84e-06			0.0028			-0.0028
330	270	330	25	0	-0.0251	0.0251	0.00063001			0.0251			-0.0251
330	270	30	25	0	-0.00017441	0.00017441	3.04188e-08			0.00017441			-0.00017441
330	270	90	25	0	-0.00036684	0.00036684	1.34572e-07			0.00036684			-0.00036684
330	270	180	25	360	359.996	0.0037	1.369e-05			0.0037			719.996
30	270	330	25	0	-5.3204e-05	5.3204e-05	2.83067e-09			5.3204e-05			-5.3204e-05
30	270	30	25	0	-1.0034e-07	1.0034e-07	1.00681e-14			1.0034e-07			-1.0034e-07
30	270	90	25	0	-4.2473e-07	4.2473e-07	1.80396e-13			4.2473e-07			-4.2473e-07
30	270	180	25	0	-4.9229e-06	4.9229e-06	2.42349e-11			4.9229e-06			-4.9229e-06
180	270	330	25	360	359.998	0.0021	4.41e-06			0.0021			719.998
180	270	30	25	0	-9.6923e-06	9.6923e-06	9.39407e-11			9.6923e-06			-9.6923e-06
180	270	90	25	0	-2.2198e-05	2.2198e-05	4.92751e-10			2.2198e-05			-2.2198e-05
180	270	180	25	0	-0.00025829	0.00025829	6.67137e-08			0.00025829			-0.00025829
