# Supplementary material for: The Neural-Fuzzy Approach as a Way of Preventing a Maritime Vessel Accident in a Heavy Traffic Zone
Source: Hindawi journal article supplement (doi:10.1155/2018/2367096), 2018-08-15
Supplement: f9 [file 2367096.f9.xlsx]

## Sheet: Лист1
1 input LV	2 input LV	3 input LV	4 input LV	Known value LV output	out	(output-out)	G1^2	sum	RMSE	|output-out|	sum	MAE	output+out	sum	SMAPE
90	330	0	0	0	-4.2117e-06	4.2117e-06	1.77384e-11	78.4246	0.386497	4.2117e-06	26.4928	0.0504625	-4.2117e-06	9757.18	0.00271521
270	330	0	0	0	-0.0013	0.0013	1.69e-06			0.0013			-0.0013
330	330	0	0	30	29.9983	0.0017	2.89e-06			0.0017			59.9983
30	330	0	0	0	-1.1596e-06	1.1596e-06	1.34467e-12			1.1596e-06			-1.1596e-06
180	330	0	0	0	-0.00010034	0.00010034	1.00681e-08			0.00010034			-0.00010034
90	30	0	0	0	4.1931e-05	-4.1931e-05	1.75821e-09			4.1931e-05			4.1931e-05
270	30	0	0	0	-5.2464e-07	5.2464e-07	2.75247e-13			5.2464e-07			-5.2464e-07
330	30	0	0	0	-1.422e-06	1.422e-06	2.02208e-12			1.422e-06			-1.422e-06
30	30	0	0	30	30.0002	-0.0002	4e-08			0.0002			60.0002
180	30	0	0	0	-1.6006e-06	1.6006e-06	2.56192e-12			1.6006e-06			-1.6006e-06
90	90	0	0	30	29.9999	0.0001	1e-08			0.0001			59.9999
270	90	0	0	0	-2.6985e-06	2.6985e-06	7.2819e-12			2.6985e-06			-2.6985e-06
330	90	0	0	0	-4.0071e-06	4.0071e-06	1.60569e-11			4.0071e-06			-4.0071e-06
30	90	0	0	0	-1.632e-05	1.632e-05	2.66342e-10			1.632e-05			-1.632e-05
180	90	0	0	0	2.1469e-06	-2.1469e-06	4.60918e-12			2.1469e-06			2.1469e-06
90	180	0	0	0	5.7487e-06	-5.7487e-06	3.30476e-11			5.7487e-06			5.7487e-06
270	180	0	0	0	-6.5396e-05	6.5396e-05	4.27664e-09			6.5396e-05			-6.5396e-05
330	180	0	0	0	-0.00010003	0.00010003	1.0006e-08			0.00010003			-0.00010003
30	180	0	0	0	-4.9185e-06	4.9185e-06	2.41916e-11			4.9185e-06			-4.9185e-06
180	180	0	0	30	30	0	0			0			60
90	270	0	0	0	-2.4347e-06	2.4347e-06	5.92776e-12			2.4347e-06			-2.4347e-06
270	270	0	0	30	29.9991	0.0009	8.1e-07			0.0009			59.9991
330	270	0	0	0	-0.0013	0.0013	1.69e-06			0.0013			-0.0013
30	270	0	0	0	-8.9413e-07	8.9413e-07	7.99468e-13			8.9413e-07			-8.9413e-07
180	270	0	0	0	-6.5548e-05	6.5548e-05	4.29654e-09			6.5548e-05			-6.5548e-05
90	30	330	5	-30	-30	0	0			0			-60
270	330	30	5	0	-0.0039	0.0039	1.521e-05			0.0039			-0.0039
330	90	90	5	0	-3.6192e-05	3.6192e-05	1.30986e-09			3.6192e-05			-3.6192e-05
30	180	180	5	0	-5.9562e-06	5.9562e-06	3.54763e-11			5.9562e-06			-5.9562e-06
180	270	270	5	0	-0.0402	0.0402	0.00161604			0.0402			-0.0402
90	330	30	5	0	-1.3311e-05	1.3311e-05	1.77183e-10			1.3311e-05			-1.3311e-05
90	90	90	5	30	29.9999	0.0001	1e-08			0.0001			59.9999
90	180	180	5	0	-2.2779e-05	2.2779e-05	5.18883e-10			2.2779e-05			-2.2779e-05
90	270	270	5	0	-0.0022	0.0022	4.84e-06			0.0022			-0.0022
270	30	330	5	0	-0.0012	0.0012	1.44e-06			0.0012			-0.0012
270	90	90	5	0	-2.4502e-05	2.4502e-05	6.00348e-10			2.4502e-05			-2.4502e-05
270	180	180	5	0	-0.0063	0.0063	3.969e-05			0.0063			-0.0063
270	270	270	5	30	29.6186	0.3814	0.145466			0.3814			59.6186
330	30	330	5	0	-0.0016	0.0016	2.56e-06			0.0016			-0.0016
330	330	30	5	0	-0.0052	0.0052	2.704e-05			0.0052			-0.0052
330	180	180	5	0	-0.0088	0.0088	7.744e-05			0.0088			-0.0088
330	270	270	5	0	-0.4911	0.4911	0.241179			0.4911			-0.4911
30	30	330	5	0	6.7536e-06	-6.7536e-06	4.56111e-11			6.7536e-06			6.7536e-06
30	330	30	5	0	-5.7034e-06	5.7034e-06	3.25288e-11			5.7034e-06			-5.7034e-06
30	90	90	5	0	-0.0002203	0.0002203	4.85321e-08			0.0002203			-0.0002203
30	270	270	5	0	-0.00090469	0.00090469	8.18464e-07			0.00090469			-0.00090469
180	30	330	5	0	-9.6953e-05	9.6953e-05	9.39988e-09			9.6953e-05			-9.6953e-05
180	330	30	5	0	-0.00032185	0.00032185	1.03587e-07			0.00032185			-0.00032185
180	90	90	5	0	4.9374e-06	-4.9374e-06	2.43779e-11			4.9374e-06			4.9374e-06
180	180	180	5	30	29.9995	0.0005	2.5e-07			0.0005			59.9995
90	330	330	5	0	-0.0039	0.0039	1.521e-05			0.0039			-0.0039
90	330	90	5	0	-3.7224e-05	3.7224e-05	1.38563e-09			3.7224e-05			-3.7224e-05
90	330	180	5	0	-0.00045734	0.00045734	2.0916e-07			0.00045734			-0.00045734
90	330	270	5	0	0.0031	-0.0031	9.61e-06			0.0031			0.0031
270	330	330	5	0	-0.6016	0.6016	0.361923			0.6016			-0.6016
270	330	90	5	0	-0.0088	0.0088	7.744e-05			0.0088			-0.0088
270	330	180	5	0	-0.0889	0.0889	0.00790321			0.0889			-0.0889
270	330	270	5	0	-0.491	0.491	0.241081			0.491			-0.491
330	330	330	5	30	29.2439	0.7561	0.571687			0.7561			59.2439
330	330	90	5	30	29.9882	0.0118	0.00013924			0.0118			59.9882
330	330	180	5	30	29.8835	0.1165	0.0135722			0.1165			59.8835
330	330	270	5	30	29.3763	0.6237	0.389002			0.6237			59.3763
30	330	330	5	0	-0.0016	0.0016	2.56e-06			0.0016			-0.0016
30	330	90	5	0	-1.2377e-05	1.2377e-05	1.5319e-10			1.2377e-05			-1.2377e-05
30	330	180	5	0	-0.00017766	0.00017766	3.15631e-08			0.00017766			-0.00017766
30	330	270	5	-30	-30.0013	0.0013	1.69e-06			0.0013			-60.0013
180	330	330	5	0	-0.0676	0.0676	0.00456976			0.0676			-0.0676
180	330	90	5	0	-0.00078407	0.00078407	6.14766e-07			0.00078407			-0.00078407
180	330	180	5	0	-0.0088	0.0088	7.744e-05			0.0088			-0.0088
180	330	270	5	0	-0.0538	0.0538	0.00289444			0.0538			-0.0538
90	30	30	5	0	-0.00020306	0.00020306	4.12334e-08			0.00020306			-0.00020306
90	30	90	5	0	-0.00016072	0.00016072	2.58309e-08			0.00016072			-0.00016072
90	30	180	5	0	5.7917e-07	-5.7917e-07	3.35438e-13			5.7917e-07			5.7917e-07
90	30	270	5	0	1.0989e-05	-1.0989e-05	1.20758e-10			1.0989e-05			1.0989e-05
270	30	30	5	0	-4.2912e-06	4.2912e-06	1.84144e-11			4.2912e-06			-4.2912e-06
270	30	90	5	0	-7.0181e-06	7.0181e-06	4.92537e-11			7.0181e-06			-7.0181e-06
270	30	180	5	0	-0.00011736	0.00011736	1.37734e-08			0.00011736			-0.00011736
270	30	270	5	0	-0.00088645	0.00088645	7.85794e-07			0.00088645			-0.00088645
330	30	30	5	0	-4.0875e-06	4.0875e-06	1.67077e-11			4.0875e-06			-4.0875e-06
330	30	90	5	-60	-60	0	0			0			-120
330	30	180	5	0	-0.00017868	0.00017868	3.19265e-08			0.00017868			-0.00017868
330	30	270	5	0	-0.0012	0.0012	1.44e-06			0.0012			-0.0012
30	30	30	5	30	29.9998	0.0002	4e-08			0.0002			59.9998
30	30	90	5	-30	-29.9992	-0.0008	6.4e-07			0.0008			-59.9992
30	30	180	5	-30	-30	0	0			0			-60
30	30	270	5	30	30	0	0			0			60
180	30	30	5	0	7.5024e-06	-7.5024e-06	5.6286e-11			7.5024e-06			7.5024e-06
180	30	90	5	0	-1.8167e-07	1.8167e-07	3.3004e-14			1.8167e-07			-1.8167e-07
180	30	180	5	0	-6.9709e-06	6.9709e-06	4.85934e-11			6.9709e-06			-6.9709e-06
180	30	270	5	0	-6.922e-05	6.922e-05	4.79141e-09			6.922e-05			-6.922e-05
90	90	330	5	30	30	0	0			0			60
90	90	30	5	30	30.0004	-0.0004	1.6e-07			0.0004			60.0004
90	90	180	5	-30	-30	0	0			0			-60
90	90	270	5	60	60	0	0			0			120
270	90	330	5	0	-0.0029	0.0029	8.41e-06			0.0029			-0.0029
270	90	30	5	0	-7.0391e-06	7.0391e-06	4.95489e-11			7.0391e-06			-7.0391e-06
270	90	180	5	0	-0.00030996	0.00030996	9.60752e-08			0.00030996			-0.00030996
270	90	270	5	0	-0.0022	0.0022	4.84e-06			0.0022			-0.0022
330	90	330	5	0	-0.0039	0.0039	1.521e-05			0.0039			-0.0039
330	90	30	5	0	-1.4679e-05	1.4679e-05	2.15473e-10			1.4679e-05			-1.4679e-05
330	90	180	5	0	-0.00045723	0.00045723	2.09059e-07			0.00045723			-0.00045723
330	90	270	5	0	-0.003	0.003	9e-06			0.003			-0.003
30	90	330	5	0	-1.122e-05	1.122e-05	1.25888e-10			1.122e-05			-1.122e-05
30	90	30	5	0	-4.6975e-06	4.6975e-06	2.20665e-11			4.6975e-06			-4.6975e-06
30	90	180	5	30	30	0	0			0			60
30	90	270	5	0	6.3304e-06	-6.3304e-06	4.0074e-11			6.3304e-06			6.3304e-06
180	90	330	5	0	-0.00025608	0.00025608	6.5577e-08			0.00025608			-0.00025608
180	90	30	5	0	-1.2596e-05	1.2596e-05	1.58659e-10			1.2596e-05			-1.2596e-05
180	90	180	5	0	-2.176e-05	2.176e-05	4.73498e-10			2.176e-05			-2.176e-05
180	90	270	5	0	-0.00018329	0.00018329	3.35952e-08			0.00018329			-0.00018329
90	180	330	5	0	-0.00025738	0.00025738	6.62445e-08			0.00025738			-0.00025738
90	180	30	5	0	-3.4745e-05	3.4745e-05	1.20722e-09			3.4745e-05			-3.4745e-05
90	180	90	5	0	2.1748e-05	-2.1748e-05	4.72976e-10			2.1748e-05			2.1748e-05
90	180	270	5	0	-0.00018402	0.00018402	3.38634e-08			0.00018402			-0.00018402
270	180	330	5	0	-0.0515	0.0515	0.00265225			0.0515			-0.0515
270	180	30	5	0	-0.00021225	0.00021225	4.50501e-08			0.00021225			-0.00021225
270	180	90	5	0	-0.00053165	0.00053165	2.82652e-07			0.00053165			-0.00053165
270	180	270	5	0	-0.0402	0.0402	0.00161604			0.0402			-0.0402
330	180	330	5	0	-0.0676	0.0676	0.00456976			0.0676			-0.0676
330	180	30	5	0	-0.00032074	0.00032074	1.02874e-07			0.00032074			-0.00032074
330	180	90	5	0	-0.00078354	0.00078354	6.13935e-07			0.00078354			-0.00078354
330	180	270	5	0	-0.0537	0.0537	0.00288369			0.0537			-0.0537
30	180	330	5	0	-9.8771e-05	9.8771e-05	9.75571e-09			9.8771e-05			-9.8771e-05
30	180	30	5	0	3.0634e-05	-3.0634e-05	9.38442e-10			3.0634e-05			3.0634e-05
30	180	90	5	0	-1.8941e-05	1.8941e-05	3.58761e-10			1.8941e-05			-1.8941e-05
30	180	270	5	0	-7.0197e-05	7.0197e-05	4.92762e-09			7.0197e-05			-7.0197e-05
180	180	330	5	-30	-30.005	0.005	2.5e-05			0.005			-60.005
180	180	30	5	30	30	0	0			0			60
180	180	90	5	30	30	0	0			0			60
180	180	270	5	-30	-30.0038	0.0038	1.444e-05			0.0038			-60.0038
90	270	330	5	0	-0.0029	0.0029	8.41e-06			0.0029			-0.0029
90	270	30	5	0	-8.8338e-06	8.8338e-06	7.8036e-11			8.8338e-06			-8.8338e-06
90	270	90	5	0	-2.297e-05	2.297e-05	5.27621e-10			2.297e-05			-2.297e-05
90	270	180	5	0	-0.00031056	0.00031056	9.64475e-08			0.00031056			-0.00031056
270	270	330	5	-30	-30.4732	0.4732	0.223918			0.4732			-60.4732
270	270	30	5	-30	-30.0027	0.0027	7.29e-06			0.0027			-60.0027
270	270	90	5	60	59.9936	0.0064	4.096e-05			0.0064			119.994
270	270	180	5	30	29.9334	0.0666	0.00443556			0.0666			59.9334
330	270	330	5	0	-0.6016	0.6016	0.361923			0.6016			-0.6016
330	270	30	5	0	-0.0038	0.0038	1.444e-05			0.0038			-0.0038
330	270	90	5	0	-0.0088	0.0088	7.744e-05			0.0088			-0.0088
330	270	180	5	-30	-30.089	0.089	0.007921			0.089			-60.089
30	270	330	5	0	-0.0012	0.0012	1.44e-06			0.0012			-0.0012
30	270	30	5	0	-1.8543e-06	1.8543e-06	3.43843e-12			1.8543e-06			-1.8543e-06
30	270	90	5	0	-8.9545e-06	8.9545e-06	8.01831e-11			8.9545e-06			-8.9545e-06
30	270	180	5	0	-0.00011755	0.00011755	1.3818e-08			0.00011755			-0.00011755
180	270	330	5	0	-0.0515	0.0515	0.00265225			0.0515			-0.0515
180	270	30	5	0	-0.00021253	0.00021253	4.5169e-08			0.00021253			-0.00021253
180	270	90	5	0	-0.00053219	0.00053219	2.83226e-07			0.00053219			-0.00053219
180	270	180	5	0	-0.0063	0.0063	3.969e-05			0.0063			-0.0063
90	30	330	10	60	60	0	0			0			120
270	330	30	10	-60	-60.0045	0.0045	2.025e-05			0.0045			-120.005
330	90	90	10	0	-4.0664e-05	4.0664e-05	1.65356e-09			4.0664e-05			-4.0664e-05
30	180	180	10	0	-1.0164e-05	1.0164e-05	1.03307e-10			1.0164e-05			-1.0164e-05
180	270	270	10	0	-0.0423	0.0423	0.00178929			0.0423			-0.0423
90	330	30	10	0	-1.7137e-05	1.7137e-05	2.93677e-10			1.7137e-05			-1.7137e-05
90	90	90	10	30	30.0003	-0.0003	9e-08			0.0003			60.0003
90	180	180	10	0	-1.9669e-05	1.9669e-05	3.8687e-10			1.9669e-05			-1.9669e-05
90	270	270	10	0	-0.0023	0.0023	5.29e-06			0.0023			-0.0023
270	30	330	10	0	-0.0012	0.0012	1.44e-06			0.0012			-0.0012
270	90	90	10	0	-2.2478e-05	2.2478e-05	5.0526e-10			2.2478e-05			-2.2478e-05
270	180	180	10	0	-0.0066	0.0066	4.356e-05			0.0066			-0.0066
270	270	270	10	30	29.5993	0.4007	0.16056			0.4007			59.5993
330	30	330	10	0	-0.0017	0.0017	2.89e-06			0.0017			-0.0017
330	330	30	10	0	-0.006	0.006	3.6e-05			0.006			-0.006
330	180	180	10	0	-0.0093	0.0093	8.649e-05			0.0093			-0.0093
330	270	270	10	0	-0.5162	0.5162	0.266462			0.5162			-0.5162
30	30	330	10	0	-1.7261e-05	1.7261e-05	2.97942e-10			1.7261e-05			-1.7261e-05
30	330	30	10	0	-4.1003e-06	4.1003e-06	1.68125e-11			4.1003e-06			-4.1003e-06
30	90	90	10	0	0.00013971	-0.00013971	1.95189e-08			0.00013971			0.00013971
30	270	270	10	0	-0.00097459	0.00097459	9.49826e-07			0.00097459			-0.00097459
180	30	330	10	0	-0.00010331	0.00010331	1.0673e-08			0.00010331			-0.00010331
180	330	30	10	0	-0.00037239	0.00037239	1.38674e-07			0.00037239			-0.00037239
180	90	90	10	0	-1.2956e-05	1.2956e-05	1.67858e-10			1.2956e-05			-1.2956e-05
180	180	180	10	30	29.9995	0.0005	2.5e-07			0.0005			59.9995
90	330	330	10	0	-0.0042	0.0042	1.764e-05			0.0042			-0.0042
90	330	90	10	0	-3.8253e-05	3.8253e-05	1.46329e-09			3.8253e-05			-3.8253e-05
90	330	180	10	0	-0.00048129	0.00048129	2.3164e-07			0.00048129			-0.00048129
90	330	270	10	0	-0.0032	0.0032	1.024e-05			0.0032			-0.0032
270	330	330	10	0	-0.6324	0.6324	0.39993			0.6324			-0.6324
270	330	90	10	0	-0.0094	0.0094	8.836e-05			0.0094			-0.0094
270	330	180	10	0	-0.0935	0.0935	0.00874225			0.0935			-0.0935
270	330	270	10	0	-0.5162	0.5162	0.266462			0.5162			-0.5162
330	330	330	10	30	29.205	0.795	0.632025			0.795			59.205
330	330	90	10	30	29.9874	0.0126	0.00015876			0.0126			59.9874
330	330	180	10	30	29.8775	0.1225	0.0150062			0.1225			59.8775
330	330	270	10	30	29.3442	0.6558	0.430074			0.6558			59.3442
30	330	330	10	0	-0.0018	0.0018	3.24e-06			0.0018			-0.0018
30	330	90	10	0	-1.541e-05	1.541e-05	2.37468e-10			1.541e-05			-1.541e-05
30	330	180	10	0	-0.00018682	0.00018682	3.49017e-08			0.00018682			-0.00018682
30	330	270	10	-60	-60.0013	0.0013	1.69e-06			0.0013			-120.001
180	330	330	10	0	-0.0712	0.0712	0.00506944			0.0712			-0.0712
180	330	90	10	0	-0.00083814	0.00083814	7.02479e-07			0.00083814			-0.00083814
180	330	180	10	0	-0.0093	0.0093	8.649e-05			0.0093			-0.0093
180	330	270	10	0	-0.0566	0.0566	0.00320356			0.0566			-0.0566
90	30	30	10	0	0.00013305	-0.00013305	1.77023e-08			0.00013305			0.00013305
90	30	90	10	0	0.00011482	-0.00011482	1.31836e-08			0.00011482			0.00011482
90	30	180	10	0	9.9083e-06	-9.9083e-06	9.81744e-11			9.9083e-06			9.9083e-06
90	30	270	10	0	-2.9681e-05	2.9681e-05	8.80962e-10			2.9681e-05			-2.9681e-05
270	30	30	10	0	-5.8804e-07	5.8804e-07	3.45791e-13			5.8804e-07			-5.8804e-07
270	30	90	10	0	-1.1198e-05	1.1198e-05	1.25395e-10			1.1198e-05			-1.1198e-05
270	30	180	10	0	-0.00012534	0.00012534	1.57101e-08			0.00012534			-0.00012534
270	30	270	10	0	-0.00093316	0.00093316	8.70788e-07			0.00093316			-0.00093316
330	30	30	10	0	-6.886e-06	6.886e-06	4.7417e-11			6.886e-06			-6.886e-06
330	30	90	10	-60	-60	0	0			0			-120
330	30	180	10	0	-0.00019968	0.00019968	3.98721e-08			0.00019968			-0.00019968
330	30	270	10	0	-0.0013	0.0013	1.69e-06			0.0013			-0.0013
30	30	30	10	30	30.0001	-0.0001	1e-08			0.0001			60.0001
30	30	90	10	-30	-30.0007	0.0007	4.9e-07			0.0007			-60.0007
30	30	180	10	-30	-30	0	0			0			-60
30	30	270	10	30	30	0	0			0			60
180	30	30	10	0	-8.1316e-06	8.1316e-06	6.61229e-11			8.1316e-06			-8.1316e-06
180	30	90	10	0	2.4769e-06	-2.4769e-06	6.13503e-12			2.4769e-06			2.4769e-06
180	30	180	10	0	-8.3292e-06	8.3292e-06	6.93756e-11			8.3292e-06			-8.3292e-06
180	30	270	10	0	-7.0906e-05	7.0906e-05	5.02766e-09			7.0906e-05			-7.0906e-05
90	90	330	10	30	30	0	0			0			60
90	90	30	10	30	29.9996	0.0004	1.6e-07			0.0004			59.9996
90	90	180	10	-30	-30	0	0			0			-60
90	90	270	10	60	60	0	0			0			120
270	90	330	10	0	-0.0031	0.0031	9.61e-06			0.0031			-0.0031
270	90	30	10	0	-1.2552e-05	1.2552e-05	1.57553e-10			1.2552e-05			-1.2552e-05
270	90	180	10	0	-0.00032713	0.00032713	1.07014e-07			0.00032713			-0.00032713
270	90	270	10	0	-0.0023	0.0023	5.29e-06			0.0023			-0.0023
330	90	330	10	0	-0.0041	0.0041	1.681e-05			0.0041			-0.0041
330	90	30	10	0	-1.5009e-05	1.5009e-05	2.2527e-10			1.5009e-05			-1.5009e-05
330	90	180	10	0	-0.00048408	0.00048408	2.34333e-07			0.00048408			-0.00048408
330	90	270	10	0	-0.0032	0.0032	1.024e-05			0.0032			-0.0032
30	90	330	10	0	7.9307e-06	-7.9307e-06	6.2896e-11			7.9307e-06			7.9307e-06
30	90	30	10	0	-8.9608e-06	8.9608e-06	8.02959e-11			8.9608e-06			-8.9608e-06
30	90	180	10	30	30	0	0			0			60
30	90	270	10	0	-1.8414e-05	1.8414e-05	3.39075e-10			1.8414e-05			-1.8414e-05
180	90	330	10	0	-0.00026837	0.00026837	7.20225e-08			0.00026837			-0.00026837
180	90	30	10	0	1.4756e-05	-1.4756e-05	2.1774e-10			1.4756e-05			1.4756e-05
180	90	180	10	0	-2.1224e-05	2.1224e-05	4.50458e-10			2.1224e-05			-2.1224e-05
180	90	270	10	0	-0.00019464	0.00019464	3.78847e-08			0.00019464			-0.00019464
90	180	330	10	0	-0.00027036	0.00027036	7.30945e-08			0.00027036			-0.00027036
90	180	30	10	0	4.5424e-05	-4.5424e-05	2.06334e-09			4.5424e-05			4.5424e-05
90	180	90	10	0	-3.977e-05	3.977e-05	1.58165e-09			3.977e-05			-3.977e-05
90	180	270	10	0	-0.00019589	0.00019589	3.83729e-08			0.00019589			-0.00019589
270	180	330	10	0	-0.0541	0.0541	0.00292681			0.0541			-0.0541
270	180	30	10	0	-0.00024542	0.00024542	6.0231e-08			0.00024542			-0.00024542
270	180	90	10	0	-0.00056806	0.00056806	3.22692e-07			0.00056806			-0.00056806
270	180	270	10	0	-0.0423	0.0423	0.00178929			0.0423			-0.0423
330	180	330	10	0	-0.0711	0.0711	0.00505521			0.0711			-0.0711
330	180	30	10	0	-0.00037128	0.00037128	1.37849e-07			0.00037128			-0.00037128
330	180	90	10	0	-0.00083732	0.00083732	7.01105e-07			0.00083732			-0.00083732
330	180	270	10	0	-0.0565	0.0565	0.00319225			0.0565			-0.0565
30	180	330	10	0	-0.00010745	0.00010745	1.15455e-08			0.00010745			-0.00010745
30	180	30	10	0	-4.2593e-05	4.2593e-05	1.81416e-09			4.2593e-05			-4.2593e-05
30	180	90	10	0	3.3823e-05	-3.3823e-05	1.144e-09			3.3823e-05			3.3823e-05
30	180	270	10	0	-7.287e-05	7.287e-05	5.31004e-09			7.287e-05			-7.287e-05
180	180	330	10	-30	-30.0053	0.0053	2.809e-05			0.0053			-60.0053
180	180	30	10	30	30	0	0			0			60
180	180	90	10	30	30	0	0			0			60
180	180	270	10	-30	-30.004	0.004	1.6e-05			0.004			-60.004
90	270	330	10	0	-0.0031	0.0031	9.61e-06			0.0031			-0.0031
90	270	30	10	0	-9.4345e-06	9.4345e-06	8.90098e-11			9.4345e-06			-9.4345e-06
90	270	90	10	0	-2.5393e-05	2.5393e-05	6.44804e-10			2.5393e-05			-2.5393e-05
90	270	180	10	0	-0.00032704	0.00032704	1.06955e-07			0.00032704			-0.00032704
270	270	330	10	-30	-30.4971	0.4971	0.247108			0.4971			-60.4971
270	270	30	10	-30	-30.0032	0.0032	1.024e-05			0.0032			-60.0032
270	270	90	10	60	59.9932	0.0068	4.624e-05			0.0068			119.993
270	270	180	10	30	29.9299	0.0701	0.00491401			0.0701			59.9299
330	270	330	10	0	-0.6324	0.6324	0.39993			0.6324			-0.6324
330	270	30	10	0	-0.0044	0.0044	1.936e-05			0.0044			-0.0044
330	270	90	10	0	-0.0094	0.0094	8.836e-05			0.0094			-0.0094
330	270	180	10	-30	-30.0936	0.0936	0.00876096			0.0936			-60.0936
30	270	330	10	0	-0.0014	0.0014	1.96e-06			0.0014			-0.0014
30	270	30	10	0	-4.5657e-06	4.5657e-06	2.08456e-11			4.5657e-06			-4.5657e-06
30	270	90	10	0	-7.2746e-06	7.2746e-06	5.29198e-11			7.2746e-06			-7.2746e-06
30	270	180	10	0	-0.00012407	0.00012407	1.53934e-08			0.00012407			-0.00012407
180	270	330	10	0	-0.0542	0.0542	0.00293764			0.0542			-0.0542
180	270	30	10	0	-0.0002461	0.0002461	6.05652e-08			0.0002461			-0.0002461
180	270	90	10	0	-0.00056845	0.00056845	3.23135e-07			0.00056845			-0.00056845
180	270	180	10	0	-0.0066	0.0066	4.356e-05			0.0066			-0.0066
90	30	330	15	60	60	0	0			0			120
270	330	30	15	60	59.9957	0.0043	1.849e-05			0.0043			119.996
330	90	90	15	-60	-60	0	0			0			-120
30	180	180	15	0	-5.96e-06	5.96e-06	3.55216e-11			5.96e-06			-5.96e-06
180	270	270	15	0	-0.0401	0.0401	0.00160801			0.0401			-0.0401
90	330	30	15	0	-1.5201e-05	1.5201e-05	2.3107e-10			1.5201e-05			-1.5201e-05
90	90	90	15	0	-0.00013982	0.00013982	1.95496e-08			0.00013982			-0.00013982
90	180	180	15	0	-2.2587e-05	2.2587e-05	5.10173e-10			2.2587e-05			-2.2587e-05
90	270	270	15	0	-0.0022	0.0022	4.84e-06			0.0022			-0.0022
270	30	330	15	0	-0.0012	0.0012	1.44e-06			0.0012			-0.0012
270	90	90	15	0	-2.5196e-05	2.5196e-05	6.34838e-10			2.5196e-05			-2.5196e-05
270	180	180	15	0	-0.0063	0.0063	3.969e-05			0.0063			-0.0063
270	270	270	15	0	-0.3802	0.3802	0.144552			0.3802			-0.3802
330	30	330	15	0	-0.0016	0.0016	2.56e-06			0.0016			-0.0016
330	330	30	15	0	-0.0059	0.0059	3.481e-05			0.0059			-0.0059
330	180	180	15	0	-0.0088	0.0088	7.744e-05			0.0088			-0.0088
330	270	270	15	0	-0.4893	0.4893	0.239414			0.4893			-0.4893
30	30	330	15	0	6.859e-06	-6.859e-06	4.70459e-11			6.859e-06			6.859e-06
30	330	30	15	0	-5.9761e-06	5.9761e-06	3.57138e-11			5.9761e-06			-5.9761e-06
30	90	90	15	0	2.1572e-05	-2.1572e-05	4.65351e-10			2.1572e-05			2.1572e-05
30	270	270	15	0	-9.059e-05	9.059e-05	8.20655e-09			9.059e-05			-9.059e-05
180	30	330	15	0	-9.6727e-05	9.6727e-05	9.35611e-09			9.6727e-05			-9.6727e-05
180	330	30	15	0	-0.00036074	0.00036074	1.30133e-07			0.00036074			-0.00036074
180	90	90	15	0	4.6775e-06	-4.6775e-06	2.1879e-11			4.6775e-06			4.6775e-06
180	180	180	15	0	-0.00050247	0.00050247	2.52476e-07			0.00050247			-0.00050247
90	330	330	15	0	-0.0039	0.0039	1.521e-05			0.0039			-0.0039
90	330	90	15	0	-3.7797e-05	3.7797e-05	1.42861e-09			3.7797e-05			-3.7797e-05
90	330	180	15	0	-0.00045633	0.00045633	2.08237e-07			0.00045633			-0.00045633
90	330	270	15	0	-0.0031	0.0031	9.61e-06			0.0031			-0.0031
270	330	330	15	0	-0.5994	0.5994	0.35928			0.5994			-0.5994
270	330	90	15	0	-0.009	0.009	8.1e-05			0.009			-0.009
270	330	180	15	0	-0.0887	0.0887	0.00786769			0.0887			-0.0887
270	330	270	15	0	-0.4892	0.4892	0.239317			0.4892			-0.4892
330	330	330	15	0	-0.7534	0.7534	0.567612			0.7534			-0.7534
330	330	90	15	0	-0.0121	0.0121	0.00014641			0.0121			-0.0121
330	330	180	15	0	-0.1162	0.1162	0.0135024			0.1162			-0.1162
330	330	270	15	30	29.3786	0.6214	0.386138			0.6214			59.3786
30	330	330	15	0	-0.0016	0.0016	2.56e-06			0.0016			-0.0016
30	330	90	15	0	-1.2788e-05	1.2788e-05	1.63533e-10			1.2788e-05			-1.2788e-05
30	330	180	15	0	-1.774e-05	1.774e-05	3.14708e-10			1.774e-05			-1.774e-05
30	330	270	15	0	-0.0013	0.0013	1.69e-06			0.0013			-0.0013
180	330	330	15	60	59.9325	0.0675	0.00455625			0.0675			119.933
180	330	90	15	0	-0.00080019	0.00080019	6.40304e-07			0.00080019			-0.00080019
180	330	180	15	0	-0.0088	0.0088	7.744e-05			0.0088			-0.0088
180	330	270	15	0	-0.0536	0.0536	0.00287296			0.0536			-0.0536
90	30	30	15	0	-0.0001626	0.0001626	2.64388e-08			0.0001626			-0.0001626
90	30	90	15	0	1.3954e-05	-1.3954e-05	1.94714e-10			1.3954e-05			1.3954e-05
90	30	180	15	0	-8.7146e-06	8.7146e-06	7.59443e-11			8.7146e-06			-8.7146e-06
90	30	270	15	0	1.1388e-05	-1.1388e-05	1.29687e-10			1.1388e-05			1.1388e-05
270	30	30	15	0	-4.6737e-06	4.6737e-06	2.18435e-11			4.6737e-06			-4.6737e-06
270	30	90	15	0	-6.8634e-06	6.8634e-06	4.71063e-11			6.8634e-06			-6.8634e-06
270	30	180	15	0	-0.00011754	0.00011754	1.38157e-08			0.00011754			-0.00011754
270	30	270	15	0	-0.00088414	0.00088414	7.81704e-07			0.00088414			-0.00088414
330	30	30	15	0	-4.6305e-06	4.6305e-06	2.14415e-11			4.6305e-06			-4.6305e-06
330	30	90	15	0	-1.4536e-05	1.4536e-05	2.11295e-10			1.4536e-05			-1.4536e-05
330	30	180	15	360	360	0.0002	4e-08			0.0002			720
330	30	270	15	0	-0.0012	0.0012	1.44e-06			0.0012			-0.0012
30	30	30	15	0	0.00067392	-0.00067392	4.54168e-07			0.00067392			0.00067392
30	30	90	15	0	2.6039e-05	-2.6039e-05	6.7803e-10			2.6039e-05			2.6039e-05
30	30	180	15	0	5.5072e-06	-5.5072e-06	3.03293e-11			5.5072e-06			5.5072e-06
30	30	270	15	-30	-30	0	0			0			-60
180	30	30	15	0	5.0618e-06	-5.0618e-06	2.56218e-11			5.0618e-06			5.0618e-06
180	30	90	15	0	-3.043e-06	3.043e-06	9.25985e-12			3.043e-06			-3.043e-06
180	30	180	15	0	-6.7718e-06	6.7718e-06	4.58573e-11			6.7718e-06			-6.7718e-06
180	30	270	15	0	-6.9107e-05	6.9107e-05	4.77578e-09			6.9107e-05			-6.9107e-05
90	90	330	15	0	-4.0453e-06	4.0453e-06	1.63645e-11			4.0453e-06			-4.0453e-06
90	90	30	15	0	0.00020522	-0.00020522	4.21152e-08			0.00020522			0.00020522
90	90	180	15	0	1.279e-05	-1.279e-05	1.63584e-10			1.279e-05			1.279e-05
90	90	270	15	0	-1.9505e-05	1.9505e-05	3.80445e-10			1.9505e-05			-1.9505e-05
270	90	330	15	60	59.9971	0.0029	8.41e-06			0.0029			119.997
270	90	30	15	0	-8.1061e-06	8.1061e-06	6.57089e-11			8.1061e-06			-8.1061e-06
270	90	180	15	0	-0.00030946	0.00030946	9.57655e-08			0.00030946			-0.00030946
270	90	270	15	0	-0.0022	0.0022	4.84e-06			0.0022			-0.0022
330	90	330	15	0	-0.0039	0.0039	1.521e-05			0.0039			-0.0039
330	90	30	15	0	-1.6421e-05	1.6421e-05	2.69649e-10			1.6421e-05			-1.6421e-05
330	90	180	15	0	-0.00045672	0.00045672	2.08593e-07			0.00045672			-0.00045672
330	90	270	15	0	-0.003	0.003	9e-06			0.003			-0.003
30	90	330	15	0	-1.0416e-05	1.0416e-05	1.08493e-10			1.0416e-05			-1.0416e-05
30	90	30	15	0	-0.00013931	0.00013931	1.94073e-08			0.00013931			-0.00013931
30	90	180	15	0	-8.3717	8.3717	70.0853			8.3717			-8.3717
30	90	270	15	360	360	0	0			0			720
180	90	330	15	0	-0.00025548	0.00025548	6.527e-08			0.00025548			-0.00025548
180	90	30	15	0	-7.8203e-06	7.8203e-06	6.11571e-11			7.8203e-06			-7.8203e-06
180	90	180	15	-30	-30	0	0			0			-60
180	90	270	15	0	-0.00018292	0.00018292	3.34597e-08			0.00018292			-0.00018292
90	180	330	15	0	-0.00025703	0.00025703	6.60644e-08			0.00025703			-0.00025703
90	180	30	15	0	-2.2263e-05	2.2263e-05	4.95641e-10			2.2263e-05			-2.2263e-05
90	180	90	15	0	1.7459e-05	-1.7459e-05	3.04817e-10			1.7459e-05			1.7459e-05
90	180	270	15	0	-0.00018381	0.00018381	3.37861e-08			0.00018381			-0.00018381
270	180	330	15	0	-0.0513	0.0513	0.00263169			0.0513			-0.0513
270	180	30	15	0	-0.00023782	0.00023782	5.65584e-08			0.00023782			-0.00023782
270	180	90	15	0	-0.00054247	0.00054247	2.94274e-07			0.00054247			-0.00054247
270	180	270	15	0	-0.0401	0.0401	0.00160801			0.0401			-0.0401
330	180	330	15	0	-0.0673	0.0673	0.00452929			0.0673			-0.0673
330	180	30	15	0	-0.00035931	0.00035931	1.29104e-07			0.00035931			-0.00035931
330	180	90	15	0	-0.00079956	0.00079956	6.39296e-07			0.00079956			-0.00079956
330	180	270	15	0	-0.0536	0.0536	0.00287296			0.0536			-0.0536
30	180	330	15	0	-9.912e-05	9.912e-05	9.82477e-09			9.912e-05			-9.912e-05
30	180	30	15	0	2.2033e-05	-2.2033e-05	4.85453e-10			2.2033e-05			2.2033e-05
30	180	90	15	0	-1.8351e-05	1.8351e-05	3.36759e-10			1.8351e-05			-1.8351e-05
30	180	270	15	0	-7.0207e-05	7.0207e-05	4.92902e-09			7.0207e-05			-7.0207e-05
180	180	330	15	0	-0.005	0.005	2.5e-05			0.005			-0.005
180	180	30	15	-30	-30	0	0			0			-60
180	180	90	15	30	30	0	0			0			60
180	180	270	15	0	-0.0038	0.0038	1.444e-05			0.0038			-0.0038
90	270	330	15	0	-0.0029	0.0029	8.41e-06			0.0029			-0.0029
90	270	30	15	0	-9.8255e-06	9.8255e-06	9.65405e-11			9.8255e-06			-9.8255e-06
90	270	90	15	0	-2.3493e-05	2.3493e-05	5.51921e-10			2.3493e-05			-2.3493e-05
90	270	180	15	0	-0.00030998	0.00030998	9.60876e-08			0.00030998			-0.00030998
270	270	330	15	0	-0.4717	0.4717	0.222501			0.4717			-0.4717
270	270	30	15	0	-0.0031	0.0031	9.61e-06			0.0031			-0.0031
270	270	90	15	0	-0.0065	0.0065	4.225e-05			0.0065			-0.0065
270	270	180	15	60	59.9336	0.0664	0.00440896			0.0664			119.934
330	270	330	15	0	-0.5994	0.5994	0.35928			0.5994			-0.5994
330	270	30	15	0	-0.0043	0.0043	1.849e-05			0.0043			-0.0043
330	270	90	15	0	-0.009	0.009	8.1e-05			0.009			-0.009
330	270	180	15	0	-0.0888	0.0888	0.00788544			0.0888			-0.0888
30	270	330	15	360	359.999	0.0012	1.44e-06			0.0012			719.999
30	270	30	15	0	-2.4583e-06	2.4583e-06	6.04324e-12			2.4583e-06			-2.4583e-06
30	270	90	15	0	-8.8698e-06	8.8698e-06	7.86734e-11			8.8698e-06			-8.8698e-06
30	270	180	15	0	-0.00011748	0.00011748	1.38016e-08			0.00011748			-0.00011748
180	270	330	15	0	-0.0513	0.0513	0.00263169			0.0513			-0.0513
180	270	30	15	30	29.9998	0.0002	4e-08			0.0002			59.9998
180	270	90	15	0	-0.00054306	0.00054306	2.94914e-07			0.00054306			-0.00054306
180	270	180	15	0	-0.0063	0.0063	3.969e-05			0.0063			-0.0063
90	30	330	25	360	360	0	0			0			720
270	330	30	25	360	360.002	-0.0015	2.25e-06			0.0015			720.002
330	90	90	25	0	1.2978e-05	-1.2978e-05	1.68428e-10			1.2978e-05			1.2978e-05
30	180	180	25	0	2.5389e-06	-2.5389e-06	6.44601e-12			2.5389e-06			2.5389e-06
180	270	270	25	0	0.0138	-0.0138	0.00019044			0.0138			0.0138
90	330	30	25	0	5.4754e-06	-5.4754e-06	2.998e-11			5.4754e-06			5.4754e-06
90	90	90	25	0	-3.1375e-05	3.1375e-05	9.84391e-10			3.1375e-05			-3.1375e-05
90	180	180	25	0	7.2971e-06	-7.2971e-06	5.32477e-11			7.2971e-06			7.2971e-06
90	270	270	25	0	0.0007596	-0.0007596	5.76992e-07			0.0007596			0.0007596
270	30	330	25	0	0.00040591	-0.00040591	1.64763e-07			0.00040591			0.00040591
270	90	90	25	0	8.1853e-06	-8.1853e-06	6.69991e-11			8.1853e-06			8.1853e-06
270	180	180	25	0	0.0022	-0.0022	4.84e-06			0.0022			0.0022
270	270	270	25	0	0.1301	-0.1301	0.016926			0.1301			0.1301
330	30	330	25	0	0.00055576	-0.00055576	3.08869e-07			0.00055576			0.00055576
330	330	30	25	0	0.002	-0.002	4e-06			0.002			0.002
330	180	180	25	0	0.003	-0.003	9e-06			0.003			0.003
330	270	270	25	0	0.1677	-0.1677	0.0281233			0.1677			0.1677
30	30	330	25	0	5.3847e-07	-5.3847e-07	2.8995e-13			5.3847e-07			5.3847e-07
30	330	30	25	0	1.8652e-06	-1.8652e-06	3.47897e-12			1.8652e-06			1.8652e-06
30	90	90	25	0	3.7491e-05	-3.7491e-05	1.40558e-09			3.7491e-05			3.7491e-05
30	270	270	25	0	0.00030509	-0.00030509	9.30799e-08			0.00030509			0.00030509
180	30	330	25	0	3.3587e-05	-3.3587e-05	1.12809e-09			3.3587e-05			3.3587e-05
180	330	30	25	0	0.00012591	-0.00012591	1.58533e-08			0.00012591			0.00012591
180	90	90	25	0	1.4227e-06	-1.4227e-06	2.02408e-12			1.4227e-06			1.4227e-06
180	180	180	25	0	0.0001734	-0.0001734	3.00676e-08			0.0001734			0.0001734
90	330	330	25	0	0.0013	-0.0013	1.69e-06			0.0013			0.0013
90	330	90	25	0	1.2965e-05	-1.2965e-05	1.68091e-10			1.2965e-05			1.2965e-05
90	330	180	25	0	0.00015707	-0.00015707	2.4671e-08			0.00015707			0.00015707
90	330	270	25	30	30.001	-0.001	1e-06			0.001			60.001
270	330	330	25	0	0.2053	-0.2053	0.0421481			0.2053			0.2053
270	330	90	25	30	30.0031	-0.0031	9.61e-06			0.0031			60.0031
270	330	180	25	0	0.0304	-0.0304	0.00092416			0.0304			0.0304
270	330	270	25	0	0.1677	-0.1677	0.0281233			0.1677			0.1677
330	330	330	25	0	0.2581	-0.2581	0.0666156			0.2581			0.2581
330	330	90	25	0	0.0042	-0.0042	1.764e-05			0.0042			0.0042
330	330	180	25	30	30.0399	-0.0399	0.00159201			0.0399			60.0399
330	330	270	25	0	0.2129	-0.2129	0.0453264			0.2129			0.2129
30	330	330	25	0	0.00055658	-0.00055658	3.09781e-07			0.00055658			0.00055658
30	330	90	25	0	4.6488e-06	-4.6488e-06	2.16113e-11			4.6488e-06			4.6488e-06
30	330	180	25	0	6.0809e-05	-6.0809e-05	3.69773e-09			6.0809e-05			6.0809e-05
30	330	270	25	360	360	-0.0004	1.6e-07			0.0004			720
180	330	330	25	0	0.0232	-0.0232	0.00053824			0.0232			0.0232
180	330	90	25	0	0.00027717	-0.00027717	7.68232e-08			0.00027717			0.00027717
180	330	180	25	0	0.003	-0.003	9e-06			0.003			0.003
180	330	270	25	0	0.0184	-0.0184	0.00033856			0.0184			0.0184
90	30	30	25	0	-7.9908e-05	7.9908e-05	6.38529e-09			7.9908e-05			-7.9908e-05
90	30	90	25	0	5.7089e-05	-5.7089e-05	3.25915e-09			5.7089e-05			5.7089e-05
90	30	180	25	0	-2.3844e-06	2.3844e-06	5.68536e-12			2.3844e-06			-2.3844e-06
90	30	270	25	-30	-30	0	0			0			-60
270	30	30	25	0	1.0095e-06	-1.0095e-06	1.01909e-12			1.0095e-06			1.0095e-06
270	30	90	25	-30	-30	0	0			0			-60
270	30	180	25	0	4.0101e-05	-4.0101e-05	1.60809e-09			4.0101e-05			4.0101e-05
270	30	270	25	0	0.00030493	-0.00030493	9.29823e-08			0.00030493			0.00030493
330	30	30	25	0	1.8922e-06	-1.8922e-06	3.58042e-12			1.8922e-06			1.8922e-06
330	30	90	25	360	360	0	0			0			720
330	30	180	25	0	6.0356e-05	-6.0356e-05	3.64285e-09			6.0356e-05			6.0356e-05
330	30	270	25	0	0.00042797	-0.00042797	1.83158e-07			0.00042797			0.00042797
30	30	30	25	0	0.00013431	-0.00013431	1.80392e-08			0.00013431			0.00013431
30	30	90	25	0	-7.8765e-05	7.8765e-05	6.20393e-09			7.8765e-05			-7.8765e-05
30	30	180	25	-30	-30	0	0			0			-60
30	30	270	25	0	1.0004e-07	-1.0004e-07	1.0008e-14			1.0004e-07			1.0004e-07
180	30	30	25	0	1.9146e-06	-1.9146e-06	3.66569e-12			1.9146e-06			1.9146e-06
180	30	90	25	0	-1.4005e-06	1.4005e-06	1.9614e-12			1.4005e-06			-1.4005e-06
180	30	180	25	0	2.5735e-06	-2.5735e-06	6.6229e-12			2.5735e-06			2.5735e-06
180	30	270	25	0	2.3672e-05	-2.3672e-05	5.60364e-10			2.3672e-05			2.3672e-05
90	90	330	25	0	4.0931e-06	-4.0931e-06	1.67535e-11			4.0931e-06			4.0931e-06
90	90	30	25	0	3.8237e-05	-3.8237e-05	1.46207e-09			3.8237e-05			3.8237e-05
90	90	180	25	0	1.7663e-06	-1.7663e-06	3.11982e-12			1.7663e-06			1.7663e-06
90	90	270	25	60	60	0	0			0			120
270	90	330	25	0	0.00099511	-0.00099511	9.90244e-07			0.00099511			0.00099511
270	90	30	25	0	3.4145e-06	-3.4145e-06	1.16588e-11			3.4145e-06			3.4145e-06
270	90	180	25	0	1.0662e-06	-1.0662e-06	1.13678e-12			1.0662e-06			1.0662e-06
270	90	270	25	0	0.0075783	-0.0075783	5.74306e-05			0.0075783			0.0075783
330	90	330	25	0	0.0013	-0.0013	1.69e-06			0.0013			0.0013
330	90	30	25	0	5.4656e-06	-5.4656e-06	2.98728e-11			5.4656e-06			5.4656e-06
330	90	180	25	0	0.00015683	-0.00015683	2.45956e-08			0.00015683			0.00015683
330	90	270	25	0	0.001	-0.001	1e-06			0.001			0.001
30	90	330	25	0	1.3848e-06	-1.3848e-06	1.91767e-12			1.3848e-06			1.3848e-06
30	90	30	25	0	-4.6955e-05	4.6955e-05	2.20477e-09			4.6955e-05			-4.6955e-05
30	90	180	25	360	360	0	0			0			720
30	90	270	25	0	1.1122e-06	-1.1122e-06	1.23699e-12			1.1122e-06			1.1122e-06
180	90	330	25	0	8.8029e-05	-8.8029e-05	7.7491e-09			8.8029e-05			8.8029e-05
180	90	30	25	360	360	0	0			0			720
180	90	180	25	0	7.2779e-06	-7.2779e-06	5.29678e-11			7.2779e-06			7.2779e-06
180	90	270	25	0	6.3369e-05	-6.3369e-05	4.01563e-09			6.3369e-05			6.3369e-05
90	180	330	25	0	8.8167e-05	-8.8167e-05	7.77342e-09			8.8167e-05			8.8167e-05
90	180	30	25	0	-6.5156e-07	6.5156e-07	4.2453e-13			6.5156e-07			-6.5156e-07
90	180	90	25	0	1.1812e-06	-1.1812e-06	1.39523e-12			1.1812e-06			1.1812e-06
90	180	270	25	0	6.344e-05	-6.344e-05	4.02463e-09			6.344e-05			6.344e-05
270	180	330	25	0	0.0176	-0.0176	0.00030976			0.0176			0.0176
270	180	30	25	0	8.3123e-05	-8.3123e-05	6.90943e-09			8.3123e-05			8.3123e-05
270	180	90	25	0	0.00018801	-0.00018801	3.53478e-08			0.00018801			0.00018801
270	180	270	25	0	0.0138	-0.0138	0.00019044			0.0138			0.0138
330	180	330	25	0	0.0231	-0.0231	0.00053361			0.0231			0.0231
330	180	30	25	0	0.00012575	-0.00012575	1.58131e-08			0.00012575			0.00012575
330	180	90	25	0	0.0002774	-0.0002774	7.69508e-08			0.0002774			0.0002774
330	180	270	25	0	0.0184	-0.0184	0.00033856			0.0184			0.0184
30	180	330	25	0	3.357e-05	-3.357e-05	1.12694e-09			3.357e-05			3.357e-05
30	180	30	25	0	9.0736e-07	-9.0736e-07	8.23302e-13			9.0736e-07			9.0736e-07
30	180	90	25	0	-6.5595e-07	6.5595e-07	4.3027e-13			6.5595e-07			-6.5595e-07
30	180	270	25	0	2.3684e-05	-2.3684e-05	5.60932e-10			2.3684e-05			2.3684e-05
180	180	330	25	-30	-29.9983	-0.0017	2.89e-06			0.0017			-59.9983
180	180	30	25	30	30	0	0			0			60
180	180	90	25	0	1.2805e-05	-1.2805e-05	1.63968e-10			1.2805e-05			1.2805e-05
180	180	270	25	0	0.0013	-0.0013	1.69e-06			0.0013			0.0013
90	270	330	25	0	0.0009986	-0.0009986	9.97202e-07			0.0009986			0.0009986
90	270	30	25	0	3.3835e-06	-3.3835e-06	1.14481e-11			3.3835e-06			3.3835e-06
90	270	90	25	0	8.217e-06	-8.217e-06	6.75191e-11			8.217e-06			8.217e-06
90	270	180	25	0	0.00010675	-0.00010675	1.13956e-08			0.00010675			0.00010675
270	270	330	25	0	0.1614	-0.1614	0.02605			0.1614			0.1614
270	270	30	25	0	0.0011	-0.0011	1.21e-06			0.0011			0.0011
270	270	90	25	60	60.0022	-0.0022	4.84e-06			0.0022			120.002
270	270	180	25	0	0.0228	-0.0228	0.00051984			0.0228			0.0228
330	270	330	25	0	0.2053	-0.2053	0.0421481			0.2053			0.2053
330	270	30	25	0	0.0015	-0.0015	2.25e-06			0.0015			0.0015
330	270	90	25	0	0.0031	-0.0031	9.61e-06			0.0031			0.0031
330	270	180	25	360	360.03	-0.0304	0.00092416			0.0304			720.03
30	270	330	25	0	0.00040483	-0.00040483	1.63887e-07			0.00040483			0.00040483
30	270	30	25	0	1.0607e-06	-1.0607e-06	1.12508e-12			1.0607e-06			1.0607e-06
30	270	90	25	0	2.8771e-06	-2.8771e-06	8.2777e-12			2.8771e-06			2.8771e-06
30	270	180	25	0	4.024e-05	-4.024e-05	1.61926e-09			4.024e-05			4.024e-05
180	270	330	25	360	360.018	-0.0176	0.00030976			0.0176			720.018
180	270	30	25	0	8.3143e-05	-8.3143e-05	6.91276e-09			8.3143e-05			8.3143e-05
180	270	90	25	0	0.00018795	-0.00018795	3.53252e-08			0.00018795			0.00018795
180	270	180	25	0	0.0022	-0.0022	4.84e-06			0.0022			0.0022
