# Supplementary material for: The Neural-Fuzzy Approach as a Way of Preventing a Maritime Vessel Accident in a Heavy Traffic Zone
Source: Hindawi journal article supplement (doi:10.1155/2018/2367096), 2018-08-15
Supplement: f10 [file 2367096.f10.xlsx]

## Sheet: Лист1
1 input LV	2 input LV	3 input LV	4 input LV	Known value LV output	out	(output-out)	G1^2	sum	RMSE	|output-out|	sum	MAE	output+out	sum	SMAPE
90	330	0	0	0	1.0593e-07	-1.0593e-07	1.12212e-14	0.000975926	0.00136342	1.0593e-07	0.287677	0.000547956	1.0593e-07	9780.02	2.94148e-05
270	330	0	0	0	-0.00011119	0.00011119	1.23632e-08	0.000975926		0.00011119	0.287677		-0.00011119	9780.02
330	330	0	0	30	29.9996	0.0004	1.6e-07	0.000975914		0.0004	0.287566		59.9996	9780.02
30	330	0	0	0	-3.1525e-07	3.1525e-07	9.93826e-14	0.000975754		3.1525e-07	0.287166		-3.1525e-07	9720.02
180	330	0	0	0	-2.7741e-06	2.7741e-06	7.69563e-12	0.000975754		2.7741e-06	0.287165		-2.7741e-06	9720.02
90	30	0	0	0	6.1688e-06	-6.1688e-06	3.80541e-11	0.000975754		6.1688e-06	0.287163		6.1688e-06	9720.02
270	30	0	0	0	3.5009e-06	-3.5009e-06	1.22563e-11	0.000975754		3.5009e-06	0.287156		3.5009e-06	9720.02
330	30	0	0	0	1.6026e-05	-1.6026e-05	2.56833e-10	0.000975754		1.6026e-05	0.287153		1.6026e-05	9720.02
30	30	0	0	30	30	0	0	0.000975754		0	0.287137		60	9720.02
180	30	0	0	0	2.1122e-06	-2.1122e-06	4.46139e-12	0.000975754		2.1122e-06	0.287137		2.1122e-06	9660.02
90	90	0	0	30	30	0	0	0.000975754		0	0.287135		60	9660.02
270	90	0	0	0	-6.2226e-06	6.2226e-06	3.87208e-11	0.000975754		6.2226e-06	0.287135		-6.2226e-06	9600.02
330	90	0	0	0	-6.3988e-05	6.3988e-05	4.09446e-09	0.000975754		6.3988e-05	0.287129		-6.3988e-05	9600.02
30	90	0	0	0	2.4755e-05	-2.4755e-05	6.1281e-10	0.000975749		2.4755e-05	0.287065		2.4755e-05	9600.02
180	90	0	0	0	-3.4709e-05	3.4709e-05	1.20471e-09	0.000975749		3.4709e-05	0.28704		-3.4709e-05	9600.02
90	180	0	0	0	5.0175e-06	-5.0175e-06	2.51753e-11	0.000975748		5.0175e-06	0.287005		5.0175e-06	9600.02
270	180	0	0	0	3.8946e-06	-3.8946e-06	1.51679e-11	0.000975748		3.8946e-06	0.287		3.8946e-06	9600.02
330	180	0	0	0	-8.1181e-06	8.1181e-06	6.59035e-11	0.000975748		8.1181e-06	0.286996		-8.1181e-06	9600.02
30	180	0	0	0	3.0396e-05	-3.0396e-05	9.23917e-10	0.000975748		3.0396e-05	0.286988		3.0396e-05	9600.02
180	180	0	0	30	29.9993	0.0007	4.9e-07	0.000975747		0.0007	0.286958		59.9993	9600.02
90	270	0	0	0	2.9347e-06	-2.9347e-06	8.61246e-12	0.000975257		2.9347e-06	0.286258		2.9347e-06	9540.02
270	270	0	0	30	29.9994	0.0006	3.6e-07	0.000975257		0.0006	0.286255		59.9994	9540.02
330	270	0	0	0	-0.0016	0.0016	2.56e-06	0.000974897		0.0016	0.285655		-0.0016	9480.02
30	270	0	0	0	8.3311e-07	-8.3311e-07	6.94072e-13	0.000972337		8.3311e-07	0.284055		8.3311e-07	9480.02
180	270	0	0	0	-3.3462e-05	3.3462e-05	1.11971e-09	0.000972337		3.3462e-05	0.284054		-3.3462e-05	9480.02
90	30	330	5	-30	-30.0003	0.0003	9e-08	0.000972335		0.0003	0.28402		-60.0003	9480.02
270	330	30	5	0	0.00012735	-0.00012735	1.6218e-08	0.000972245		0.00012735	0.28372		0.00012735	9540.02
330	90	90	5	0	-8.9459e-06	8.9459e-06	8.00291e-11	0.000972229		8.9459e-06	0.283593		-8.9459e-06	9540.02
30	180	180	5	0	1.5569e-05	-1.5569e-05	2.42394e-10	0.000972229		1.5569e-05	0.283584		1.5569e-05	9540.02
180	270	270	5	0	-0.00026266	0.00026266	6.89903e-08	0.000972229		0.00026266	0.283569		-0.00026266	9540.02
90	330	30	5	0	1.3383e-06	-1.3383e-06	1.79105e-12	0.00097216		1.3383e-06	0.283306		1.3383e-06	9540.02
90	90	90	5	30	29.9998	0.0002	4e-08	0.00097216		0.0002	0.283305		59.9998	9540.02
90	180	180	5	0	3.0604e-05	-3.0604e-05	9.36605e-10	0.00097212		3.0604e-05	0.283105		3.0604e-05	9480.02
90	270	270	5	0	-1.0668e-05	1.0668e-05	1.13806e-10	0.000972119		1.0668e-05	0.283074		-1.0668e-05	9480.02
270	30	330	5	0	-6.9484e-05	6.9484e-05	4.82803e-09	0.000972119		6.9484e-05	0.283063		-6.9484e-05	9480.02
270	90	90	5	0	5.7204e-05	-5.7204e-05	3.2723e-09	0.000972114		5.7204e-05	0.282994		5.7204e-05	9480.02
270	180	180	5	0	-0.00017667	0.00017667	3.12123e-08	0.000972111		0.00017667	0.282937		-0.00017667	9480.02
270	270	270	5	30	29.9975	0.0025	6.25e-06	0.00097208		0.0025	0.28276		59.9975	9480.02
330	30	330	5	0	2.345e-05	-2.345e-05	5.49903e-10	0.00096583		2.345e-05	0.28026		2.345e-05	9420.02
330	330	30	5	0	-0.0001197	0.0001197	1.43281e-08	0.000965829		0.0001197	0.280236		-0.0001197	9420.02
330	180	180	5	0	-0.00016493	0.00016493	2.72019e-08	0.000965815		0.00016493	0.280117		-0.00016493	9420.02
330	270	270	5	0	0.00072629	-0.00072629	5.27497e-07	0.000965787		0.00072629	0.279952		0.00072629	9420.02
30	30	330	5	0	0.00020512	-0.00020512	4.20742e-08	0.00096526		0.00020512	0.279226		0.00020512	9420.02
30	330	30	5	0	-2.426e-06	2.426e-06	5.88548e-12	0.000965218		2.426e-06	0.27902		-2.426e-06	9420.02
30	90	90	5	0	-1.0395e-05	1.0395e-05	1.08056e-10	0.000965218		1.0395e-05	0.279018		-1.0395e-05	9420.02
30	270	270	5	0	-0.00043174	0.00043174	1.86399e-07	0.000965218		0.00043174	0.279008		-0.00043174	9420.02
180	30	330	5	0	-4.2633e-05	4.2633e-05	1.81757e-09	0.000965031		4.2633e-05	0.278576		-4.2633e-05	9420.02
180	330	30	5	0	-3.9709e-06	3.9709e-06	1.5768e-11	0.00096503		3.9709e-06	0.278533		-3.9709e-06	9420.02
180	90	90	5	0	-1.713e-05	1.713e-05	2.93437e-10	0.00096503		1.713e-05	0.278529		-1.713e-05	9420.02
180	180	180	5	30	30.0021	-0.0021	4.41e-06	0.000965029		0.0021	0.278512		60.0021	9420.02
90	330	330	5	0	-9.9941e-05	9.9941e-05	9.9882e-09	0.000960619		9.9941e-05	0.276412		-9.9941e-05	9360.02
90	330	90	5	0	-5.3367e-06	5.3367e-06	2.84804e-11	0.000960609		5.3367e-06	0.276312		-5.3367e-06	9360.02
90	330	180	5	0	-0.00011719	0.00011719	1.37335e-08	0.000960609		0.00011719	0.276307		-0.00011719	9360.02
90	330	270	5	0	-9.6984e-05	9.6984e-05	9.4059e-09	0.000960596		9.6984e-05	0.27619		-9.6984e-05	9360.02
270	330	330	5	0	0.0004634	-0.0004634	2.1474e-07	0.000960586		0.0004634	0.276093		0.0004634	9360.02
270	330	90	5	0	0.00041864	-0.00041864	1.75259e-07	0.000960371		0.00041864	0.275629		0.00041864	9360.02
270	330	180	5	0	0.0011	-0.0011	1.21e-06	0.000960196		0.0011	0.275211		0.0011	9360.02
270	330	270	5	0	0.0003387	-0.0003387	1.14718e-07	0.000958986		0.0003387	0.274111		0.0003387	9360.02
330	330	330	5	30	30.0008	-0.0008	6.4e-07	0.000958871		0.0008	0.273772		60.0008	9360.02
330	330	90	5	30	30	0	0	0.000958231		0	0.272972		60	9300.02
330	330	180	5	30	30.001	-0.001	1e-06	0.000958231		0.001	0.272972		60.001	9240.02
330	330	270	5	30	29.9987	0.0013	1.69e-06	0.000957231		0.0013	0.271972		59.9987	9180.02
30	330	330	5	0	-8.6414e-05	8.6414e-05	7.46738e-09	0.000955541		8.6414e-05	0.270672		-8.6414e-05	9120.02
30	330	90	5	0	-1.1609e-05	1.1609e-05	1.34769e-10	0.000955534		1.1609e-05	0.270586		-1.1609e-05	9120.02
30	330	180	5	0	-4.5838e-05	4.5838e-05	2.10112e-09	0.000955534		4.5838e-05	0.270574		-4.5838e-05	9120.02
30	330	270	5	-30	-30.0021	0.0021	4.41e-06	0.000955532		0.0021	0.270528		-60.0021	9120.02
180	330	330	5	0	-0.00069391	0.00069391	4.81511e-07	0.000951122		0.00069391	0.268428		-0.00069391	9180.02
180	330	90	5	0	3.7214e-05	-3.7214e-05	1.38488e-09	0.00095064		3.7214e-05	0.267734		3.7214e-05	9180.02
180	330	180	5	0	8.9793e-06	-8.9793e-06	8.06278e-11	0.000950639		8.9793e-06	0.267697		8.9793e-06	9180.02
180	330	270	5	0	-0.00065073	0.00065073	4.2345e-07	0.000950639		0.00065073	0.267688		-0.00065073	9180.02
90	30	30	5	0	1.8758e-05	-1.8758e-05	3.51863e-10	0.000950215		1.8758e-05	0.267037		1.8758e-05	9180.02
90	30	90	5	0	8.7424e-05	-8.7424e-05	7.64296e-09	0.000950215		8.7424e-05	0.267018		8.7424e-05	9180.02
90	30	180	5	0	0.00017942	-0.00017942	3.21915e-08	0.000950207		0.00017942	0.266931		0.00017942	9180.02
90	30	270	5	0	4.3164e-05	-4.3164e-05	1.86313e-09	0.000950175		4.3164e-05	0.266752		4.3164e-05	9180.02
270	30	30	5	0	-3.7314e-05	3.7314e-05	1.39233e-09	0.000950173		3.7314e-05	0.266708		-3.7314e-05	9180.02
270	30	90	5	0	-1.2425e-05	1.2425e-05	1.54381e-10	0.000950172		1.2425e-05	0.266671		-1.2425e-05	9180.02
270	30	180	5	0	-0.00030423	0.00030423	9.25559e-08	0.000950172		0.00030423	0.266659		-0.00030423	9180.02
270	30	270	5	0	-6.1928e-05	6.1928e-05	3.83508e-09	0.000950079		6.1928e-05	0.266355		-6.1928e-05	9180.02
330	30	30	5	0	-0.00016332	0.00016332	2.66734e-08	0.000950075		0.00016332	0.266293		-0.00016332	9180.02
330	30	90	5	-60	-60.0003	0.0003	9e-08	0.000950049		0.0003	0.266129		-120	9180.02
330	30	180	5	0	0.0001336	-0.0001336	1.7849e-08	0.000949959		0.0001336	0.265829		0.0001336	9300.02
330	30	270	5	0	-4.437e-05	4.437e-05	1.9687e-09	0.000949941		4.437e-05	0.265696		-4.437e-05	9300.02
30	30	30	5	30	30	0	0	0.000949939		0	0.265651		60	9300.02
30	30	90	5	-30	-30	0	0	0.000949939		0	0.265651		-60	9240.02
30	30	180	5	-30	-30.0001	0.0001	1e-08	0.000949939		0.0001	0.265651		-60.0001	9300.02
30	30	270	5	30	29.9997	0.0003	9e-08	0.000949929		0.0003	0.265551		59.9997	9360.02
180	30	30	5	0	9.1222e-06	-9.1222e-06	8.32145e-11	0.000949839		9.1222e-06	0.265251		9.1222e-06	9300.02
180	30	90	5	0	3.1375e-05	-3.1375e-05	9.84391e-10	0.000949839		3.1375e-05	0.265242		3.1375e-05	9300.02
180	30	180	5	0	-5.9283e-06	5.9283e-06	3.51447e-11	0.000949838		5.9283e-06	0.265211		-5.9283e-06	9300.02
180	30	270	5	0	7.9509e-05	-7.9509e-05	6.32168e-09	0.000949838		7.9509e-05	0.265205		7.9509e-05	9300.02
90	90	330	5	30	30.0013	-0.0013	1.69e-06	0.000949831		0.0013	0.265125		60.0013	9300.02
90	90	30	5	30	30	0	0	0.000948141		0	0.263825		60	9240.02
90	90	180	5	-30	-30.0005	0.0005	2.5e-07	0.000948141		0.0005	0.263825		-60.0005	9180.02
90	90	270	5	60	59.9994	0.0006	3.6e-07	0.000947891		0.0006	0.263325		119.999	9240.02
270	90	330	5	0	2.2779e-05	-2.2779e-05	5.18883e-10	0.000947531		2.2779e-05	0.262725		2.2779e-05	9120.02
270	90	30	5	0	-0.00015088	0.00015088	2.27648e-08	0.000947531		0.00015088	0.262703		-0.00015088	9120.02
270	90	180	5	0	-0.0007363	0.0007363	5.42138e-07	0.000947508		0.0007363	0.262552		-0.0007363	9120.02
270	90	270	5	0	-0.0001087	0.0001087	1.18157e-08	0.000946966		0.0001087	0.261815		-0.0001087	9120.02
330	90	330	5	0	2.2723e-05	-2.2723e-05	5.16335e-10	0.000946954		2.2723e-05	0.261707		2.2723e-05	9120.02
330	90	30	5	0	-0.000676	0.000676	4.56976e-07	0.000946954		0.000676	0.261684		-0.000676	9120.02
330	90	180	5	0	-0.00019982	0.00019982	3.9928e-08	0.000946497		0.00019982	0.261008		-0.00019982	9120.02
330	90	270	5	0	-6.9767e-05	6.9767e-05	4.86743e-09	0.000946457		6.9767e-05	0.260808		-6.9767e-05	9120.02
30	90	330	5	0	-0.00046664	0.00046664	2.17753e-07	0.000946452		0.00046664	0.260738		-0.00046664	9120.03
30	90	30	5	0	3.4431e-05	-3.4431e-05	1.18549e-09	0.000946234		3.4431e-05	0.260272		3.4431e-05	9120.03
30	90	180	5	30	29.9999	0.0001	1e-08	0.000946233		0.0001	0.260237		59.9999	9120.03
30	90	270	5	0	-0.00068025	0.00068025	4.6274e-07	0.000946223		0.00068025	0.260137		-0.00068025	9060.03
180	90	330	5	0	0.00028535	-0.00028535	8.14246e-08	0.00094576		0.00028535	0.259457		0.00028535	9060.03
180	90	30	5	0	-6.6702e-06	6.6702e-06	4.44916e-11	0.000945679		6.6702e-06	0.259172		-6.6702e-06	9060.03
180	90	180	5	0	4.9253e-05	-4.9253e-05	2.42586e-09	0.000945679		4.9253e-05	0.259165		4.9253e-05	9060.03
180	90	270	5	0	-6.7832e-05	6.7832e-05	4.60118e-09	0.000945676		6.7832e-05	0.259116		-6.7832e-05	9060.03
90	180	330	5	0	0.00029133	-0.00029133	8.48732e-08	0.000945672		0.00029133	0.259048		0.00029133	9060.03
90	180	30	5	0	5.5136e-05	-5.5136e-05	3.03998e-09	0.000945587		5.5136e-05	0.258757		5.5136e-05	9060.03
90	180	90	5	0	-1.4572e-06	1.4572e-06	2.12343e-12	0.000945584		1.4572e-06	0.258701		-1.4572e-06	9060.03
90	180	270	5	0	0.00040231	-0.00040231	1.61853e-07	0.000945584		0.00040231	0.2587		0.00040231	9060.03
270	180	330	5	0	0.00019724	-0.00019724	3.89036e-08	0.000945422		0.00019724	0.258298		0.00019724	9060.03
270	180	30	5	0	-4.3419e-05	4.3419e-05	1.88521e-09	0.000945383		4.3419e-05	0.2581		-4.3419e-05	9060.03
270	180	90	5	0	7.6502e-06	-7.6502e-06	5.85256e-11	0.000945381		7.6502e-06	0.258057		7.6502e-06	9060.03
270	180	270	5	0	4.189e-05	-4.189e-05	1.75477e-09	0.000945381		4.189e-05	0.258049		4.189e-05	9060.03
330	180	330	5	0	0.00041681	-0.00041681	1.73731e-07	0.000945379		0.00041681	0.258008		0.00041681	9060.03
330	180	30	5	0	3.0583e-05	-3.0583e-05	9.3532e-10	0.000945206		3.0583e-05	0.257591		3.0583e-05	9060.02
330	180	90	5	0	2.2315e-05	-2.2315e-05	4.97959e-10	0.000945205		2.2315e-05	0.25756		2.2315e-05	9060.02
330	180	270	5	0	-8.5091e-05	8.5091e-05	7.24048e-09	0.000945204		8.5091e-05	0.257538		-8.5091e-05	9060.02
30	180	330	5	0	-3.9719e-05	3.9719e-05	1.5776e-09	0.000945197		3.9719e-05	0.257453		-3.9719e-05	9060.02
30	180	30	5	0	-4.5575e-06	4.5575e-06	2.07708e-11	0.000945195		4.5575e-06	0.257413		-4.5575e-06	9060.02
30	180	90	5	0	-2.0383e-05	2.0383e-05	4.15467e-10	0.000945195		2.0383e-05	0.257408		-2.0383e-05	9060.02
30	180	270	5	0	-4.6784e-05	4.6784e-05	2.18874e-09	0.000945195		4.6784e-05	0.257388		-4.6784e-05	9060.02
180	180	330	5	-30	-29.9994	-0.0006	3.6e-07	0.000945193		0.0006	0.257341		-59.9994	9060.02
180	180	30	5	30	30.0022	-0.0022	4.84e-06	0.000944833		0.0022	0.256741		60.0022	9120.02
180	180	90	5	30	30.0001	-0.0001	1e-08	0.000939993		0.0001	0.254541		60.0001	9060.02
180	180	270	5	-30	-29.9997	-0.0003	9e-08	0.000939983		0.0003	0.254441		-59.9997	9000.02
90	270	330	5	0	3.4318e-05	-3.4318e-05	1.17773e-09	0.000939893		3.4318e-05	0.254141		3.4318e-05	9060.02
90	270	30	5	0	1.5307e-06	-1.5307e-06	2.34304e-12	0.000939892		1.5307e-06	0.254107		1.5307e-06	9060.02
90	270	90	5	0	-6.6176e-06	6.6176e-06	4.37926e-11	0.000939892		6.6176e-06	0.254105		-6.6176e-06	9060.02
90	270	180	5	0	5.7913e-05	-5.7913e-05	3.35392e-09	0.000939891		5.7913e-05	0.254099		5.7913e-05	9060.02
270	270	330	5	-30	-29.9994	-0.0006	3.6e-07	0.000939888		0.0006	0.254041		-59.9994	9060.02
270	270	30	5	-30	-30.0007	0.0007	4.9e-07	0.000939528		0.0007	0.253441		-60.0007	9120.02
270	270	90	5	60	60.0008	-0.0008	6.4e-07	0.000939038		0.0008	0.252741		120.001	9180.02
270	270	180	5	30	29.9999	0.0001	1e-08	0.000938398		0.0001	0.251941		59.9999	9060.02
330	270	330	5	0	-0.00035479	0.00035479	1.25876e-07	0.000938388		0.00035479	0.251841		-0.00035479	9000.02
330	270	30	5	0	0.00057934	-0.00057934	3.35635e-07	0.000938262		0.00057934	0.251486		0.00057934	9000.02
330	270	90	5	0	0.0023	-0.0023	5.29e-06	0.000937927		0.0023	0.250907		0.0023	9000.02
330	270	180	5	-30	-30.0002	0.0002	4e-08	0.000932637		0.0002	0.248607		-60.0002	9000.02
30	270	330	5	0	-0.00025241	0.00025241	6.37108e-08	0.000932597		0.00025241	0.248407		-0.00025241	9060.02
30	270	30	5	0	7.8122e-07	-7.8122e-07	6.10305e-13	0.000932533		7.8122e-07	0.248154		7.8122e-07	9060.02
30	270	90	5	0	-1.0008e-07	1.0008e-07	1.0016e-14	0.000932533		1.0008e-07	0.248154		-1.0008e-07	9060.02
30	270	180	5	0	-3.8648e-07	3.8648e-07	1.49367e-13	0.000932533		3.8648e-07	0.248153		-3.8648e-07	9060.02
180	270	330	5	0	-0.00037089	0.00037089	1.37559e-07	0.000932533		0.00037089	0.248153		-0.00037089	9060.02
180	270	30	5	0	-4.3457e-05	4.3457e-05	1.88851e-09	0.000932395		4.3457e-05	0.247782		-4.3457e-05	9060.02
180	270	90	5	0	-2.4313e-05	2.4313e-05	5.91122e-10	0.000932393		2.4313e-05	0.247739		-2.4313e-05	9060.02
180	270	180	5	0	0.00018917	-0.00018917	3.57853e-08	0.000932393		0.00018917	0.247714		0.00018917	9060.02
90	30	330	10	60	59.9994	0.0006	3.6e-07	0.000932357		0.0006	0.247525		119.999	9060.02
270	330	30	10	-60	-59.9994	-0.0006	3.6e-07	0.000931997		0.0006	0.246925		-119.999	8940.02
330	90	90	10	0	-0.00012038	0.00012038	1.44913e-08	0.000931637		0.00012038	0.246325		-0.00012038	9060.02
30	180	180	10	0	5.4919e-05	-5.4919e-05	3.0161e-09	0.000931623		5.4919e-05	0.246205		5.4919e-05	9060.02
180	270	270	10	0	8.4965e-05	-8.4965e-05	7.21905e-09	0.00093162		8.4965e-05	0.24615		8.4965e-05	9060.02
90	330	30	10	0	9.8682e-06	-9.8682e-06	9.73814e-11	0.000931612		9.8682e-06	0.246065		9.8682e-06	9060.02
90	90	90	10	30	30	0	0	0.000931612		0	0.246055		60	9060.02
90	180	180	10	0	3.8925e-05	-3.8925e-05	1.51516e-09	0.000931612		3.8925e-05	0.246055		3.8925e-05	9000.02
90	270	270	10	0	-1.9486e-05	1.9486e-05	3.79704e-10	0.000931611		1.9486e-05	0.246016		-1.9486e-05	9000.02
270	30	330	10	0	-0.00022728	0.00022728	5.16562e-08	0.00093161		0.00022728	0.245997		-0.00022728	9000.02
270	90	90	10	0	0.00035696	-0.00035696	1.2742e-07	0.000931559		0.00035696	0.245769		0.00035696	9000.02
270	180	180	10	0	-0.00080094	0.00080094	6.41505e-07	0.000931431		0.00080094	0.245412		-0.00080094	9000.02
270	270	270	10	30	30.0003	-0.0003	9e-08	0.00093079		0.0003	0.244612		60.0003	9000.02
330	30	330	10	0	7.8352e-05	-7.8352e-05	6.13904e-09	0.0009307		7.8352e-05	0.244312		7.8352e-05	8940.02
330	330	30	10	0	0.0005653	-0.0005653	3.19564e-07	0.000930694		0.0005653	0.244233		0.0005653	8940.02
330	180	180	10	0	-0.00033777	0.00033777	1.14089e-07	0.000930374		0.00033777	0.243668		-0.00033777	8940.02
330	270	270	10	0	0.0011	-0.0011	1.21e-06	0.00093026		0.0011	0.24333		0.0011	8940.02
30	30	330	10	0	0.00021158	-0.00021158	4.47661e-08	0.00092905		0.00021158	0.24223		0.00021158	8940.02
30	330	30	10	0	-1.9913e-05	1.9913e-05	3.96528e-10	0.000929005		1.9913e-05	0.242019		-1.9913e-05	8940.02
30	90	90	10	0	3.8668e-05	-3.8668e-05	1.49521e-09	0.000929005		3.8668e-05	0.241999		3.8668e-05	8940.02
30	270	270	10	0	-0.00065219	0.00065219	4.25352e-07	0.000929003		0.00065219	0.24196		-0.00065219	8940.02
180	30	330	10	0	6.6206e-05	-6.6206e-05	4.38323e-09	0.000928578		6.6206e-05	0.241308		6.6206e-05	8940.02
180	330	30	10	0	8.3599e-05	-8.3599e-05	6.98879e-09	0.000928574		8.3599e-05	0.241242		8.3599e-05	8940.02
180	90	90	10	0	2.5142e-05	-2.5142e-05	6.3212e-10	0.000928567		2.5142e-05	0.241158		2.5142e-05	8940.02
180	180	180	10	30	30.0008	-0.0008	6.4e-07	0.000928566		0.0008	0.241133		60.0008	8940.02
90	330	330	10	0	-0.00029091	0.00029091	8.46286e-08	0.000927926		0.00029091	0.240333		-0.00029091	8880.02
90	330	90	10	0	-1.587e-05	1.587e-05	2.51857e-10	0.000927841		1.587e-05	0.240042		-1.587e-05	8880.02
90	330	180	10	0	-0.0003766	0.0003766	1.41828e-07	0.000927841		0.0003766	0.240026		-0.0003766	8880.02
90	330	270	10	0	-0.00011373	0.00011373	1.29345e-08	0.000927699		0.00011373	0.239649		-0.00011373	8880.02
270	330	330	10	0	0.0023	-0.0023	5.29e-06	0.000927686		0.0023	0.239536		0.0023	8880.02
270	330	90	10	0	0.00064353	-0.00064353	4.14131e-07	0.000922396		0.00064353	0.237236		0.00064353	8880.02
270	330	180	10	0	0.0022	-0.0022	4.84e-06	0.000921982		0.0022	0.236592		0.0022	8880.02
270	330	270	10	0	-0.0002664	0.0002664	7.0969e-08	0.000917142		0.0002664	0.234392		-0.0002664	8880.01
330	330	330	10	30	30.0019	-0.0019	3.61e-06	0.000917071		0.0019	0.234126		60.0019	8880.01
330	330	90	10	30	30.0008	-0.0008	6.4e-07	0.000913461		0.0008	0.232226		60.0008	8820.01
330	330	180	10	30	30.0005	-0.0005	2.5e-07	0.000912821		0.0005	0.231426		60.0005	8760.01
330	330	270	10	30	30.0002	-0.0002	4e-08	0.000912571		0.0002	0.230926		60.0002	8700.01
30	330	330	10	0	0.00026159	-0.00026159	6.84293e-08	0.000912531		0.00026159	0.230726		0.00026159	8640.01
30	330	90	10	0	-4.3186e-05	4.3186e-05	1.86503e-09	0.000912463		4.3186e-05	0.230464		-4.3186e-05	8640.01
30	330	180	10	0	-0.00011389	0.00011389	1.29709e-08	0.000912461		0.00011389	0.230421		-0.00011389	8640.01
30	330	270	10	-60	-60	0	0	0.000912448		0	0.230307		-120	8640.01
180	330	330	10	0	-0.00066785	0.00066785	4.46024e-07	0.000912448		0.00066785	0.230307		-0.00066785	8760.01
180	330	90	10	0	0.00014888	-0.00014888	2.21653e-08	0.000912002		0.00014888	0.229639		0.00014888	8760.01
180	330	180	10	0	0.00012022	-0.00012022	1.44528e-08	0.00091198		0.00012022	0.22949		0.00012022	8760.01
180	330	270	10	0	-0.00019303	0.00019303	3.72606e-08	0.000911965		0.00019303	0.22937		-0.00019303	8760.01
90	30	30	10	0	1.1309e-05	-1.1309e-05	1.27893e-10	0.000911928		1.1309e-05	0.229177		1.1309e-05	8760.01
90	30	90	10	0	6.9184e-05	-6.9184e-05	4.78643e-09	0.000911928		6.9184e-05	0.229166		6.9184e-05	8760.01
90	30	180	10	0	0.00033475	-0.00033475	1.12058e-07	0.000911923		0.00033475	0.229097		0.00033475	8760.01
90	30	270	10	0	-0.00010522	0.00010522	1.10712e-08	0.000911811		0.00010522	0.228762		-0.00010522	8760.01
270	30	30	10	0	8.0253e-05	-8.0253e-05	6.44054e-09	0.0009118		8.0253e-05	0.228657		8.0253e-05	8760.01
270	30	90	10	0	0.00025336	-0.00025336	6.41913e-08	0.000911794		0.00025336	0.228576		0.00025336	8760.01
270	30	180	10	0	-0.00037617	0.00037617	1.41504e-07	0.000911729		0.00037617	0.228323		-0.00037617	8760.01
270	30	270	10	0	-0.00011117	0.00011117	1.23588e-08	0.000911588		0.00011117	0.227947		-0.00011117	8760.01
330	30	30	10	0	0.00028537	-0.00028537	8.1436e-08	0.000911576		0.00028537	0.227836		0.00028537	8760.01
330	30	90	10	-60	-59.9989	-0.0011	1.21e-06	0.000911494		0.0011	0.22755		-119.999	8760.01
330	30	180	10	0	-0.00016961	0.00016961	2.87676e-08	0.000910284		0.00016961	0.22645		-0.00016961	8880.01
330	30	270	10	0	-7.2026e-05	7.2026e-05	5.18774e-09	0.000910255		7.2026e-05	0.226281		-7.2026e-05	8880.01
30	30	30	10	30	30	0	0	0.00091025		0	0.226209		60	8880.01
30	30	90	10	-30	-30	0	0	0.00091025		0	0.226209		-60	8820.01
30	30	180	10	-30	-29.9998	-0.0002	4e-08	0.00091025		0.0002	0.226209		-59.9998	8880.01
30	30	270	10	30	30.0001	-0.0001	1e-08	0.00091021		0.0001	0.226009		60.0001	8940.01
180	30	30	10	0	2.7263e-06	-2.7263e-06	7.43271e-12	0.0009102		2.7263e-06	0.225909		2.7263e-06	8880.01
180	30	90	10	0	4.0109e-06	-4.0109e-06	1.60873e-11	0.0009102		4.0109e-06	0.225906		4.0109e-06	8880.01
180	30	180	10	0	0.00025622	-0.00025622	6.56487e-08	0.0009102		0.00025622	0.225902		0.00025622	8880.01
180	30	270	10	0	0.00013738	-0.00013738	1.88733e-08	0.000910134		0.00013738	0.225646		0.00013738	8880.01
90	90	330	10	30	30.0004	-0.0004	1.6e-07	0.000910116		0.0004	0.225508		60.0004	8880.01
90	90	30	10	30	30	0	0	0.000909956		0	0.225108		60	8820.01
90	90	180	10	-30	-29.9999	-0.0001	1e-08	0.000909956		0.0001	0.225108		-59.9999	8760.01
90	90	270	10	60	59.9995	0.0005	2.5e-07	0.000909946		0.0005	0.225008		119.999	8820.01
270	90	330	10	0	-0.00010207	0.00010207	1.04183e-08	0.000909696		0.00010207	0.224508		-0.00010207	8700.01
270	90	30	10	0	4.7766e-05	-4.7766e-05	2.28159e-09	0.000909685		4.7766e-05	0.224406		4.7766e-05	8700.01
270	90	180	10	0	-0.00028601	0.00028601	8.18017e-08	0.000909683		0.00028601	0.224359		-0.00028601	8700.01
270	90	270	10	0	-0.00020919	0.00020919	4.37605e-08	0.000909601		0.00020919	0.224073		-0.00020919	8700.01
330	90	330	10	0	0.00013733	-0.00013733	1.88595e-08	0.000909557		0.00013733	0.223863		0.00013733	8700.01
330	90	30	10	0	-0.00055387	0.00055387	3.06772e-07	0.000909538		0.00055387	0.223726		-0.00055387	8700.01
330	90	180	10	0	-0.00078466	0.00078466	6.15691e-07	0.000909232		0.00078466	0.223172		-0.00078466	8700.01
330	90	270	10	0	5.4202e-05	-5.4202e-05	2.93786e-09	0.000908616		5.4202e-05	0.222387		5.4202e-05	8700.01
30	90	330	10	0	-2.9713e-05	2.9713e-05	8.82862e-10	0.000908613		2.9713e-05	0.222333		-2.9713e-05	8700.01
30	90	30	10	0	2.0639e-06	-2.0639e-06	4.25968e-12	0.000908612		2.0639e-06	0.222304		2.0639e-06	8700.01
30	90	180	10	30	30.0001	-0.0001	1e-08	0.000908612		0.0001	0.222302		60.0001	8700.01
30	90	270	10	0	-2.1894e-05	2.1894e-05	4.79347e-10	0.000908602		2.1894e-05	0.222202		-2.1894e-05	8640.01
180	90	330	10	0	-2.3269e-05	2.3269e-05	5.41446e-10	0.000908602		2.3269e-05	0.22218		-2.3269e-05	8640.01
180	90	30	10	0	-3.0624e-05	3.0624e-05	9.37829e-10	0.000908601		3.0624e-05	0.222156		-3.0624e-05	8640.01
180	90	180	10	0	0.00034136	-0.00034136	1.16527e-07	0.0009086		0.00034136	0.222126		0.00034136	8640.01
180	90	270	10	0	6.7125e-05	-6.7125e-05	4.50577e-09	0.000908484		6.7125e-05	0.221784		6.7125e-05	8640.01
90	180	330	10	0	-7.9088e-05	7.9088e-05	6.25491e-09	0.000908479		7.9088e-05	0.221717		-7.9088e-05	8640.01
90	180	30	10	0	-2.4321e-06	2.4321e-06	5.91511e-12	0.000908473		2.4321e-06	0.221638		-2.4321e-06	8640.01
90	180	90	10	0	4.2522e-06	-4.2522e-06	1.80812e-11	0.000908473		4.2522e-06	0.221636		4.2522e-06	8640.01
90	180	270	10	0	-4.7587e-05	4.7587e-05	2.26452e-09	0.000908473		4.7587e-05	0.221631		-4.7587e-05	8640.01
270	180	330	10	0	-0.00015491	0.00015491	2.39971e-08	0.000908471		0.00015491	0.221584		-0.00015491	8640.01
270	180	30	10	0	-6.3939e-06	6.3939e-06	4.0882e-11	0.000908447		6.3939e-06	0.221429		-6.3939e-06	8640.01
270	180	90	10	0	-5.5922e-05	5.5922e-05	3.12727e-09	0.000908447		5.5922e-05	0.221423		-5.5922e-05	8640.01
270	180	270	10	0	-0.00010921	0.00010921	1.19268e-08	0.000908443		0.00010921	0.221367		-0.00010921	8640.01
330	180	330	10	0	0.00018002	-0.00018002	3.24072e-08	0.000908432		0.00018002	0.221257		0.00018002	8640.01
330	180	30	10	0	4.4643e-06	-4.4643e-06	1.993e-11	0.000908399		4.4643e-06	0.221077		4.4643e-06	8640.01
330	180	90	10	0	-1.347e-05	1.347e-05	1.81441e-10	0.000908399		1.347e-05	0.221073		-1.347e-05	8640.01
330	180	270	10	0	-5.2732e-05	5.2732e-05	2.78066e-09	0.000908399		5.2732e-05	0.221059		-5.2732e-05	8640.01
30	180	330	10	0	-3.4286e-05	3.4286e-05	1.17553e-09	0.000908396		3.4286e-05	0.221007		-3.4286e-05	8640.01
30	180	30	10	0	-4.5892e-07	4.5892e-07	2.10608e-13	0.000908395		4.5892e-07	0.220972		-4.5892e-07	8640.01
30	180	90	10	0	7.4285e-06	-7.4285e-06	5.51826e-11	0.000908395		7.4285e-06	0.220972		7.4285e-06	8640.01
30	180	270	10	0	-3.6532e-05	3.6532e-05	1.33459e-09	0.000908395		3.6532e-05	0.220965		-3.6532e-05	8640.01
180	180	330	10	-30	-30	0	0	0.000908394		0	0.220928		-60	8640.01
180	180	30	10	30	30	0	0	0.000908394		0	0.220928		60	8700.01
180	180	90	10	30	30.0003	-0.0003	9e-08	0.000908394		0.0003	0.220928		60.0003	8640.01
180	180	270	10	-30	-29.9998	-0.0002	4e-08	0.000908304		0.0002	0.220628		-59.9998	8580.01
90	270	330	10	0	-7.8645e-05	7.8645e-05	6.18504e-09	0.000908264		7.8645e-05	0.220428		-7.8645e-05	8640.01
90	270	30	10	0	-9.7712e-06	9.7712e-06	9.54763e-11	0.000908257		9.7712e-06	0.220349		-9.7712e-06	8640.01
90	270	90	10	0	-2.3985e-05	2.3985e-05	5.7528e-10	0.000908257		2.3985e-05	0.22034		-2.3985e-05	8640.01
90	270	180	10	0	-4.2968e-05	4.2968e-05	1.84625e-09	0.000908257		4.2968e-05	0.220316		-4.2968e-05	8640.01
270	270	330	10	-30	-29.9998	-0.0002	4e-08	0.000908255		0.0002	0.220273		-59.9998	8640.01
270	270	30	10	-30	-29.9995	-0.0005	2.5e-07	0.000908215		0.0005	0.220073		-59.9995	8700.01
270	270	90	10	60	60.0016	-0.0016	2.56e-06	0.000907965		0.0016	0.219573		120.002	8760.01
270	270	180	10	30	30.0017	-0.0017	2.89e-06	0.000905405		0.0017	0.217973		60.0017	8640.01
330	270	330	10	0	0.0002778	-0.0002778	7.71728e-08	0.000902515		0.0002778	0.216273		0.0002778	8580.01
330	270	30	10	0	0.00071572	-0.00071572	5.12255e-07	0.000902438		0.00071572	0.215995		0.00071572	8580.01
330	270	90	10	0	0.0001116	-0.0001116	1.24546e-08	0.000901925		0.0001116	0.215279		0.0001116	8580
330	270	180	10	-30	-29.9972	-0.0028	7.84e-06	0.000901913		0.0028	0.215168		-59.9972	8580
30	270	330	10	0	-5.0317e-05	5.0317e-05	2.5318e-09	0.000894073		5.0317e-05	0.212368		-5.0317e-05	8640
30	270	30	10	0	-3.3741e-05	3.3741e-05	1.13846e-09	0.00089407		3.3741e-05	0.212317		-3.3741e-05	8640
30	270	90	10	0	-2.5937e-05	2.5937e-05	6.72728e-10	0.000894069		2.5937e-05	0.212283		-2.5937e-05	8640
30	270	180	10	0	1.7024e-05	-1.7024e-05	2.89817e-10	0.000894069		1.7024e-05	0.212258		1.7024e-05	8640
180	270	330	10	0	-4.6534e-05	4.6534e-05	2.16541e-09	0.000894068		4.6534e-05	0.212241		-4.6534e-05	8640
180	270	30	10	0	0.00022458	-0.00022458	5.04362e-08	0.000894066		0.00022458	0.212194		0.00022458	8640
180	270	90	10	0	0.00013148	-0.00013148	1.7287e-08	0.000894016		0.00013148	0.211969		0.00013148	8640
180	270	180	10	0	0.0003117	-0.0003117	9.71569e-08	0.000893998		0.0003117	0.211838		0.0003117	8640
90	30	330	15	60	60.0005	-0.0005	2.5e-07	0.000893901		0.0005	0.211526		120.001	8640
270	330	30	15	60	60.0013	-0.0013	1.69e-06	0.000893651		0.0013	0.211026		120.001	8520
330	90	90	15	-60	-60.0013	0.0013	1.69e-06	0.000891961		0.0013	0.209726		-120.001	8400
30	180	180	15	0	4.9246e-05	-4.9246e-05	2.42517e-09	0.000890271		4.9246e-05	0.208426		4.9246e-05	8520
180	270	270	15	0	0.00028143	-0.00028143	7.92028e-08	0.000890269		0.00028143	0.208377		0.00028143	8520
90	330	30	15	0	-9.4196e-06	9.4196e-06	8.87289e-11	0.00089019		9.4196e-06	0.208096		-9.4196e-06	8520
90	90	90	15	0	3.5582e-05	-3.5582e-05	1.26608e-09	0.00089019		3.5582e-05	0.208086		3.5582e-05	8520
90	180	180	15	0	-0.00013021	0.00013021	1.69546e-08	0.000890188		0.00013021	0.208051		-0.00013021	8520
90	270	270	15	0	0.00036095	-0.00036095	1.30285e-07	0.000890171		0.00036095	0.20792		0.00036095	8520
270	30	330	15	0	0.00010514	-0.00010514	1.10544e-08	0.000890041		0.00010514	0.207559		0.00010514	8520
270	90	90	15	0	1.0539e-05	-1.0539e-05	1.11071e-10	0.00089003		1.0539e-05	0.207454		1.0539e-05	8520
270	180	180	15	0	0.00010172	-0.00010172	1.0347e-08	0.00089003		0.00010172	0.207444		0.00010172	8520
270	270	270	15	0	-0.00040911	0.00040911	1.67371e-07	0.00089002		0.00040911	0.207342		-0.00040911	8520
330	30	330	15	0	0.00060267	-0.00060267	3.63211e-07	0.000889852		0.00060267	0.206933		0.00060267	8520
330	330	30	15	0	1.9005e-05	-1.9005e-05	3.6119e-10	0.000889489		1.9005e-05	0.20633		1.9005e-05	8520
330	180	180	15	0	-9.168e-05	9.168e-05	8.40522e-09	0.000889489		9.168e-05	0.206311		-9.168e-05	8520
330	270	270	15	0	-0.00069772	0.00069772	4.86813e-07	0.00088948		0.00069772	0.20622		-0.00069772	8520
30	30	330	15	0	0.00037523	-0.00037523	1.40798e-07	0.000888993		0.00037523	0.205522		0.00037523	8520
30	330	30	15	0	-6.5846e-05	6.5846e-05	4.3357e-09	0.000888853		6.5846e-05	0.205147		-6.5846e-05	8520
30	90	90	15	0	3.7351e-05	-3.7351e-05	1.3951e-09	0.000888848		3.7351e-05	0.205081		3.7351e-05	8520
30	270	270	15	0	0.00044991	-0.00044991	2.02419e-07	0.000888847		0.00044991	0.205043		0.00044991	8520
180	30	330	15	0	5.7192e-05	-5.7192e-05	3.27092e-09	0.000888644		5.7192e-05	0.204593		5.7192e-05	8520
180	330	30	15	0	0.00023064	-0.00023064	5.31948e-08	0.000888641		0.00023064	0.204536		0.00023064	8520
180	90	90	15	0	-9.8376e-05	9.8376e-05	9.67784e-09	0.000888588		9.8376e-05	0.204306		-9.8376e-05	8520
180	180	180	15	0	-0.00031211	0.00031211	9.74127e-08	0.000888578		0.00031211	0.204207		-0.00031211	8520
90	330	330	15	0	0.00013442	-0.00013442	1.80687e-08	0.000888481		0.00013442	0.203895		0.00013442	8520
90	330	90	15	0	-1.7413e-05	1.7413e-05	3.03213e-10	0.000888463		1.7413e-05	0.203761		-1.7413e-05	8520
90	330	180	15	0	-6.2626e-05	6.2626e-05	3.92202e-09	0.000888463		6.2626e-05	0.203743		-6.2626e-05	8520
90	330	270	15	0	0.00045092	-0.00045092	2.03329e-07	0.000888459		0.00045092	0.203681		0.00045092	8520
270	330	330	15	0	0.0077	-0.0077	5.929e-05	0.000888255		0.0077	0.20323		0.0077	8520
270	330	90	15	0	0.0014	-0.0014	1.96e-06	0.000828965		0.0014	0.19553		0.0014	8519.99
270	330	180	15	0	-0.00069539	0.00069539	4.83567e-07	0.000827005		0.00069539	0.19413		-0.00069539	8519.99
270	330	270	15	0	0.0023	-0.0023	5.29e-06	0.000826522		0.0023	0.193434		0.0023	8519.99
330	330	330	15	0	0.0021	-0.0021	4.41e-06	0.000821232		0.0021	0.191134		0.0021	8519.99
330	330	90	15	0	-1.3651e-05	1.3651e-05	1.8635e-10	0.000816822		1.3651e-05	0.189034		-1.3651e-05	8519.99
330	330	180	15	0	0.0013	-0.0013	1.69e-06	0.000816822		0.0013	0.189021		0.0013	8519.99
330	330	270	15	30	29.9995	0.0005	2.5e-07	0.000815132		0.0005	0.187721		59.9995	8519.99
30	330	330	15	0	0.00028208	-0.00028208	7.95691e-08	0.000814882		0.00028208	0.187221		0.00028208	8459.99
30	330	90	15	0	-4.8794e-05	4.8794e-05	2.38085e-09	0.000814802		4.8794e-05	0.186939		-4.8794e-05	8459.99
30	330	180	15	0	-7.8331e-05	7.8331e-05	6.13575e-09	0.0008148		7.8331e-05	0.18689		-7.8331e-05	8459.99
30	330	270	15	0	0.00028558	-0.00028558	8.15559e-08	0.000814793		0.00028558	0.186812		0.00028558	8459.99
180	330	330	15	60	59.9992	0.0008	6.4e-07	0.000814712		0.0008	0.186526		119.999	8459.99
180	330	90	15	0	0.000194	-0.000194	3.7636e-08	0.000814072		0.000194	0.185726		0.000194	8339.99
180	330	180	15	0	0.0001254	-0.0001254	1.57252e-08	0.000814034		0.0001254	0.185532		0.0001254	8339.99
180	330	270	15	0	8.8827e-05	-8.8827e-05	7.89024e-09	0.000814019		8.8827e-05	0.185407		8.8827e-05	8339.99
90	30	30	15	0	8.1585e-06	-8.1585e-06	6.65611e-11	0.000814011		8.1585e-06	0.185318		8.1585e-06	8339.99
90	30	90	15	0	2.7241e-05	-2.7241e-05	7.42072e-10	0.000814011		2.7241e-05	0.18531		2.7241e-05	8339.99
90	30	180	15	0	0.00015683	-0.00015683	2.45956e-08	0.00081401		0.00015683	0.185282		0.00015683	8339.99
90	30	270	15	0	0.00049986	-0.00049986	2.4986e-07	0.000813985		0.00049986	0.185126		0.00049986	8339.99
270	30	30	15	0	4.8539e-05	-4.8539e-05	2.35603e-09	0.000813735		4.8539e-05	0.184626		4.8539e-05	8339.99
270	30	90	15	0	0.00020713	-0.00020713	4.29028e-08	0.000813733		0.00020713	0.184577		0.00020713	8339.99
270	30	180	15	0	4.3433e-05	-4.3433e-05	1.88643e-09	0.00081369		4.3433e-05	0.18437		4.3433e-05	8339.98
270	30	270	15	0	0.00016497	-0.00016497	2.72151e-08	0.000813688		0.00016497	0.184327		0.00016497	8339.98
330	30	30	15	0	0.00015278	-0.00015278	2.33417e-08	0.000813661		0.00015278	0.184162		0.00015278	8339.98
330	30	90	15	0	-7.0182e-05	7.0182e-05	4.92551e-09	0.000813638		7.0182e-05	0.184009		-7.0182e-05	8339.98
330	30	180	15	360	360	0.0005	2.5e-07	0.000813633		0.0005	0.183939		720	8339.98
330	30	270	15	0	0.00035507	-0.00035507	1.26075e-07	0.000813383		0.00035507	0.183439		0.00035507	7619.99
30	30	30	15	0	-8.2932e-06	8.2932e-06	6.87772e-11	0.000813257		8.2932e-06	0.183084		-8.2932e-06	7619.98
30	30	90	15	0	8.507e-05	-8.507e-05	7.2369e-09	0.000813257		8.507e-05	0.183075		8.507e-05	7619.98
30	30	180	15	0	-1.9593e-05	1.9593e-05	3.83886e-10	0.000813249		1.9593e-05	0.18299		-1.9593e-05	7619.98
30	30	270	15	-30	-29.9995	-0.0005	2.5e-07	0.000813249		0.0005	0.182971		-59.9995	7619.98
180	30	30	15	0	-5.9625e-05	5.9625e-05	3.55514e-09	0.000812999		5.9625e-05	0.182471		-5.9625e-05	7679.98
180	30	90	15	0	-4.1191e-05	4.1191e-05	1.6967e-09	0.000812995		4.1191e-05	0.182411		-4.1191e-05	7679.98
180	30	180	15	0	0.00043634	-0.00043634	1.90393e-07	0.000812994		0.00043634	0.18237		0.00043634	7679.98
180	30	270	15	0	0.00012665	-0.00012665	1.60402e-08	0.000812803		0.00012665	0.181933		0.00012665	7679.98
90	90	330	15	0	3.5573e-05	-3.5573e-05	1.26544e-09	0.000812787		3.5573e-05	0.181807		3.5573e-05	7679.98
90	90	30	15	0	-5.5135e-05	5.5135e-05	3.03987e-09	0.000812786		5.5135e-05	0.181771		-5.5135e-05	7679.98
90	90	180	15	0	-3.3148e-05	3.3148e-05	1.09879e-09	0.000812783		3.3148e-05	0.181716		-3.3148e-05	7679.98
90	90	270	15	0	-4.233e-05	4.233e-05	1.79183e-09	0.000812782		4.233e-05	0.181683		-4.233e-05	7679.98
270	90	330	15	60	59.9998	0.0002	4e-08	0.00081278		0.0002	0.181641		120	7679.98
270	90	30	15	0	-7.6907e-05	7.6907e-05	5.91469e-09	0.00081274		7.6907e-05	0.181441		-7.6907e-05	7559.98
270	90	180	15	0	0.00031106	-0.00031106	9.67583e-08	0.000812734		0.00031106	0.181364		0.00031106	7559.98
270	90	270	15	0	6.1341e-05	-6.1341e-05	3.76272e-09	0.000812637		6.1341e-05	0.181053		6.1341e-05	7559.98
330	90	330	15	0	0.00027139	-0.00027139	7.36525e-08	0.000812634		0.00027139	0.180991		0.00027139	7559.98
330	90	30	15	0	-2.6615e-05	2.6615e-05	7.08358e-10	0.00081256		2.6615e-05	0.18072		-2.6615e-05	7559.98
330	90	180	15	0	-0.0016	0.0016	2.56e-06	0.000812559		0.0016	0.180693		-0.0016	7559.98
330	90	270	15	0	-5.7859e-05	5.7859e-05	3.34766e-09	0.000809999		5.7859e-05	0.179093		-5.7859e-05	7559.98
30	90	330	15	0	-6.4649e-05	6.4649e-05	4.17949e-09	0.000809996		6.4649e-05	0.179035		-6.4649e-05	7559.99
30	90	30	15	0	2.4473e-05	-2.4473e-05	5.98928e-10	0.000809992		2.4473e-05	0.178971		2.4473e-05	7559.99
30	90	180	15	0	4.4409e-05	-4.4409e-05	1.97216e-09	0.000809991		4.4409e-05	0.178946		4.4409e-05	7559.99
30	90	270	15	360	360	0.0001	1e-08	0.000809989		0.0001	0.178902		720	7559.99
180	90	330	15	0	2.9103e-05	-2.9103e-05	8.46985e-10	0.000809979		2.9103e-05	0.178802		2.9103e-05	6839.99
180	90	30	15	0	-0.00014513	0.00014513	2.10627e-08	0.000809978		0.00014513	0.178773		-0.00014513	6839.99
180	90	180	15	-30	-29.9989	-0.0011	1.21e-06	0.000809957		0.0011	0.178628		-59.9989	6839.99
180	90	270	15	0	-7.9932e-05	7.9932e-05	6.38912e-09	0.000808747		7.9932e-05	0.177528		-7.9932e-05	6899.98
90	180	330	15	0	-0.00011377	0.00011377	1.29436e-08	0.000808741		0.00011377	0.177448		-0.00011377	6899.98
90	180	30	15	0	4.1565e-05	-4.1565e-05	1.72765e-09	0.000808728		4.1565e-05	0.177334		4.1565e-05	6899.98
90	180	90	15	0	1.0612e-05	-1.0612e-05	1.12615e-10	0.000808726		1.0612e-05	0.177292		1.0612e-05	6899.98
90	180	270	15	0	-0.00021755	0.00021755	4.7328e-08	0.000808726		0.00021755	0.177282		-0.00021755	6899.98
270	180	330	15	0	-0.00077619	0.00077619	6.02471e-07	0.000808679		0.00077619	0.177064		-0.00077619	6899.98
270	180	30	15	0	-3.483e-05	3.483e-05	1.21313e-09	0.000808076		3.483e-05	0.176288		-3.483e-05	6899.99
270	180	90	15	0	-8.8969e-05	8.8969e-05	7.91548e-09	0.000808075		8.8969e-05	0.176253		-8.8969e-05	6899.99
270	180	270	15	0	-0.00027983	0.00027983	7.83048e-08	0.000808067		0.00027983	0.176164		-0.00027983	6899.99
330	180	330	15	0	-0.00043461	0.00043461	1.88886e-07	0.000807989		0.00043461	0.175884		-0.00043461	6899.99
330	180	30	15	0	2.6372e-05	-2.6372e-05	6.95482e-10	0.0008078		2.6372e-05	0.17545		2.6372e-05	6899.99
330	180	90	15	0	2.6072e-06	-2.6072e-06	6.79749e-12	0.000807799		2.6072e-06	0.175423		2.6072e-06	6899.99
330	180	270	15	0	-0.00050513	0.00050513	2.55156e-07	0.000807799		0.00050513	0.175421		-0.00050513	6899.99
30	180	330	15	0	-0.0001454	0.0001454	2.11412e-08	0.000807544		0.0001454	0.174916		-0.0001454	6899.99
30	180	30	15	0	-3.167e-06	3.167e-06	1.00299e-11	0.000807523		3.167e-06	0.17477		-3.167e-06	6899.99
30	180	90	15	0	2.2678e-05	-2.2678e-05	5.14292e-10	0.000807523		2.2678e-05	0.174767		2.2678e-05	6899.99
30	180	270	15	0	-5.2495e-05	5.2495e-05	2.75573e-09	0.000807523		5.2495e-05	0.174744		-5.2495e-05	6899.99
180	180	330	15	0	-0.00019417	0.00019417	3.7702e-08	0.00080752		0.00019417	0.174692		-0.00019417	6899.99
180	180	30	15	-30	-30.0003	0.0003	9e-08	0.000807482		0.0003	0.174498		-60.0003	6899.99
180	180	90	15	30	29.9989	0.0011	1.21e-06	0.000807392		0.0011	0.174198		59.9989	6959.99
180	180	270	15	0	3.5145e-05	-3.5145e-05	1.23517e-09	0.000806182		3.5145e-05	0.173098		3.5145e-05	6899.99
90	270	330	15	0	-0.00011078	0.00011078	1.22722e-08	0.000806181		0.00011078	0.173063		-0.00011078	6899.99
90	270	30	15	0	-1.8328e-05	1.8328e-05	3.35916e-10	0.000806169		1.8328e-05	0.172952		-1.8328e-05	6899.99
90	270	90	15	0	-1.6777e-05	1.6777e-05	2.81468e-10	0.000806168		1.6777e-05	0.172934		-1.6777e-05	6899.99
90	270	180	15	0	2.8994e-05	-2.8994e-05	8.40652e-10	0.000806168		2.8994e-05	0.172917		2.8994e-05	6899.99
270	270	330	15	0	-0.00091401	0.00091401	8.35414e-07	0.000806167		0.00091401	0.172888		-0.00091401	6899.99
270	270	30	15	0	-0.00028498	0.00028498	8.12136e-08	0.000805332		0.00028498	0.171974		-0.00028498	6899.99
270	270	90	15	0	-0.00016921	0.00016921	2.8632e-08	0.00080525		0.00016921	0.171689		-0.00016921	6899.99
270	270	180	15	60	59.994	0.006	3.6e-05	0.000805222		0.006	0.17152		119.994	6899.99
330	270	330	15	0	-0.0016	0.0016	2.56e-06	0.000769222		0.0016	0.16552		-0.0016	6780
330	270	30	15	0	9.8759e-06	-9.8759e-06	9.75334e-11	0.000766662		9.8759e-06	0.16392		9.8759e-06	6780
330	270	90	15	0	7.4907e-06	-7.4907e-06	5.61106e-11	0.000766662		7.4907e-06	0.16391		7.4907e-06	6780
330	270	180	15	0	-0.0031	0.0031	9.61e-06	0.000766662		0.0031	0.163902		-0.0031	6780
30	270	330	15	360	360	-0.0002	4e-08	0.000757052		0.0002	0.160802		720	6780
30	270	30	15	0	-0.00026053	0.00026053	6.78759e-08	0.000757012		0.00026053	0.160602		-0.00026053	6060
30	270	90	15	0	-1.745e-05	1.745e-05	3.04503e-10	0.000756944		1.745e-05	0.160342		-1.745e-05	6060
30	270	180	15	0	-4.0123e-06	4.0123e-06	1.60986e-11	0.000756943		4.0123e-06	0.160324		-4.0123e-06	6060
180	270	330	15	0	0.00020191	-0.00020191	4.07676e-08	0.000756943		0.00020191	0.16032		0.00020191	6060
180	270	30	15	30	30.0004	-0.0004	1.6e-07	0.000756903		0.0004	0.160118		60.0004	6060
180	270	90	15	0	1.4249e-06	-1.4249e-06	2.03034e-12	0.000756743		1.4249e-06	0.159718		1.4249e-06	6000
180	270	180	15	0	0.00016679	-0.00016679	2.78189e-08	0.000756743		0.00016679	0.159717		0.00016679	6000
90	30	330	25	360	359.986	0.0139	0.00019321	0.000756715		0.0139	0.15955		719.986	6000
270	330	30	25	360	359.994	0.0063	3.969e-05	0.000563505		0.0063	0.14565		719.994	5280.01
330	90	90	25	0	-0.0013	0.0013	1.69e-06	0.000523815		0.0013	0.13935		-0.0013	4560.02
30	180	180	25	0	-0.00014038	0.00014038	1.97065e-08	0.000522125		0.00014038	0.13805		-0.00014038	4560.02
180	270	270	25	0	-0.00037535	0.00037535	1.40888e-07	0.000522105		0.00037535	0.13791		-0.00037535	4560.02
90	330	30	25	0	0.00065907	-0.00065907	4.34373e-07	0.000521964		0.00065907	0.137534		0.00065907	4560.02
90	90	90	25	0	7.6446e-05	-7.6446e-05	5.84399e-09	0.00052153		7.6446e-05	0.136875		7.6446e-05	4560.02
90	180	180	25	0	0.00023499	-0.00023499	5.52203e-08	0.000521524		0.00023499	0.136799		0.00023499	4560.02
90	270	270	25	0	-0.00034257	0.00034257	1.17354e-07	0.000521469		0.00034257	0.136564		-0.00034257	4560.02
270	30	330	25	0	0.0025	-0.0025	6.25e-06	0.000521351		0.0025	0.136221		0.0025	4560.02
270	90	90	25	0	-9.6642e-05	9.6642e-05	9.33968e-09	0.000515101		9.6642e-05	0.133721		-9.6642e-05	4560.02
270	180	180	25	0	-0.0002775	0.0002775	7.70063e-08	0.000515092		0.0002775	0.133625		-0.0002775	4560.02
270	270	270	25	0	0.00080396	-0.00080396	6.46352e-07	0.000515015		0.00080396	0.133347		0.00080396	4560.02
330	30	330	25	0	0.00031175	-0.00031175	9.71881e-08	0.000514369		0.00031175	0.132543		0.00031175	4560.02
330	330	30	25	0	0.0017	-0.0017	2.89e-06	0.000514272		0.0017	0.132231		0.0017	4560.02
330	180	180	25	0	-0.00017959	0.00017959	3.22526e-08	0.000511382		0.00017959	0.130531		-0.00017959	4560.02
330	270	270	25	0	0.00035264	-0.00035264	1.24355e-07	0.000511349		0.00035264	0.130352		0.00035264	4560.02
30	30	330	25	0	0.0014	-0.0014	1.96e-06	0.000511225		0.0014	0.129999		0.0014	4560.02
30	330	30	25	0	0.00042446	-0.00042446	1.80166e-07	0.000509265		0.00042446	0.128599		0.00042446	4560.01
30	90	90	25	0	-8.0227e-06	8.0227e-06	6.43637e-11	0.000509085		8.0227e-06	0.128175		-8.0227e-06	4560.01
30	270	270	25	0	-0.0014	0.0014	1.96e-06	0.000509085		0.0014	0.128167		-0.0014	4560.01
180	30	330	25	0	-0.00010309	0.00010309	1.06275e-08	0.000507125		0.00010309	0.126767		-0.00010309	4560.02
180	330	30	25	0	-0.0021	0.0021	4.41e-06	0.000507114		0.0021	0.126664		-0.0021	4560.02
180	90	90	25	0	-0.00017415	0.00017415	3.03282e-08	0.000502704		0.00017415	0.124564		-0.00017415	4560.02
180	180	180	25	0	3.5508e-05	-3.5508e-05	1.26082e-09	0.000502674		3.5508e-05	0.124389		3.5508e-05	4560.02
90	330	330	25	0	-0.00068087	0.00068087	4.63584e-07	0.000502673		0.00068087	0.124354		-0.00068087	4560.02
90	330	90	25	0	0.00074182	-0.00074182	5.50297e-07	0.000502209		0.00074182	0.123673		0.00074182	4560.02
90	330	180	25	0	0.00052209	-0.00052209	2.72578e-07	0.000501659		0.00052209	0.122931		0.00052209	4560.02
90	330	270	25	30	30.0009	-0.0009	8.1e-07	0.000501386		0.0009	0.122409		60.0009	4560.02
270	330	330	25	0	0.00054791	-0.00054791	3.00205e-07	0.000500576		0.00054791	0.121509		0.00054791	4500.02
270	330	90	25	30	30.0046	-0.0046	2.116e-05	0.000500276		0.0046	0.120961		60.0046	4500.02
270	330	180	25	0	0.0013	-0.0013	1.69e-06	0.000479116		0.0013	0.116361		0.0013	4440.01
270	330	270	25	0	-0.0008702	0.0008702	7.57248e-07	0.000477426		0.0008702	0.115061		-0.0008702	4440.01
330	330	330	25	0	-0.0027	0.0027	7.29e-06	0.000476669		0.0027	0.114191		-0.0027	4440.01
330	330	90	25	0	0.0081	-0.0081	6.561e-05	0.000469379		0.0081	0.111491		0.0081	4440.01
330	330	180	25	30	30.0022	-0.0022	4.84e-06	0.000403769		0.0022	0.103391		60.0022	4440.01
330	330	270	25	0	-0.0016	0.0016	2.56e-06	0.000398929		0.0016	0.101191		-0.0016	4380
30	330	330	25	0	-9.1207e-05	9.1207e-05	8.31872e-09	0.000396369		9.1207e-05	0.0995911		-9.1207e-05	4380
30	330	90	25	0	0.00015494	-0.00015494	2.40064e-08	0.00039636		0.00015494	0.0994999		0.00015494	4380.01
30	330	180	25	0	0.0018	-0.0018	3.24e-06	0.000396336		0.0018	0.0993449		0.0018	4380
30	330	270	25	360	359.998	0.0019	3.61e-06	0.000393096		0.0019	0.0975449		719.998	4380
180	330	330	25	0	0.0016	-0.0016	2.56e-06	0.000389486		0.0016	0.0956449		0.0016	3660.01
180	330	90	25	0	-0.00011055	0.00011055	1.22213e-08	0.000386926		0.00011055	0.0940449		-0.00011055	3660
180	330	180	25	0	0.00062762	-0.00062762	3.93907e-07	0.000386914		0.00062762	0.0939344		0.00062762	3660
180	330	270	25	0	0.0035	-0.0035	1.225e-05	0.00038652		0.0035	0.0933067		0.0035	3660
90	30	30	25	0	-1.714e-05	1.714e-05	2.9378e-10	0.00037427		1.714e-05	0.0898067		-1.714e-05	3660
90	30	90	25	0	3.5188e-05	-3.5188e-05	1.2382e-09	0.00037427		3.5188e-05	0.0897896		3.5188e-05	3660
90	30	180	25	0	-1.0655e-06	1.0655e-06	1.13529e-12	0.000374269		1.0655e-06	0.0897544		-1.0655e-06	3660
90	30	270	25	-30	-29.998	-0.002	4e-06	0.000374269		0.002	0.0897534		-59.998	3660
270	30	30	25	0	0.00030643	-0.00030643	9.38993e-08	0.000370269		0.00030643	0.0877534		0.00030643	3720
270	30	90	25	-30	-29.9993	-0.0007	4.9e-07	0.000370175		0.0007	0.0874469		-59.9993	3720
270	30	180	25	0	-0.00073889	0.00073889	5.45958e-07	0.000369685		0.00073889	0.0867469		-0.00073889	3780
270	30	270	25	0	-2.7302e-05	2.7302e-05	7.45399e-10	0.000369139		2.7302e-05	0.086008		-2.7302e-05	3780
330	30	30	25	0	-9.0631e-05	9.0631e-05	8.21398e-09	0.000369138		9.0631e-05	0.0859807		-9.0631e-05	3780
330	30	90	25	360	360	-0.0001	1e-08	0.00036913		0.0001	0.0858901		720	3780
330	30	180	25	0	-0.0017	0.0017	2.89e-06	0.00036912		0.0017	0.0857901		-0.0017	3060
330	30	270	25	0	2.1365e-05	-2.1365e-05	4.56463e-10	0.00036623		2.1365e-05	0.0840901		2.1365e-05	3060
30	30	30	25	0	7.4414e-06	-7.4414e-06	5.53744e-11	0.000366229		7.4414e-06	0.0840687		7.4414e-06	3060
30	30	90	25	0	5.34e-06	-5.34e-06	2.85156e-11	0.000366229		5.34e-06	0.0840613		5.34e-06	3060
30	30	180	25	-30	-30.0007	0.0007	4.9e-07	0.000366229		0.0007	0.084056		-60.0007	3060
30	30	270	25	0	-0.00058586	0.00058586	3.43232e-07	0.000365739		0.00058586	0.083356		-0.00058586	3120
180	30	30	25	0	-0.00031088	0.00031088	9.66464e-08	0.000365396		0.00031088	0.0827701		-0.00031088	3120
180	30	90	25	0	-0.00015852	0.00015852	2.51286e-08	0.000365299		0.00015852	0.0824592		-0.00015852	3120
180	30	180	25	0	-0.00019946	0.00019946	3.97843e-08	0.000365274		0.00019946	0.0823007		-0.00019946	3120
180	30	270	25	0	0.00054309	-0.00054309	2.94947e-07	0.000365235		0.00054309	0.0821012		0.00054309	3120
90	90	330	25	0	0.0001079	-0.0001079	1.16424e-08	0.00036494		0.0001079	0.0815581		0.0001079	3120
90	90	30	25	0	2.6815e-05	-2.6815e-05	7.19044e-10	0.000364928		2.6815e-05	0.0814502		2.6815e-05	3120
90	90	180	25	0	0.00034484	-0.00034484	1.18915e-07	0.000364927		0.00034484	0.0814234		0.00034484	3120
90	90	270	25	60	59.9967	0.0033	1.089e-05	0.000364808		0.0033	0.0810786		119.997	3120
270	90	330	25	0	-0.00012965	0.00012965	1.68091e-08	0.000353918		0.00012965	0.0777786		-0.00012965	3000
270	90	30	25	0	-0.00012567	0.00012567	1.57929e-08	0.000353901		0.00012567	0.0776489		-0.00012567	3000
270	90	180	25	0	-0.0015	0.0015	2.25e-06	0.000353886		0.0015	0.0775233		-0.0015	3000
270	90	270	25	0	-0.00042744	0.00042744	1.82705e-07	0.000351636		0.00042744	0.0760233		-0.00042744	3000
330	90	330	25	0	4.8659e-05	-4.8659e-05	2.3677e-09	0.000351453		4.8659e-05	0.0755958		4.8659e-05	3000.01
330	90	30	25	0	0.00038233	-0.00038233	1.46176e-07	0.000351451		0.00038233	0.0755472		0.00038233	3000.01
330	90	180	25	0	-0.0074	0.0074	5.476e-05	0.000351304		0.0074	0.0751648		-0.0074	3000
330	90	270	25	0	-0.00019234	0.00019234	3.69947e-08	0.000296544		0.00019234	0.0677648		-0.00019234	3000.01
30	90	330	25	0	-0.00048961	0.00048961	2.39718e-07	0.000296507		0.00048961	0.0675725		-0.00048961	3000.01
30	90	30	25	0	2.5017e-05	-2.5017e-05	6.2585e-10	0.000296268		2.5017e-05	0.0670829		2.5017e-05	3000.01
30	90	180	25	360	359.999	0.0009	8.1e-07	0.000296267		0.0009	0.0670579		719.999	3000.01
30	90	270	25	0	-0.0001654	0.0001654	2.73572e-08	0.000295457		0.0001654	0.0661579		-0.0001654	2280.01
180	90	330	25	0	0.0016	-0.0016	2.56e-06	0.00029543		0.0016	0.0659925		0.0016	2280.01
180	90	30	25	360	360	-0.0003	9e-08	0.00029287		0.0003	0.0643925		720	2280.01
180	90	180	25	0	0.00014518	-0.00014518	2.10772e-08	0.00029278		0.00014518	0.0640925		0.00014518	1560.01
180	90	270	25	0	0.00014113	-0.00014113	1.99177e-08	0.000292759		0.00014113	0.0639473		0.00014113	1560.01
90	180	330	25	0	-0.0027	0.0027	7.29e-06	0.000292739		0.0027	0.0638062		-0.0027	1560.01
90	180	30	25	0	-1.0804e-05	1.0804e-05	1.16726e-10	0.000285449		1.0804e-05	0.0611062		-1.0804e-05	1560.01
90	180	90	25	0	7.1696e-05	-7.1696e-05	5.14032e-09	0.000285449		7.1696e-05	0.0610954		7.1696e-05	1560.01
90	180	270	25	0	-0.0012	0.0012	1.44e-06	0.000285443		0.0012	0.0610237		-0.0012	1560.01
270	180	330	25	0	-0.00092117	0.00092117	8.48554e-07	0.000284003		0.00092117	0.0598237		-0.00092117	1560.02
270	180	30	25	0	-0.0013	0.0013	1.69e-06	0.000283155		0.0013	0.0589025		-0.0013	1560.02
270	180	90	25	0	0.0002443	-0.0002443	5.96825e-08	0.000281465		0.0002443	0.0576025		0.0002443	1560.02
270	180	270	25	0	0.00011798	-0.00011798	1.39193e-08	0.000281405		0.00011798	0.0573582		0.00011798	1560.02
330	180	330	25	0	-0.00016543	0.00016543	2.73671e-08	0.000281391		0.00016543	0.0572402		-0.00016543	1560.02
330	180	30	25	0	0.0002017	-0.0002017	4.06829e-08	0.000281364		0.0002017	0.0570748		0.0002017	1560.02
330	180	90	25	0	-0.00015184	0.00015184	2.30554e-08	0.000281323		0.00015184	0.0568731		-0.00015184	1560.02
330	180	270	25	0	-0.00086484	0.00086484	7.47948e-07	0.0002813		0.00086484	0.0567212		-0.00086484	1560.02
30	180	330	25	0	0.00024932	-0.00024932	6.21605e-08	0.000280552		0.00024932	0.0558564		0.00024932	1560.02
30	180	30	25	0	6.282e-05	-6.282e-05	3.94635e-09	0.00028049		6.282e-05	0.0556071		6.282e-05	1560.02
30	180	90	25	0	4.1932e-05	-4.1932e-05	1.75829e-09	0.000280486		4.1932e-05	0.0555443		4.1932e-05	1560.02
30	180	270	25	0	0.00016895	-0.00016895	2.85441e-08	0.000280484		0.00016895	0.0555023		0.00016895	1560.02
180	180	330	25	-30	-29.9993	-0.0007	4.9e-07	0.000280456		0.0007	0.0553334		-59.9993	1560.02
180	180	30	25	30	29.9997	0.0003	9e-08	0.000279966		0.0003	0.0546334		59.9997	1620.02
180	180	90	25	0	-0.00022646	0.00022646	5.12841e-08	0.000279876		0.00022646	0.0543334		-0.00022646	1560.02
180	180	270	25	0	2.1343e-05	-2.1343e-05	4.55524e-10	0.000279825		2.1343e-05	0.0541069		2.1343e-05	1560.02
90	270	330	25	0	-0.002	0.002	4e-06	0.000279824		0.002	0.0540856		-0.002	1560.02
90	270	30	25	0	0.001	-0.001	1e-06	0.000275824		0.001	0.0520856		0.001	1560.02
90	270	90	25	0	0.0016	-0.0016	2.56e-06	0.000274824		0.0016	0.0510856		0.0016	1560.02
90	270	180	25	0	0.00091188	-0.00091188	8.31525e-07	0.000272264		0.00091188	0.0494856		0.00091188	1560.02
270	270	330	25	0	-0.00059386	0.00059386	3.5267e-07	0.000271433		0.00059386	0.0485737		-0.00059386	1560.02
270	270	30	25	0	0.0031	-0.0031	9.61e-06	0.00027108		0.0031	0.0479798		0.0031	1560.02
270	270	90	25	60	60.0078	-0.0078	6.084e-05	0.00026147		0.0078	0.0448798		120.008	1560.01
270	270	180	25	0	0.0012	-0.0012	1.44e-06	0.00020063		0.0012	0.0370798		0.0012	1440.01
330	270	330	25	0	-0.0011	0.0011	1.21e-06	0.00019919		0.0011	0.0358798		-0.0011	1440
330	270	30	25	0	0.0069	-0.0069	4.761e-05	0.00019798		0.0069	0.0347798		0.0069	1440.01
330	270	90	25	0	0.0068	-0.0068	4.624e-05	0.00015037		0.0068	0.0278798		0.0068	1440
330	270	180	25	360	359.996	0.0036	1.296e-05	0.00010413		0.0036	0.0210798		719.996	1439.99
30	270	330	25	0	-0.0013	0.0013	1.69e-06	9.11699e-05		0.0013	0.0174798		-0.0013	719.996
30	270	30	25	0	0.00082458	-0.00082458	6.79932e-07	8.94799e-05		0.00082458	0.0161798		0.00082458	719.997
30	270	90	25	0	0.00084254	-0.00084254	7.09874e-07	8.88e-05		0.00084254	0.0153553		0.00084254	719.996
30	270	180	25	0	-0.0078	0.0078	6.084e-05	8.80901e-05		0.0078	0.0145127		-0.0078	719.995
180	270	330	25	360	359.998	0.0018	3.24e-06	2.72501e-05		0.0018	0.00671272		719.998	720.003
180	270	30	25	0	-1.1185e-05	1.1185e-05	1.25104e-10	2.40101e-05		1.1185e-05	0.00491272		-1.1185e-05	0.00488728
180	270	90	25	0	-1.5326e-06	1.5326e-06	2.34886e-12	2.401e-05		1.5326e-06	0.00490153		-1.5326e-06	0.00489847
180	270	180	25	0	0.0049	-0.0049	2.401e-05	2.401e-05		0.0049	0.0049		0.0049	0.0049
